# Supplementary material for: Identification of miRNAs Involved in Intracranial Aneurysm Rupture in Cigarette-Smoking Patients
Source: PubMed Central journal article supplement — Neurol Ther. 2023 Oct 4;12(6):2101–19. doi: 10.1007/s40120-023-00547-9 (PMC10630182; doi:10.1007/s40120-023-00547-9), 2023-10-04
Supplement: 40120_2023_547_MOESM1_ESM.pdf [file 40120_2023_547_MOESM1_ESM.pdf]

## Supplementary Material

### Identification of miRNAs involved in intracranial aneurysm rupture in cigarette smoking patients

Hanbin Wang <sup>1,#</sup>, Luxuan Wang <sup>2,#</sup>, Yanli Tan <sup>3</sup>, Chuan Fang <sup>1,4\*</sup>, Chunhui Li <sup>1,\*</sup>, Lijian Zhang <sup>1,4\*</sup>

1. Department of Neurosurgery, Affiliated Hospital of Hebei University, Hebei University, Baoding, Hebei province, 071000, China;

2. Department of Neurological Function Examination, Affiliated Hospital of Hebei University, Hebei University, Baoding, Hebei province, 071000, China;

3. Department of Pathology, Affiliated Hospital of Hebei University, Hebei University, Baoding, Hebei province, 071000, China;

4. Postdoctoral Research Station of Neurosurgery, Affiliated Hospital of Hebei University, Hebei University, Baoding, Hebei province, 071000, China;

**# Both authors contribute equally to this work**

#### **\*Correspondence:**

Lijian Zhang, Department of Neurosurgery, Affiliated Hospital of Hebei University, Hebei University, Baoding, China. E-mail: lijian.zhang@aliyun.com. orcid: 0000-0003-3881-7705.

Chunhui Li, Department of Neurosurgery, Affiliated Hospital of Hebei University, Hebei University, Baoding, China. E-mail:

[lichunhui0860312@sina.com](mailto:lichunhui0860312@sina.com)

Chuan Fang, Department of Neurosurgery, Affiliated Hospital of Hebei University, Hebei University, Baoding, China. E-mail:  
[chuanfang@hbu.edu.cn](mailto:chuanfang@hbu.edu.cn)

**Supplementary Table 1 Differentially expressed miRNAs between smoking IA patients and healthy controls.**

| miR name                    | miR sequence             | up/down | fold_change | log2(fold_change) | P value     |
|-----------------------------|--------------------------|---------|-------------|-------------------|-------------|
| hsa-miR-92b-5p_R-2          | AGGGACGGGACGCGGTGCAG     | down    | 0.02        | -5.72             | 1.08484E-10 |
| hsa-miR-107_R-2             | AGCAGCATTGTACAGGGCTAT    | down    | 0.14        | -2.85             | 1.60212E-09 |
| mmr-miR-1839_L+1R-1         | AAGGTAGATAGAACAGGTCTTG   | down    | 0.15        | -2.73             | 4.94069E-09 |
| hsa-miR-126-3p_R-1          | TCGTACCGTGAGTAATAATGC    | down    | 0.35        | -1.50             | 1.70747E-08 |
| hsa-mir-1304-p5             | CGGTTTGAGGCTACAGTGAGAT   | down    | 0.13        | -2.97             | 1.70821E-08 |
| PC-5p-49096_267             | AGCCTGGAAGCTGGAGCCTGCAG  | down    | 0.07        | -3.85             | 2.61249E-08 |
| hsa-miR-324-3p_L-3R+1       | ACTGCCCCAGGTGCTGCTGGA    | down    | 0.07        | -3.86             | 3.15182E-08 |
| hsa-mir-8086-p3_1ss11AG     | AGGCTGGAGTGCAGTGCC       | down    | 0.02        | -5.47             | 3.38742E-08 |
| hsa-miR-223-5p_R+2          | CGTGTATTTGACAAGCTGAGTTGG | down    | 0.21        | -2.23             | 8.03675E-08 |
| hsa-miR-103a-3p             | AGCAGCATTGTACAGGGCTATGA  | down    | 0.19        | -2.42             | 8.29712E-08 |
| hsa-miR-95-3p_R-1           | TTCAACGGGTATTTATTGAGC    | down    | 0.04        | -4.82             | 1.01821E-07 |
| hsa-miR-6735-5p_R-4         | CAGGGCAGAGGGCACAGGAAT    | down    | 0.10        | -3.33             | 1.05287E-07 |
| PC-5p-42143_323             | TTAGTGGCTCCCTCTGCCTGCA   | down    | 0.07        | -3.88             | 1.38295E-07 |
| hsa-miR-1285-3p_R-2         | TCTGGGCAACAAAGTGAGAC     | down    | 0.13        | -2.98             | 1.6504E-07  |
| hsa-miR-576-3p_R-1          | AAGATGTGGAAAAATTGGAAT    | down    | 0.09        | -3.43             | 1.72125E-07 |
| hsa-let-7c-5p_R-4           | TGAGGTAGTAGGTTGTAT       | down    | 0.26        | -1.95             | 1.76247E-07 |
| mmu-miR-2137_L-2_1ss16AG    | CGGCGGGAGCCCCGGGGAG      | down    | 0.06        | -3.95             | 1.83002E-07 |
| hsa-miR-320a-3p             | AAAAGCTGGGTTGAGAGGGCGA   | down    | 0.21        | -2.25             | 2.01609E-07 |
| mmu-miR-2137_L-2R-1_1ss16AG | CGGCGGGAGCCCCGGGGA       | down    | 0.13        | -2.89             | 2.04631E-07 |
| hsa-miR-550a-3-5p           | AGTGCCTGAGGGAGTAAGAG     | down    | 0.09        | -3.47             | 3.42866E-07 |
| hsa-miR-3140-3p_R-1         | AGCTTTTGGGAATTCAGGTAG    | down    | 0.10        | -3.39             | 3.63602E-07 |
| hsa-miR-3127-5p             | ATCAGGGCTTGTGGAATGGGAAG  | down    | 0.04        | -4.73             | 4.80872E-07 |

|                     |                          |      |      |       |             |
|---------------------|--------------------------|------|------|-------|-------------|
| hsa-miR-363-3p_R-1  | AATTGCACGGTATCCATCTGT    | down | 0.18 | -2.43 | 4.82696E-07 |
| hsa-miR-598-3p      | TACGTCATCGTTGTCATCGTCA   | down | 0.17 | -2.55 | 4.83891E-07 |
| hsa-miR-511-5p      | GTGTCTTTTGCTCTGCAGTCA    | down | 0.00 | -8.38 | 4.90864E-07 |
| PC-3p-2703_5627     | TTTGGGGATTCTAAGAGGAAG    | down | 0.08 | -3.66 | 5.20708E-07 |
| hsa-miR-361-3p_R+1  | TCCCCCAGGTGTGATTCTGATTTG | down | 0.14 | -2.82 | 5.32283E-07 |
| hsa-miR-190b-5p     | TGATATGTTTGATATTGGGTTG   | down | 0.02 | -5.45 | 5.94992E-07 |
| hsa-miR-21-5p       | TAGCTTATCAGACTGATGTTGA   | down | 0.19 | -2.36 | 6.89989E-07 |
| hsa-miR-106b-5p_R-1 | TAAAGTGCTGACAGTGCAGA     | down | 0.06 | -4.18 | 7.31391E-07 |
| hsa-miR-25-3p       | CATTGCACTTGTCTCGGTCTGA   | down | 0.08 | -3.58 | 7.32155E-07 |
| hsa-miR-1180-3p_R-2 | TTTCCGGCTCGCGTGGGTGT     | down | 0.15 | -2.76 | 9.19536E-07 |
| hsa-miR-199b-5p_R-1 | CCCAGTGTTTAGACTATCTGTT   | down | 0.13 | -2.91 | 9.24587E-07 |
| hsa-miR-542-3p_R-2  | TGTGACAGATTGATAACTGA     | down | 0.11 | -3.18 | 9.29355E-07 |
| hsa-let-7i-5p       | TGAGGTAGTAGTTTGTGCTGTT   | down | 0.19 | -2.39 | 1.06339E-06 |
| hsa-miR-532-5p      | CATGCCTTGAGTGTAGGACCGT   | down | 0.09 | -3.44 | 1.36228E-06 |
| ocu-miR-502b-3p_R-3 | AATGCACCTGGGCAAGGATTT    | down | -inf | -inf  | 1.76924E-06 |
| hsa-miR-660-5p_R+1  | TACCCATTGCATATCGGAGTTGT  | down | 0.04 | -4.53 | 3.1283E-06  |
| hsa-miR-210-3p      | CTGTGCGTGTGACAGCGGCTGA   | down | 0.08 | -3.59 | 3.52357E-06 |
| hsa-miR-106b-3p_R-2 | CCGCACTGTGGGTACTTGCT     | down | 0.20 | -2.33 | 3.53265E-06 |
| hsa-miR-92a-1-5p    | AGGTTGGGATCGGTTGCAATGCT  | down | 0.12 | -3.06 | 3.77561E-06 |
| hsa-miR-16-5p       | TAGCAGCACGTAAATATTGGCG   | down | 0.11 | -3.12 | 4.07521E-06 |
| hsa-miR-6866-5p_R-2 | TTAGAGGCTGGAATAGAGATT    | down | 0.09 | -3.50 | 4.15803E-06 |
| hsa-miR-4732-5p     | TGTAGAGCAGGGAGCAGGAAGCT  | down | 0.13 | -2.92 | 4.16916E-06 |
| hsa-miR-652-3p_R+1  | AATGGCGCCACTAGGGTTGTGT   | down | 0.51 | -0.98 | 4.49954E-06 |
| hsa-miR-140-3p_R+1  | TACCACAGGGTAGAACCACGGA   | down | 0.12 | -3.02 | 4.78143E-06 |
| hsa-miR-181b-5p_R-2 | AACATTCATTGCTGTCGGTGG    | down | 0.23 | -2.10 | 4.83834E-06 |
| hsa-miR-18a-5p      | TAAGGTGCATCTAGTGCAGATAG  | down | 0.13 | -2.89 | 5.05749E-06 |

|                                |                         |      |      |       |             |
|--------------------------------|-------------------------|------|------|-------|-------------|
| hsa-miR-7-5p_R-1               | TGGAAGACTAGTGATTTTGTGT  | down | 0.10 | -3.38 | 5.21475E-06 |
| hsa-miR-500a-3p_L+1R-1_1ss22TA | AATGCACCTGGGCAAGGATTCA  | down | 0.25 | -2.02 | 5.25802E-06 |
| hsa-miR-502-3p                 | AATGCACCTGGGCAAGGATTCA  | down | 0.25 | -2.02 | 5.25802E-06 |
| hsa-miR-3200-3p_R-1            | CACCTTGCGCTACTCAGGTCT   | down | 0.04 | -4.56 | 5.56206E-06 |
| hsa-miR-424-5p_R-1             | CAGCAGCAATTCATGTTTTGA   | down | 0.10 | -3.35 | 6.6359E-06  |
| hsa-miR-15a-5p_R-1             | TAGCAGCACATAATGGTTTGT   | down | 0.09 | -3.47 | 6.66011E-06 |
| hsa-miR-10b-5p_R-1             | TACCCTGTAGAACCGAATTTGT  | down | 0.17 | -2.54 | 8.13965E-06 |
| hsa-miR-451a_R-1               | AAACCGTTACCATTACTGAGT   | down | 0.13 | -2.90 | 8.97423E-06 |
| hsa-miR-4772-3p                | CCTGCAACTTTGCCTGATCAGA  | down | 0.02 | -5.80 | 8.98577E-06 |
| mmu-miR-92a-3p_R+1             | TATTGCACTTGTCCCGGCCTGA  | down | 0.18 | -2.48 | 9.21432E-06 |
| bta-mir-2887-1-p5_1ss5CA       | GGGAAACGGGGCGCGGCC      | down | 0.08 | -3.71 | 9.24033E-06 |
| hsa-miR-150-3p_R-2             | CTGGTACAGGCCTGGGGGAC    | down | 0.09 | -3.42 | 9.27176E-06 |
| hsa-miR-32-3p_R-1              | CAATTTAGTGTGTGTGATATT   | down | 0.10 | -3.35 | 9.6495E-06  |
| hsa-miR-5010-5p                | AGGGGGATGGCAGAGCAAAATT  | down | 0.13 | -2.95 | 9.7424E-06  |
| hsa-miR-326_R+1                | CCTCTGGGCCCTTCCTCCAGT   | up   | 5.85 | 2.55  | 1.02372E-05 |
| hsa-miR-130a-3p                | CAGTGCAATGTTAAAAGGGCAT  | down | 0.32 | -1.65 | 1.0416E-05  |
| hsa-miR-942-3p                 | CACATGGCCGAAACAGAGAAGT  | down | 0.03 | -5.16 | 1.08226E-05 |
| hsa-miR-214-3p_R-1             | ACAGCAGGCACAGACAGGCAG   | down | 0.04 | -4.67 | 1.10697E-05 |
| hsa-mir-451a-p3                | TTTAGTAATGGTAATGGTTCT   | down | 0.06 | -4.02 | 1.1414E-05  |
| hsa-miR-33a-5p_R-1             | GTGCATTGTAGTTGCATTGC    | down | 0.02 | -5.87 | 1.19204E-05 |
| hsa-miR-185-5p                 | TGGAGAGAAAGGCAGTTCCTGA  | down | 0.06 | -4.03 | 1.20408E-05 |
| hsa-miR-106a-3p_L+2R-3         | TACTGCAATGTAAGCACTTCT   | down | 0.09 | -3.52 | 1.20674E-05 |
| PC-3p-39847_345                | ACATATAGTGAATTCTGGGATT  | down | 0.07 | -3.91 | 1.21495E-05 |
| hsa-miR-101-5p_L+1R-1          | TCAGTTATCACAGTGCTGATGC  | down | 0.03 | -4.97 | 1.27642E-05 |
| hsa-miR-3909                   | TGTCCTCTAGGGCCTGCAGTCT  | down | 0.10 | -3.28 | 1.31832E-05 |
| hsa-miR-30e-5p_R+2             | TGTAACATCCTTGACTGGAAGCT | down | 0.39 | -1.36 | 1.39977E-05 |

|                             |                          |      |      |       |             |
|-----------------------------|--------------------------|------|------|-------|-------------|
| hsa-let-7i-3p_R-1           | CTGCGCAAGCTACTGCCTTGC    | down | 0.10 | -3.32 | 1.44451E-05 |
| hsa-miR-503-5p_R-2_1ss21CA  | TAGCAGCGGGAACAGTTCTGA    | down | 0.10 | -3.30 | 1.47992E-05 |
| hsa-miR-342-5p              | AGGGGTGCTATCTGTGATTGA    | down | 0.17 | -2.57 | 1.51845E-05 |
| hsa-miR-15b-3p_R-1          | CGAATCATTATTTGCTGCTCT    | down | 0.18 | -2.45 | 1.54743E-05 |
| hsa-miR-942-5p_L-2R+1       | TTCTCTGTTTTGGCCATGTGT    | down | 0.26 | -1.92 | 1.5824E-05  |
| hsa-miR-31-5p_R-2           | AGGCAAGATGCTGGCATAG      | down | -inf | -inf  | 1.62293E-05 |
| hsa-miR-4772-5p             | TGATCAGGCAAATTCAGACT     | down | 0.05 | -4.32 | 1.80286E-05 |
| hsa-miR-424-3p              | CAAAACGTGAGGCGCTGCTAT    | down | 0.22 | -2.17 | 1.92314E-05 |
| hsa-miR-29c-3p_R-1          | TAGCACCATTGAAATCGGTT     | down | 0.15 | -2.77 | 1.97776E-05 |
| hsa-miR-34c-5p              | AGGCAGTGTAGTTAGCTGATTGC  | down | -inf | -inf  | 2.01481E-05 |
| hsa-miR-30a-3p_R-1          | CTTTCAGTCGGATGTTTGCAG    | down | 0.19 | -2.40 | 2.0875E-05  |
| hsa-miR-93-5p               | CAAAGTGCTGTTTCGTGCAGGTAG | down | 0.12 | -3.11 | 2.12153E-05 |
| hsa-miR-20b-3p_R-3          | ACTGTAGTATGGGCACTTC      | down | 0.10 | -3.32 | 2.17505E-05 |
| hsa-miR-486-5p              | TCCTGTACTGAGCTGCCCCGAG   | down | 0.22 | -2.16 | 2.18094E-05 |
| hsa-let-7g-5p               | TGAGGTAGTAGTTTGTACAGTT   | down | 0.15 | -2.73 | 2.23756E-05 |
| mmu-miR-2137_L-1R-1_1ss16AG | CCGGCGGGAGCCCCGGGGA      | down | 0.10 | -3.38 | 2.27005E-05 |
| hsa-mir-619-p5_1ss3AG       | AAGTGCTGGGATTACAGG       | down | 0.08 | -3.67 | 2.29723E-05 |
| hsa-miR-450a-5p_R-2         | TTTTGCGATGTGTTTCTAAT     | down | 0.33 | -1.60 | 2.4688E-05  |
| hsa-miR-642a-3p_R-1         | AGACACATTTGGAGAGGGAAC    | down | 0.04 | -4.54 | 2.4886E-05  |
| hsa-miR-3912-3p             | TAACGCATAATATGGACATGT    | down | -inf | -inf  | 2.70745E-05 |
| hsa-miR-582-5p_R-1          | TTACAGTTGTTCAACCAGTTAC   | down | 0.11 | -3.15 | 2.96624E-05 |
| hsa-miR-497-5p              | CAGCAGCACACTGTGGTTTGT    | down | 0.03 | -5.26 | 3.00718E-05 |
| hsa-miR-197-5p_R-2          | CGGGTAGAGAGGGCAGTGGGA    | down | 0.02 | -5.32 | 3.09763E-05 |
| hsa-miR-132-5p              | ACCGTGGCTTTTCGATTGTTACT  | down | 0.02 | -5.41 | 3.31751E-05 |
| hsa-miR-610                 | TGAGCTAAATGTGTGCTGGGA    | down | 0.07 | -3.87 | 3.51409E-05 |
| hsa-miR-16-2-3p_L+1R-2      | ACCAATATTACTGTGCTGCTT    | down | 0.22 | -2.16 | 3.76187E-05 |

|                             |                         |      |      |       |             |
|-----------------------------|-------------------------|------|------|-------|-------------|
| hsa-miR-425-5p              | AATGACACGATCACTCCCGTTGA | down | 0.42 | -1.25 | 3.79344E-05 |
| hsa-miR-3913-5p             | TTTGGGACTGATCTTGATGTCT  | down | 0.14 | -2.79 | 4.00854E-05 |
| hsa-miR-188-5p_R+1          | CATCCCTTGCATGGTGGAGGGT  | down | -inf | -inf  | 4.01972E-05 |
| pal-mir-9993a-p3_1ss2GA     | AAATCTCGGTGGGACCTC      | down | -inf | -inf  | 4.32534E-05 |
| hsa-miR-340-5p              | TTATAAAGCAATGAGACTGATT  | down | 0.41 | -1.28 | 4.68301E-05 |
| hsa-miR-2110_R+1            | TTGGGGAAACGGCCGCTGAGTGA | down | 0.34 | -1.57 | 4.69082E-05 |
| hsa-mir-5100-p3_1ss17TC     | ATCCCAGCGGTGCCTCCA      | down | 0.04 | -4.75 | 4.73183E-05 |
| hsa-miR-20b-5p              | CAAAGTGCTCATAGTGCAGGTAG | down | 0.03 | -5.16 | 4.74926E-05 |
| hsa-miR-320e_L+1R+3_1ss17AG | AAAAGCTGGGTTGAGAGGGTGA  | down | 0.20 | -2.29 | 4.97585E-05 |
| hsa-miR-499a-5p             | TTAAGACTTGCAGTGATGTTT   | down | 0.07 | -3.84 | 5.04029E-05 |
| hsa-miR-30c-2-3p            | CTGGGAGAAGGCTGTTTACTCT  | down | 0.17 | -2.56 | 5.07818E-05 |
| hsa-miR-3164                | TGTGACTTTAAGGGAAATGGCG  | down | -inf | -inf  | 5.52437E-05 |
| hsa-miR-6815-5p_R-2         | TAGGTGGCGCCGGAGGAGTCA   | down | 0.14 | -2.80 | 5.52543E-05 |
| hsa-miR-32-5p_R-2           | TATTGCACACTACTAAGTTG    | down | 0.18 | -2.51 | 5.74948E-05 |
| hsa-miR-629-5p              | TGGGTTTACGTTGGGAGAACT   | down | 0.09 | -3.45 | 5.91126E-05 |
| hsa-miR-15b-5p              | TAGCAGCACATCATGGTTTACA  | down | 0.33 | -1.62 | 6.13089E-05 |
| hsa-miR-3934-5p             | TCAGGTGTGGAAACTGAGGCAG  | down | -inf | -inf  | 6.21003E-05 |
| hsa-miR-92a-3p              | TATTGCACTTGTCCCGCCTGT   | down | 0.30 | -1.76 | 6.42886E-05 |
| hsa-miR-6805-5p             | TAGGGGGCGGCTTGTGGAGTGT  | down | 0.01 | -6.22 | 6.88969E-05 |
| hsa-miR-128-3p              | TCACAGTGAACCGGTCTCTTT   | down | 0.38 | -1.41 | 7.06564E-05 |
| hsa-miR-548ak_L-1_1ss9CT    | AAAGTAATTGCGTTTTTTGA    | down | 0.10 | -3.36 | 7.45441E-05 |
| hsa-miR-1255b-5p            | CGGATGAGCAAAGAAAGTGGTT  | down | 0.06 | -3.97 | 7.63209E-05 |
| hsa-miR-22-3p               | AAGCTGCCAGTTGAAGAACTGT  | down | 0.14 | -2.85 | 7.85996E-05 |
| hsa-miR-6513-5p             | TTTGGGATTGACGCCACATGTCT | down | 0.09 | -3.47 | 7.86044E-05 |
| hsa-miR-363-5p              | CGGGTGGATCACGATGCAATTT  | down | 0.02 | -5.35 | 8.56723E-05 |
| hsa-miR-4508_L+2R-1         | AAGCGGGGCTGGGCGCGC      | down | 0.16 | -2.64 | 8.60579E-05 |

|                             |                          |      |      |       |             |
|-----------------------------|--------------------------|------|------|-------|-------------|
| mmu-miR-6238_L-1R-2_1ss12TC | TATTAGTCAGCGGAGGAAA      | down | -inf | -inf  | 8.79199E-05 |
| hsa-miR-29b-3p_R-3          | TAGCACCATTTGAAATCAGT     | down | 0.23 | -2.14 | 8.96515E-05 |
| hsa-miR-17-5p               | CAAAGTGCTTACAGTGCAGGTAG  | down | 0.11 | -3.21 | 9.01134E-05 |
| hsa-miR-106a-5p_1ss1AC      | CAAAGTGCTTACAGTGCAGGTAG  | down | 0.11 | -3.21 | 9.01134E-05 |
| bta-miR-1246_L+1R-2         | AAATGGATTTTTGGAGCA       | down | -inf | -inf  | 9.22023E-05 |
| hsa-miR-196b-5p_R-1         | TAGGTAGTTTCCTGTTGTTGG    | down | 0.18 | -2.44 | 9.43642E-05 |
| hsa-miR-651-5p_R-1          | TTTAGGATAAGCTTGACTTTT    | down | 0.17 | -2.59 | 9.4942E-05  |
| hsa-miR-130b-3p             | CAGTGCAATGATGAAAGGGCAT   | down | 0.12 | -3.08 | 9.80967E-05 |
| hsa-miR-1976_R+2            | CCTCCTGCCCTCCTTGCTGTAG   | down | 0.24 | -2.06 | 0.000103276 |
| hsa-miR-1273c_R-1           | GGCGACAAAACGAGACCCTGT    | down | 0.22 | -2.20 | 0.000105249 |
| hsa-miR-143-3p              | TGAGATGAAGCACTGTAGCTC    | down | 0.36 | -1.46 | 0.000112498 |
| hsa-miR-548ay-5p_R-1        | AAAAGTAATTGTGGTTTTTG     | down | 0.14 | -2.84 | 0.000113348 |
| ppy-miR-548a                | AAAAGTAATTGTGGTTTTTG     | down | 0.14 | -2.84 | 0.000113348 |
| hsa-miR-548ad-5p            | AAAAGTAATTGTGGTTTTTG     | down | 0.14 | -2.84 | 0.000113348 |
| hsa-miR-18a-3p_1ss23GA      | ACTGCCCTAAGTGCTCCTTCTGA  | down | 0.21 | -2.28 | 0.000121698 |
| hsa-miR-29a-3p_R-1          | TAGCACCATCTGAAATCGGTT    | down | 0.10 | -3.39 | 0.000123064 |
| hsa-miR-548bc               | AAAAACTGTGATTACTTTTTGC   | down | 0.05 | -4.21 | 0.000124707 |
| hsa-miR-1294_R-2            | TGTGAGGTTGGCATTGTTGT     | down | 0.08 | -3.65 | 0.000127528 |
| hsa-let-7b-5p               | TGAGGTAGTAGGTTGTGTGGTT   | down | 0.23 | -2.13 | 0.000128104 |
| hsa-miR-101-3p_R+1          | TACAGTACTGTGATAACTGAAG   | down | 0.06 | -4.06 | 0.00012996  |
| hsa-miR-450b-5p_R-1         | TTTTGCAATATGTTCTGAAT     | down | 0.11 | -3.23 | 0.000132441 |
| hsa-miR-486-3p              | CGGGGCAGCTCAGTACAGGAT    | down | 0.15 | -2.79 | 0.000134294 |
| PC-3p-81170_138             | TGGCAAGGGCTGTGAAGAGA     | down | 0.03 | -5.23 | 0.000139892 |
| hsa-miR-20a-5p              | TAAAGTGCTTATAGTGCAGGTAG  | down | 0.09 | -3.41 | 0.000144961 |
| hsa-miR-28-5p_R-1           | AAGGAGCTCACAGTCTATTGA    | down | 0.30 | -1.75 | 0.000146627 |
| hsa-miR-6780a-5p_L-1R+2     | TGGGAGGGAAGACAGCTGGAGAGT | down | 0.03 | -5.16 | 0.000149219 |



|                             |                        |      |      |       |             |
|-----------------------------|------------------------|------|------|-------|-------------|
| hsa-miR-3143_R-4            | ATAACATTGTAAAGCGCTTCT  | down | 0.15 | -2.76 | 0.000150339 |
| hsa-miR-150-5p              | TCTCCCAACCCTTGTACCAGTG | down | 0.17 | -2.58 | 0.000151282 |
| hsa-miR-19b-3p              | TGTGCAAATCCATGCAAACTGA | down | 0.18 | -2.44 | 0.000155629 |
| hsa-let-7d-5p               | AGAGGTAGTAGGTTGCATAGTT | down | 0.27 | -1.88 | 0.00016187  |
| hsa-miR-183-5p_L-1          | ATGGCACTGGTAGAATTCCT   | down | 0.16 | -2.65 | 0.000167171 |
| hsa-miR-6842-3p             | TTGGCTGGTCTCTGCTCCGCAG | down | 0.09 | -3.49 | 0.000171886 |
| hsa-miR-4488_L+2R-1         | GGAGGGGGCGGGCTCCGGC    | down | 0.03 | -4.92 | 0.000172589 |
| mmu-miR-3964_L+1_1ss6GA     | CATAAAGTAGAAAGCACTAAA  | down | -inf | -inf  | 0.000177503 |
| hsa-miR-182-5p_R-4          | TTTGCAATGGTAGAACTCA    | down | 0.11 | -3.12 | 0.000182013 |
| hsa-miR-3150b-3p            | TGAGGAGATCGTCGAGGTTGG  | down | -inf | -inf  | 0.000182708 |
| bta-miR-11987_L-2R-1_1ss8TA | AGGAACTCTGGTGGAGG      | down | 0.04 | -4.48 | 0.000188308 |
| hsa-mir-3665-p5_1ss2CA      | GAGGGCGGCGGCGGCGGC     | down | -inf | -inf  | 0.000205891 |
| hsa-miR-3944-5p             | TGTGCAGCAGGCCAACCGAGA  | down | -inf | -inf  | 0.000220135 |
| hsa-miR-18b-5p_R-3          | TAAGGTGCATCTAGTGCAGT   | down | 0.15 | -2.71 | 0.000223971 |
| PC-5p-37928_367             | TGAGGGGAGAGAGCGAGACT   | down | 0.02 | -5.47 | 0.000227953 |
| hsa-miR-4732-3p             | GCCCTGACCTGTCCTGTTCTG  | down | 0.24 | -2.05 | 0.000231939 |
| hsa-miR-625-5p_R-1          | AGGGGGAAAGTTCTATAGTC   | down | 0.14 | -2.86 | 0.000232995 |
| hsa-miR-19a-3p              | TGTGCAAATCTATGCAAACTGA | down | 0.14 | -2.84 | 0.000235482 |
| hsa-miR-1268b_R-2           | CGGGCGTGGTGGTGGGGG     | down | -inf | -inf  | 0.000241138 |
| hsa-miR-1268a               | CGGGCGTGGTGGTGGGGG     | down | -inf | -inf  | 0.000241138 |
| hsa-miR-148b-3p             | TCAGTGCATCACAGAACTTTGT | down | 0.52 | -0.95 | 0.000260204 |
| hsa-miR-10a-3p_R-1          | CAAATTCGTATCTAGGGGAAT  | down | 0.01 | -6.13 | 0.000260251 |
| hsa-miR-1246_L-2R+1         | TGGATTTTTGGAGCAGGG     | down | 0.02 | -5.86 | 0.000261333 |
| hsa-miR-548ac_L-1           | AAAAACCGGCAATTACTTTTG  | down | 0.02 | -5.88 | 0.000266219 |
| pal-miR-9993a-3p_1ss11GA    | ATCTCGGTGGAACCTCCA     | down | 0.31 | -1.69 | 0.000266323 |
| pal-miR-9995-3p             | ATCTCGGTGGAACCTCCA     | down | 0.31 | -1.69 | 0.000266323 |

|                          |                          |      |      |       |             |
|--------------------------|--------------------------|------|------|-------|-------------|
| hsa-miR-514a-3p_R-1      | ATTGACACTTCTGTGAGTAG     | down | -inf | -inf  | 0.000273831 |
| hsa-miR-22-5p_R-1        | AGTTCTTCAGTGGCAAGCTTT    | down | 0.10 | -3.39 | 0.000283163 |
| hsa-miR-144-3p_R-1       | TACAGTATAGATGATGTAC      | down | 0.29 | -1.79 | 0.000285132 |
| bta-miR-1246_L+1R+3      | AAATGGATTTTTGGAGCAGGGAG  | down | 0.02 | -5.55 | 0.000290931 |
| PC-5p-60328_204          | AGAATATGGGAGTCTGTGGCT    | down | 0.15 | -2.76 | 0.000293917 |
| hsa-miR-9-3p             | ATAAAGCTAGATAACCGAAAGT   | down | 0.10 | -3.28 | 0.000315379 |
| hsa-miR-345-5p_R+1       | GCTGACTCCTAGTCCAGGGCTCT  | down | 0.48 | -1.06 | 0.000319448 |
| hsa-miR-501-5p_R+2       | AATCCTTTGTCCCTGGGTGAGAGT | down | 0.01 | -6.45 | 0.000324049 |
| hsa-mir-6511a-3-p5       | CTGCAGGCAGAAGTGGGGCTGA   | down | -inf | -inf  | 0.000326857 |
| hsa-mir-6511b-1-p5       | CTGCAGGCAGAAGTGGGGCTGA   | down | -inf | -inf  | 0.000326857 |
| hsa-miR-203a-3p_R-2      | GTGAAATGTTTAGGACCACT     | down | 0.18 | -2.48 | 0.0003504   |
| hsa-miR-548at-5p_R-2     | AAAAGTTATTGCGGTTTTGG     | down | 0.03 | -5.14 | 0.000350577 |
| hsa-miR-9985_R-1_1ss16CT | TTCACAGTGGCTAAGTTA       | down | 0.03 | -5.03 | 0.000353695 |
| hsa-miR-5581-3p          | TTCCATGCCTCCTAGAAGTTCC   | down | -inf | -inf  | 0.000356248 |
| hsa-miR-3124-5p          | TTTCGCGGGCGAAGGCAAAGTC   | down | 0.08 | -3.61 | 0.000362379 |
| bta-miR-1246_L+1R-1      | AAATGGATTTTTGGAGCAG      | down | 0.14 | -2.80 | 0.000363923 |
| bta-miR-150              | TCTCCCAACCCTTGTACCAGTGT  | down | 0.22 | -2.19 | 0.000379353 |
| hsa-miR-338-3p_R+1       | TCCAGCATCAGTGATTTTTGTTGA | down | 0.20 | -2.34 | 0.000383316 |
| bta-miR-11987_L-2_1ss8TA | AGGAAACTCTGGTGGAGGT      | down | 0.05 | -4.45 | 0.000383475 |
| hsa-miR-3130-3p          | GCTGCACCGGAGACTGGGTAA    | down | 0.09 | -3.52 | 0.000402804 |
| hsa-miR-1290_1ss13TG     | TGGATTTTTGGAGCAGGGA      | down | 0.08 | -3.63 | 0.000403901 |
| hsa-miR-7706_R-1         | TGAAGCGCCTGTGCTCTGCCGAG  | down | 0.37 | -1.44 | 0.000408641 |
| hsa-miR-29b-2-5p_R+1     | CTGGTTTCACATGGTGGCTTAGA  | down | 0.17 | -2.54 | 0.00041214  |
| hsa-miR-548au-5p_R-1     | AAAAGTAATTGCGGTTTTTG     | down | 0.17 | -2.55 | 0.000412952 |
| hsa-miR-548am-5p_R-2     | AAAAGTAATTGCGGTTTTTG     | down | 0.17 | -2.55 | 0.000412952 |
| hsa-miR-574-5p           | TGAGTGTGTGTGTGTGAGTGTGT  | down | 0.18 | -2.47 | 0.000413532 |

|                             |                          |      |       |       |             |
|-----------------------------|--------------------------|------|-------|-------|-------------|
| hsa-miR-16-1-3p             | CCAGTATTA ACTGTGCTGCTGA  | down | 0.21  | -2.24 | 0.000415088 |
| mmu-miR-146a-5p_R+1         | TGAGAACTGAATTCCATGGGTTT  | up   | 3.75  | 1.91  | 0.000440424 |
| hsa-miR-618_R-2             | AAACTCTACTTGTCCCTTCTGA   | down | -inf  | -inf  | 0.000442692 |
| hsa-miR-26a-5p              | TTCAAGTAATCCAGGATAGGCT   | up   | 3.79  | 1.92  | 0.000454235 |
| hsa-miR-3202_L+2R-3         | TATGGAAGGGAGAAGAGCTTT    | down | -inf  | -inf  | 0.000465686 |
| hsa-miR-450a-2-3p_L-1       | TTGGGGACATTTTGCATTCAT    | down | 0.02  | -5.75 | 0.000496953 |
| hsa-miR-215-5p_R-1          | ATGACCTATGAATTGACAGA     | down | 0.01  | -7.23 | 0.000537576 |
| mml-miR-378d_L-1R+1_1ss21CG | CTGGACTTGGAGTCAGAAGGAG   | down | -inf  | -inf  | 0.000569743 |
| mmu-miR-6238_L-1R-3_1ss12TC | TATTAGTCAGCGGAGGAA       | down | -inf  | -inf  | 0.000584533 |
| hsa-miR-423-5p              | TGAGGGGCAGAGAGCGAGACTTT  | down | 0.55  | -0.86 | 0.000602025 |
| hsa-miR-183-3p_L-1          | TGAATTACCGAAGGGCCATAA    | down | 0.10  | -3.37 | 0.000604478 |
| hsa-miR-3611_R-2            | TTGTGAAGAAAGAAATTCT      | down | 0.04  | -4.69 | 0.000607847 |
| hsa-miR-362-5p_R-2          | AATCCTTGGAACCTAGGTGTGA   | down | 0.17  | -2.59 | 0.000608832 |
| hsa-miR-3688-3p_R-2         | TATGGAAAGACTTTGCCACT     | down | 0.21  | -2.28 | 0.000613947 |
| PC-5p-120168_84             | GGCAGAGAGGAGGAGAGAATTG   | down | -inf  | -inf  | 0.000615084 |
| hsa-mir-3922-p3             | TGTGGGACTTCTGGCCTTGA     | down | 0.07  | -3.74 | 0.000634045 |
| hsa-miR-548q_L-1R+1         | CTGGTGCAAAAAGTAATGGCGGT  | down | -inf  | -inf  | 0.000643992 |
| hsa-miR-30a-5p_R+2          | TGTAAACATCCTCGACTGGAAGCT | down | 0.18  | -2.44 | 0.000650598 |
| hsa-miR-152-3p              | TCAGTG CATGACAGAACTTGG   | down | 0.35  | -1.50 | 0.000681248 |
| hsa-miR-550a-5p_R-2         | AGTGCCTGAGGGAGTAAGAGC    | down | 0.22  | -2.16 | 0.000689858 |
| hsa-miR-10b-3p_L-1          | CAGATTCGATTCTAGGGGAAT    | down | 0.10  | -3.28 | 0.000695003 |
| hsa-miR-548e-5p             | CAAAAGCAATCGCGGTTTTTGC   | down | 0.18  | -2.44 | 0.000701408 |
| hsa-miR-1303_R-2            | TTTAGAGACGGGTCTTGCT      | down | 0.01  | -6.15 | 0.000708581 |
| hsa-miR-4433b-5p_R+1        | ATGTCCCACCCCACTCCTGTT    | up   | 14.54 | 3.86  | 0.000714369 |
| hsa-miR-3615_R+1            | TCTCTCGGCTCCTCGCGGCTCG   | down | 0.40  | -1.32 | 0.000714975 |
| hsa-miR-4466_R+2            | GGGTGCGGGCCGCGGGGTC      | down | -inf  | -inf  | 0.000718557 |

|                               |                            |      |      |       |             |
|-------------------------------|----------------------------|------|------|-------|-------------|
| hsa-miR-3064-5p               | TCTGGCTGTTGTGGTGTGCAA      | down | 0.12 | -3.01 | 0.0007615   |
| hsa-mir-3196-p5_1ss4GT        | GGGTCGGGGCGGCAGGGGCC       | down | 0.01 | -7.50 | 0.000768424 |
| hsa-miR-142-3p_R-1            | TGTAGTGTTCCTACTTTATGG      | down | 0.33 | -1.62 | 0.000787849 |
| pal-mir-10001-p5_1ss1AT       | TGGGCGGGCGGGGCCGGGGG       | down | 0.00 | -9.96 | 0.000792689 |
| hsa-miR-7-1-3p                | CAACAAATCACAGTCTGCCATA     | down | 0.29 | -1.77 | 0.000798761 |
| hsa-miR-147b-3p               | GTGTGCGGAAATGCTTCTGCT      | down | -inf | -inf  | 0.000837268 |
| hsa-miR-181a-5p               | AACATTCAACGCTGTCCGGTGTGAGT | down | 0.64 | -0.64 | 0.000838619 |
| hsa-miR-450a-1-3p             | ATTGGGAACATTTTGCATGTAT     | down | 0.02 | -5.46 | 0.000842992 |
| bta-miR-150_1ss10CT           | TCTCCCAACTCTTGTACCAGTGT    | down | -inf | -inf  | 0.000855105 |
| hsa-let-7a-5p                 | TGAGGTAGTAGGTTGTATAGTT     | down | 0.25 | -2.02 | 0.000862466 |
| mdo-miR-106-5p                | AAAAGTGCTTATAGTGCAGGTAG    | down | -inf | -inf  | 0.000866975 |
| hsa-miR-335-5p                | TCAAGAGCAATAACGAAAAATGT    | up   | 1.92 | 0.94  | 0.000872125 |
| hsa-mir-5684-p3_1ss16CG       | TGCCCAGGCTGGAGTGCAG        | down | -inf | -inf  | 0.000872613 |
| hsa-miR-580-3p                | TTGAGAATGATGAATCATTAGG     | down | -inf | -inf  | 0.000942594 |
| hsa-miR-624-5p_R-1            | TAGTACCAGTACCTTGTGTTC      | down | 0.28 | -1.86 | 0.000945669 |
| hsa-miR-151b_R+2              | TCGAGGAGCTCACAGTCTAG       | down | 0.48 | -1.07 | 0.000995322 |
| hsa-miR-6503-3p_L-1R-1_1ss7AG | GGACTGGGATGCAGACCTC        | down | 0.01 | -7.18 | 0.001015093 |
| hsa-miR-371b-5p               | ACTCAAAAGATGGCGGCACTTT     | down | 0.20 | -2.35 | 0.00102028  |
| hsa-miR-1250-5p               | ACGGTGCTGGATGTGGCCTTT      | down | 0.17 | -2.57 | 0.001033156 |
| hsa-miR-3942-5p_L-1           | AGCAATACTGTTACCTGAAAT      | down | 0.18 | -2.46 | 0.001062149 |
| bta-miR-1246_L-1R+3           | ATGGATTTTTGGAGCAGGGAG      | down | 0.02 | -5.62 | 0.001062681 |
| hsa-miR-5001-3p_R-1           | TTCTGCCTCTGTCCAGGTCCT      | down | 0.20 | -2.33 | 0.001068956 |
| hsa-miR-676-3p_R+1            | CTGTCCCTAAGGTTGTTGAGTTT    | down | -inf | -inf  | 0.001106478 |
| ssc-mir-4332-p5_1ss9CT        | GGGTGGGGTCCGGCGGGGG        | down | 0.00 | -7.97 | 0.001110239 |
| hsa-miR-1301-3p_R+1           | TTGCAGCTGCCTGGGAGTGACTTCT  | up   | 3.45 | 1.79  | 0.001126926 |
| mmu-mir-6236-p3_1ss2AG_2      | CGGCCGTCGCCGGCAGTC         | down | 0.17 | -2.59 | 0.001137489 |

|                              |                          |      |       |       |             |
|------------------------------|--------------------------|------|-------|-------|-------------|
| mmu-mir-6236-p3_1ss2AG_1     | AGCTAGCCCTGAAAATGGAT     | down | 0.17  | -2.59 | 0.001137489 |
| hsa-miR-509-3p               | TGATTGGTACGTCTGTGGGTAG   | down | -inf  | -inf  | 0.001144557 |
| PC-5p-35367_398              | ACAGGATGCAGTGCTCAGTGA    | down | 0.02  | -5.42 | 0.001178901 |
| hsa-miR-616-3p_L+1R-3        | AAGTCATTGGAGGGTTTGAG     | down | 0.05  | -4.24 | 0.001202079 |
| hsa-miR-6852-5p              | CCCTGGGGTTCTGAGGACATG    | up   | 5.12  | 2.36  | 0.001272002 |
| hsa-miR-659-5p               | AGGACCTTCCCTGAACCAAGGA   | down | -inf  | -inf  | 0.001307356 |
| pal-miR-9993a-3p             | ATCTCGGTGGGACCTCCA       | down | 0.19  | -2.40 | 0.00131013  |
| hsa-miR-362-3p_1ss22AT       | AACACACCTATTCAAGGATTCT   | down | -inf  | -inf  | 0.001324293 |
| hsa-miR-6764-5p              | TCCCAGGGTCTGGTCAGAGTTG   | down | -inf  | -inf  | 0.001348013 |
| hsa-mir-3199-1-p5            | ACTGCCTTAGGAGAAAGTTTCT   | down | -inf  | -inf  | 0.001353807 |
| hsa-mir-3199-2-p5            | ACTGCCTTAGGAGAAAGTTTCT   | down | -inf  | -inf  | 0.001353807 |
| hsa-miR-628-5p               | ATGCTGACATATTTACTAGAGG   | down | 0.18  | -2.51 | 0.001380983 |
| hsa-miR-582-3p               | TAACTGGTTGAACAACTGAACC   | down | 0.04  | -4.70 | 0.00139723  |
| hsa-miR-205-5p_R-1           | TCCTTCATTCCACCGGAGTCT    | down | 0.16  | -2.65 | 0.001425488 |
| PC-3p-62500_195              | AAATCTCGCTGGGGCCTCCA     | down | -inf  | -inf  | 0.001438588 |
| hsa-miR-4511_R+1             | GAAGAACTGTTGCATTTGCCCTG  | down | 0.03  | -5.29 | 0.001464203 |
| hsa-miR-548n                 | CAAAAGTAATTGTGGATTTTGT   | down | 0.19  | -2.40 | 0.001480629 |
| hsa-miR-3200-5p              | AATCTGAGAAGGCGCACAAAGGT  | down | 0.10  | -3.31 | 0.001494014 |
| hsa-miR-10400-5p_R-3_1ss12GA | CGGCGGCGGCGACTCTGG       | down | -inf  | -inf  | 0.001552286 |
| hsa-miR-26b-5p_R+1           | TTCAAGTAATTCAGGATAGGTT   | down | 0.29  | -1.78 | 0.001570283 |
| hsa-miR-516a-5p_R-1          | TTCTCGAGGAAAGAAGCACTTT   | down | 0.01  | -6.50 | 0.001580756 |
| hsa-mir-2110-p3              | CACCGCGGTCTTTTCCCTCCCACT | up   | 32.66 | 5.03  | 0.001624901 |
| hsa-miR-4672                 | TTACACAGCTGGACAGAGGCA    | down | -inf  | -inf  | 0.001631834 |
| PC-5p-273115_36              | TGTGAGGAAGCTGTTGTTGCT    | down | 0.11  | -3.12 | 0.001746197 |
| hsa-miR-744-5p_R-1           | TGCGGGGCTAGGGCTAACAGC    | up   | 2.94  | 1.56  | 0.00176165  |
| hsa-miR-660-3p_R-2           | ACCTCCTGTGTGCATGGAT      | down | -inf  | -inf  | 0.001846501 |

|                                |                          |      |        |       |             |
|--------------------------------|--------------------------|------|--------|-------|-------------|
| hsa-miR-1306-3p_R+4            | ACGTTGGCTCTGGTGGTGATGT   | down | 0.34   | -1.55 | 0.001850341 |
| hsa-miR-204-3p                 | GCTGGGAAGGCAAAGGGACGT    | down | 0.01   | -6.17 | 0.002012073 |
| ppy-mir-1268-p3_1ss8TC         | AGCTACTCGGGAGGCTGA       | down | -inf   | -inf  | 0.00204359  |
| hsa-miR-2277-3p_R+1            | TGACAGCGCCCTGCCTGGCTCG   | down | 0.08   | -3.60 | 0.002061216 |
| hsa-miR-2115-3p                | CATCAGAATTCATGGAGGCTAG   | down | -inf   | -inf  | 0.002074986 |
| PC-5p-146_367656               | TTCTCTTTCCGGCACCA        | up   | 326.24 | 8.35  | 0.002090502 |
| hsa-miR-30c-5p_R+1             | TGTAAACATCCTACACTCTCAGCT | up   | 2.13   | 1.09  | 0.002157759 |
| hsa-miR-5000-3p_R-1            | TCAGGACACTTCTGAACCTGG    | down | -inf   | -inf  | 0.002158351 |
| PC-5p-31521_454                | TTGCAAGCAACACTCTGTGG     | down | 0.20   | -2.30 | 0.002207087 |
| PC-3p-111035_92                | TAAAAACCGTGACTACTTCT     | down | 0.02   | -5.57 | 0.002241571 |
| hsa-miR-1228-5p                | GTGGGCGGGGGCAGGTGTGTG    | down | -inf   | -inf  | 0.002260147 |
| PC-3p-228736_42                | ACGGAAACGGAAACAAAGCTTT   | down | -inf   | -inf  | 0.002296962 |
| hsa-miR-124-3p_R-3             | TAAGGCACGCGGTGAATGC      | down | -inf   | -inf  | 0.002309275 |
| hsa-miR-548az-5p_L-2R+1_1ss8GA | AAAGTAATTGTGGTTTTTGCT    | down | 0.01   | -7.29 | 0.002310638 |
| hsa-mir-548ac-p5_1ss6TA        | AAAGTAATTGTGGTTTTTGCT    | down | 0.01   | -7.29 | 0.002310638 |
| hsa-miR-155-5p_R-1             | TTAATGCTAATCGTGATAGGGGT  | down | 0.47   | -1.08 | 0.002388473 |
| bta-miR-378_L-2R+1             | TGGACTTGGAGTCAGAAGGCT    | down | 0.10   | -3.32 | 0.002430625 |
| bta-mir-1246-p3_1ss18AG_2      | TGGATTTTTGGAGCAGGGAG     | down | 0.01   | -6.21 | 0.002435808 |
| bta-mir-1246-p3_1ss18AG_1      | AAATGGATTTTTGGAGCGG      | down | 0.01   | -6.21 | 0.002435808 |
| hsa-miR-3146_R+1               | CATGCTAGGATAGAAAGAATGGG  | down | -inf   | -inf  | 0.002537175 |
| pal-miR-9995-3p_1ss15TA        | ATCTCGGTGGAACCACCA       | down | 0.02   | -6.01 | 0.002542022 |
| ssc-mir-4332-p5_1ss12CT        | CGGGGTGGGGTTCGGCGGGGG    | down | 0.09   | -3.55 | 0.002571338 |
| hsa-miR-4646-5p                | ACTGGGAAGAGGAGCTGAGGGA   | down | 0.12   | -3.03 | 0.002581087 |
| hsa-miR-126-5p                 | CATTATTACTTTTGGTACGCG    | up   | 1.63   | 0.71  | 0.002612256 |
| hsa-miR-191-5p                 | CAACGGAATCCCAAAGCAGCTG   | up   | 5.69   | 2.51  | 0.002616433 |
| hsa-miR-15a-3p_1ss22AT         | CAGGCCATATTGTGCTGCCTCT   | down | 0.25   | -1.98 | 0.002640489 |

|                          |                          |      |       |       |             |
|--------------------------|--------------------------|------|-------|-------|-------------|
| hsa-miR-4639-5p          | TTGCTAAGTAGGCTGAGATTGA   | down | -inf  | -inf  | 0.002846895 |
| hsa-miR-675-3p_R+2       | CTGTATGCCCTCACCGCTCAGC   | down | -inf  | -inf  | 0.00286346  |
| PC-5p-386146_24          | TTTAGCACGGACATGGTTCT     | down | -inf  | -inf  | 0.002865472 |
| hsa-miR-4440_R+1         | TGTCGTGGGGCTTGCTGGCTTGA  | down | -inf  | -inf  | 0.002890446 |
| hsa-miR-7850-5p          | GTTTGGACATAGTGTGGCTGG    | down | -inf  | -inf  | 0.002900266 |
| hsa-miR-4498_R+1         | TGGGCTGGCAGGGCAAGTGCTGC  | down | -inf  | -inf  | 0.002949151 |
| pal-miR-9993b-3p_1ss1AT  | TTCTCGCTGGGGCCTCCA       | down | 0.19  | -2.42 | 0.002952461 |
| hsa-mir-3929-p3_1ss19TG  | AGCACTTTGGGAGGCTGAG      | down | -inf  | -inf  | 0.002959226 |
| hsa-miR-96-5p_R-2        | TTTGGCACTAGCACATTTTTTG   | down | 0.29  | -1.80 | 0.00297723  |
| hsa-miR-202-3p           | AGAGGTATAGGGCATGGGAA     | down | -inf  | -inf  | 0.002987385 |
| hsa-miR-3157-3p          | CTGCCCTAGTCTAGCTGAAGCT   | down | 0.19  | -2.43 | 0.00299454  |
| hsa-miR-29a-5p_R-1       | ACTGATTTCTTTTGGTGTTC     | down | 0.06  | -4.07 | 0.003023378 |
| hsa-miR-584-3p_R-2       | TCAGTTCCAGGCCAACCCAGG    | down | -inf  | -inf  | 0.003028548 |
| hsa-miR-98-5p            | TGAGGTAGTAAGTTGTATTGTT   | down | 0.45  | -1.17 | 0.003091851 |
| hsa-miR-1260b_1ss9AG     | ATCCCACCGCTGCCACCAT      | up   | 5.60  | 2.48  | 0.003129626 |
| hsa-miR-3136-5p_R-1      | CTGACTGAATAGGTAGGGTCAT   | down | -inf  | -inf  | 0.003185159 |
| cja-miR-3135_L-1_1ss10CG | AGGCTGGAGTGCACTGGCG      | down | -inf  | -inf  | 0.003203611 |
| hsa-miR-370-3p           | GCCTGCTGGGGTGGAACTGGT    | up   | 10.79 | 3.43  | 0.003206543 |
| PC-3p-54257_235          | GTTCGACTCCCGGTATGGGAACCA | down | 0.17  | -2.52 | 0.003210127 |
| hsa-miR-130b-5p_R+1      | ACTCTTTCCCTGTTGCACTACT   | up   | 10.91 | 3.45  | 0.003236588 |
| PC-5p-189265_50          | TTGTGGTCTGGGGTCTTGGGC    | down | -inf  | -inf  | 0.003310691 |
| hsa-miR-4797-3p_L-2R+2   | TCAGTAAGTGGCACTCTGTCT    | down | -inf  | -inf  | 0.003321988 |
| hsa-miR-127-3p           | TCGGATCCGTCTGAGCTTGGCT   | up   | 27.12 | 4.76  | 0.003354275 |
| hsa-miR-4667-5p_R-2      | ACTGGGGAGCAGAAGGAGAA     | down | 0.20  | -2.34 | 0.003390368 |
| hsa-miR-4742-3p_R-1      | TCTGTATTCTCCTTTGCCCTGCA  | down | 0.23  | -2.13 | 0.00340597  |
| hsa-miR-151a-5p          | TCGAGGAGCTCACAGTCTAGT    | up   | 1.94  | 0.96  | 0.00352844  |

|                             |                        |      |      |       |             |
|-----------------------------|------------------------|------|------|-------|-------------|
| mmu-miR-8117_L-1R-1_1ss15GA | CTCGTGTGGAACAAAAGGG    | down | 0.13 | -2.93 | 0.003536616 |
| bta-mir-1246-p5_1ss16AG     | GATTTTTGGAGCAGGGAG     | down | 0.01 | -6.62 | 0.00353788  |
| hsa-miR-3117-3p_R+1         | ATAGGACTCATATAGTGCCAGG | down | -inf | -inf  | 0.003564807 |
| mmu-mir-6236-p3_1ss16GC     | ATGGCGCTGGAGCGTCGGG    | down | -inf | -inf  | 0.003584861 |
| hsa-miR-11401_R+1           | TCACGTCTGCGGCTGTCACGT  | down | 0.11 | -3.24 | 0.003622872 |
| hsa-miR-589-5p_R-1          | TGAGAACCACGTCTGCTCTGA  | down | 0.49 | -1.02 | 0.003623274 |
| PC-5p-73128_158             | GGCGGGCCATCACTGTTGGAG  | down | -inf | -inf  | 0.00368543  |
| mdo-miR-22-3p               | AAGCTGCCAGTTGAAGAACTGC | down | 0.18 | -2.44 | 0.003716117 |
| hsa-miR-409-3p              | GAATGTTGCTCGGTGAACCCCT | up   | 4.27 | 2.10  | 0.003718992 |
| hsa-miR-378j_R+1_1ss14CT    | ACTGGATTTGGAGTCAGAAG   | down | -inf | -inf  | 0.003722753 |
| hsa-mir-548al-p3_1ss7GC     | AAAAACCGCAATGACTTTTG   | down | 0.04 | -4.83 | 0.003729868 |
| hsa-miR-329-3p              | AACACACCTGGTTAACCTCTTT | up   | 4.46 | 2.16  | 0.003737157 |
| mmu-miR-452-3p_1ss20GA      | TCAGTCTCATCTGCAAAGAAGT | down | 0.02 | -5.69 | 0.003769591 |
| hsa-miR-6500-3p             | ACACTTGTTGGGATGACCTGC  | down | 0.09 | -3.52 | 0.003783276 |
| hsa-miR-328-3p              | CTGGCCCTCTCTGCCCTTCCGT | up   | 8.84 | 3.14  | 0.003801632 |
| hsa-mir-597-p3              | AGTGGTTCTCTTGTGGCTCA   | down | -inf | -inf  | 0.003822119 |
| hsa-miR-452-5p_R+1          | AACTGTTTGAGAGGAAACTGAG | down | 0.23 | -2.12 | 0.00386016  |
| hsa-miR-508-3p_R-3          | TGATTGTAGCCTTTTGGAGT   | down | -inf | -inf  | 0.003884399 |
| PC-3p-37476_372             | ATGTTATGATGATGGGCGAAA  | down | -inf | -inf  | 0.003888273 |
| PC-3p-29103_499             | CTTGAGACTCTGGGTCAGT    | down | -inf | -inf  | 0.003901713 |
| hsa-miR-4637                | TACTAACTGCAGATTCAAGTGA | down | -inf | -inf  | 0.003934464 |
| eca-mir-8969-p3_1ss14GT     | GGTGGTTCAGTGGTAGAA     | down | 0.07 | -3.80 | 0.004010694 |
| hsa-let-7f-5p               | TGAGGTAGTAGATTGTATAGTT | down | 0.34 | -1.58 | 0.004015423 |
| hsa-miR-3064-3p_L+1R-4      | TTTGCCACACTGCAACACCT   | down | -inf | -inf  | 0.004016411 |
| hsa-miR-4999-5p             | TGCTGTATTGTCAGGTAGTGA  | down | -inf | -inf  | 0.004032134 |
| pal-mir-9226-p5_1ss18CT     | TCCCTGTTTCGGGCGCCATT   | up   | 4.29 | 2.10  | 0.004115545 |



|                               |                          |      |       |        |             |
|-------------------------------|--------------------------|------|-------|--------|-------------|
| hsa-miR-4755-3p               | AGCCAGGCTCTGAAGGGAAAGT   | down | -inf  | -inf   | 0.004151231 |
| hsa-miR-1224-5p_R+2           | GTGAGGACTCGGGAGGTGGAG    | down | 0.09  | -3.45  | 0.004221213 |
| hsa-mir-3648-2-p5             | GGGGGAGCCGCGGGGATC       | down | 0.09  | -3.50  | 0.004354447 |
| PC-3p-33579_423               | TTCGCTGGGAATTCAGCCTCT    | down | 0.06  | -4.17  | 0.004360602 |
| hsa-miR-7704_R-1              | CGGGGTTCGGCGGCGACGT      | down | 0.24  | -2.07  | 0.004409855 |
| hsa-mir-653-p5                | TTGAAACAATCTCTACTGAAC    | down | -inf  | -inf   | 0.004420893 |
| hsa-miR-30b-5p                | TGTA AACATCCTACACTCAGCT  | up   | 2.18  | 1.12   | 0.004473191 |
| PC-3p-23817_616               | TTGCTGGGAAAGGGAGAAGTTC   | down | 0.19  | -2.40  | 0.004503405 |
| hsa-miR-6767-5p               | TCGCAGACAGGGACACATGGAGA  | down | 0.07  | -3.89  | 0.00456342  |
| hsa-miR-378a-5p               | CTCCTGACTCCAGGTCCTGTGT   | down | 0.18  | -2.44  | 0.004569989 |
| hsa-miR-340-3p_R+1            | TCCGTCTCAGTTACTTTATAGCC  | up   | 11.29 | 3.50   | 0.004579682 |
| hsa-miR-643                   | ACTTGTATGCTAGCTCAGGTAG   | down | 0.07  | -3.77  | 0.004585324 |
| hsa-miR-671-5p_R+1            | AGGAAGCCCTGGAGGGGCTGGAGG | down | 0.06  | -4.04  | 0.004589911 |
| hsa-miR-139-5p                | TCTACAGTGCACGTGTCTCCAGT  | down | 0.44  | -1.18  | 0.004687775 |
| hsa-miR-501-3p                | AATGCACCCGGGCAAGGATTCT   | down | 0.49  | -1.04  | 0.004726515 |
| hsa-miR-516b-5p               | ATCTGGAGGTAAGAAGCACTTT   | down | -inf  | -inf   | 0.004727218 |
| hsa-miR-11400_1ss20TC         | TCGGCTGTGTATCTCTGTGCC    | up   | 3.87  | 1.95   | 0.004928951 |
| hsa-miR-550b-2-5p_L-3_1ss21CG | TGCCTGAGGGAGTAAGAGA      | down | 0.06  | -4.02  | 0.004939498 |
| PC-5p-62477_195               | CAGAGTGGGGTTTTGCAGTC     | down | 0.13  | -2.93  | 0.004959317 |
| hsa-miR-199a-5p               | CCCAGTGTTTCAGACTACCTGTTC | up   | 9.81  | 3.29   | 0.004965905 |
| PC-3p-129317_77               | TAGGTCACTGGGGTCAGAG      | down | 0.19  | -2.42  | 0.005004825 |
| hsa-miR-873-3p_L-1            | GAGACTGATGAGTTCCCGGGA    | down | 0.01  | -6.27  | 0.005024181 |
| hsa-miR-548b-5p_R-4           | AAAAGTAATTGTGGTTTT       | down | 0.03  | -4.97  | 0.005185825 |
| hsa-miR-4326_R+3              | TGTTCCCTCTGTCTCCAGACTCT  | down | 0.35  | -1.51  | 0.005196965 |
| bta-miR-378_R+1_1ss22CA       | ACTGGACTTGGAGTCAGAAGGAT  | down | 0.00  | -10.07 | 0.005233455 |
| hsa-miR-6509-5p_R-1           | ATTAGGTAGTGGCAGTGGAA     | down | -inf  | -inf   | 0.005284102 |

|                          |                          |      |       |       |             |
|--------------------------|--------------------------|------|-------|-------|-------------|
| hsa-miR-3691-5p_L+1R-2   | TAGTGGATGATGGAGACTCGGT   | down | -inf  | -inf  | 0.005325661 |
| hsa-miR-513c-5p_R-2      | TTCTCAAGGAGGTGTCGTTT     | down | -inf  | -inf  | 0.005360135 |
| hsa-miR-30d-5p_R+2       | TGTAACATCCCCGACTGGAAGCT  | down | 0.72  | -0.47 | 0.005415705 |
| PC-5p-190163_50          | TTAAGTGGGAAACGATGTG      | down | -inf  | -inf  | 0.005587299 |
| hsa-miR-335-3p           | TTTTTCATTATTGCTCCTGACC   | up   | 18.45 | 4.21  | 0.005699661 |
| hsa-miR-214-5p_1ss22CA   | TGCCTGTCTACACTTGCTGTGA   | down | 0.20  | -2.35 | 0.005722329 |
| hsa-miR-3682-3p          | TGATGATACAGGTGGAGGTAG    | down | -inf  | -inf  | 0.005728604 |
| hsa-miR-548ai_R-2        | AAAGGTAATTGCAGTTTTTC     | down | -inf  | -inf  | 0.005847297 |
| eca-miR-451_R-2          | AAACCGTTACCATTACTGTG     | down | 0.18  | -2.44 | 0.005867644 |
| mmu-mir-3535-p3          | CCTCTAGATAGTCAAGTTCTGATC | down | -inf  | -inf  | 0.00589662  |
| hsa-miR-146a-5p          | TGAGAACTGAATTCATGGGTT    | up   | 3.30  | 1.72  | 0.006033463 |
| PC-5p-104097_99          | TGGAGAAAGGACTTCAGGGAGT   | down | -inf  | -inf  | 0.006136062 |
| hsa-miR-378c_R-5         | ACTGGACTTGGAGTCAGAAG     | down | 0.03  | -5.03 | 0.006245196 |
| hsa-miR-222-5p_R-1       | CTCAGTAGCCAGTGTAGATCC    | down | 0.07  | -3.94 | 0.006267183 |
| hsa-miR-218-5p_R-1       | TTGTGCTTGATCTAACCATG     | down | 0.22  | -2.18 | 0.006270965 |
| hsa-miR-181c-3p_L-1R+1   | ACCATCGACC GTT GAGTGGACC | up   | 3.95  | 1.98  | 0.006277796 |
| hsa-miR-6884-5p          | AGAGGCTGAGAAGGTGATGTTG   | down | -inf  | -inf  | 0.006330237 |
| hsa-miR-320d_R-1         | AAAAGCTGGGTTGAGAGG       | down | 0.07  | -3.93 | 0.006434751 |
| hsa-miR-548l_R-1         | AAAAGTATTTGCGGGTTTTGT    | down | 0.28  | -1.86 | 0.006564142 |
| hsa-miR-194-5p_R-1       | TGTAACAGCAACTCCATGTGG    | down | 0.05  | -4.43 | 0.006729091 |
| hsa-miR-873-5p_L+1R-3    | TGCAGGAAC TTGTGAGTCT     | down | 0.02  | -5.46 | 0.006942793 |
| efu-miR-9226_L-2_1ss22GA | AAGTCCCTGTTCCGGGCGCCA    | down | -inf  | -inf  | 0.007010783 |
| PC-5p-295297_33          | ACAGCGAGAGGCAGCTCTGG     | down | 0.19  | -2.39 | 0.007173272 |
| hsa-miR-1289_R-1         | TGGAGTCCAGGAATCTGCATTT   | down | 0.13  | -2.91 | 0.007265983 |
| hsa-miR-190a-5p_R+1      | TGATATGTTTGATATATTAGGTT  | down | 0.02  | -6.01 | 0.00743068  |
| PC-3p-147533_66          | TAACTTGTGTGACTTTGGGCCGA  | down | -inf  | -inf  | 0.007459496 |

|                              |                         |      |       |       |             |
|------------------------------|-------------------------|------|-------|-------|-------------|
| hsa-miR-125a-5p_R-2          | TCCCTGAGACCCTTTAACCTGT  | up   | 2.64  | 1.40  | 0.007505459 |
| hsa-miR-500b-5p_L+1R+3       | TAATCCTTGCTACCTGGGTGAG  | down | 0.03  | -4.94 | 0.007536963 |
| mmu-miR-5126_L-4_1ss18CT     | GCGGGGCCGGGGGTGGGG      | down | -inf  | -inf  | 0.007543519 |
| hsa-miR-378a-3p              | ACTGGACTTGGAGTCAGAAGGC  | down | 0.05  | -4.41 | 0.00756731  |
| hsa-miR-223-3p_R+1           | TGTCAGTTTGTCAAATACCCCAA | down | 0.57  | -0.81 | 0.00759517  |
| hsa-miR-5010-3p_R+1          | TTTTGTGTCTCCCATTCCCAGT  | down | 0.12  | -3.03 | 0.007636142 |
| PC-5p-278729_35              | AGGCAGGGTCGGGTAGGGGGCA  | down | -inf  | -inf  | 0.007810898 |
| mmu-miR-501-3p_R-1           | AATGCACCCGGGCAAGGATTT   | down | 0.10  | -3.31 | 0.007841223 |
| hsa-miR-320c_R-1             | AAAAGCTGGTTGAGAGGG      | down | 0.12  | -3.06 | 0.008007438 |
| hsa-miR-548ar-5p_R-1_1ss10TC | AAAAGTAATCGCAGTTTTTG    | down | -inf  | -inf  | 0.008227982 |
| hsa-miR-548x-5p_L-3_1ss13TC  | AAAAGTAATCGCAGTTTTTG    | down | -inf  | -inf  | 0.008227982 |
| hsa-miR-548h-5p_R-2_1ss13GA  | AAAAGTAATCGCAGTTTTTG    | down | -inf  | -inf  | 0.008227982 |
| hsa-mir-548f-1-p5_1ss11AG    | AAAAGTAATCGCAGTTTTTG    | down | -inf  | -inf  | 0.008227982 |
| hsa-mir-548i-1-p5            | TTAGGTTGGTGCAAAAGTAA    | down | -inf  | -inf  | 0.008233578 |
| hsa-mir-548f-4-p5            | TTAGGTTGGTGCAAAAGTAA    | down | -inf  | -inf  | 0.008233578 |
| hsa-mir-548y-p5              | TTAGGTTGGTGCAAAAGTAA    | down | -inf  | -inf  | 0.008233578 |
| hsa-miR-423-3p               | AGCTCGGTCTGAGGCCCTCAGT  | up   | 1.71  | 0.77  | 0.008332745 |
| hsa-miR-4781-3p_L-2R+3       | TGTTGGAATCCTCGCTAGAGCGT | down | 0.07  | -3.92 | 0.008337751 |
| hsa-miR-3163_R-1             | TATAAAATGAGGCGAGTAAGA   | down | -inf  | -inf  | 0.008357575 |
| hsa-miR-4489                 | TGGGGCTAGTGATGCAGGACG   | down | -inf  | -inf  | 0.008385017 |
| hsa-mir-548v-p5              | AAAAGTAATTGCGGTTTT      | down | 0.03  | -4.84 | 0.008385348 |
| PC-5p-64281_188              | AGCAGCATTGTACAGGGAAA    | down | -inf  | -inf  | 0.008498819 |
| hsa-miR-654-3p_R-2           | TATGTCTGCTGACCATCACC    | up   | 16.93 | 4.08  | 0.008503838 |
| hsa-miR-429                  | TAATACTGTCTGGTAAAACCGT  | down | 0.05  | -4.40 | 0.008712457 |
| PC-5p-4861_2738              | GCCTGTA CTCTTTATCCT     | up   | 19.66 | 4.30  | 0.008730005 |
| PC-3p-4861_2738              | GCCTGTA CTCTTTATCCT     | up   | 19.66 | 4.30  | 0.008730005 |

|                             |                          |      |       |       |             |
|-----------------------------|--------------------------|------|-------|-------|-------------|
| hsa-miR-145-5p_R-1          | GTCCAGTTTTCCCAGGAATCCC   | down | 0.40  | -1.33 | 0.008737173 |
| hsa-miR-1270                | CTGGAGATATGGAAGAGCTGTGT  | down | 0.18  | -2.48 | 0.008744543 |
| hsa-miR-4474-3p_R-2         | TTGTGGCTGGTCATGAGGCT     | down | 0.03  | -4.91 | 0.008766563 |
| hsa-miR-6875-5p             | TGAGGGACCCAGGACAGGAGA    | down | -inf  | -inf  | 0.008813581 |
| hsa-miR-374a-3p             | CTTATCAGATTGTATTGTAATT   | down | 0.33  | -1.62 | 0.008857548 |
| hsa-miR-27a-5p              | AGGGCTTAGCTGCTTGTGAGCA   | down | 0.30  | -1.75 | 0.008884418 |
| hsa-mir-600-p5              | CATAGGAAGGCTCTTGTCTGT    | down | -inf  | -inf  | 0.008907558 |
| mml-miR-378d_L-1R-1_1ss21CT | CTGGACTTGGAGTCAGAAGT     | down | -inf  | -inf  | 0.009059891 |
| hsa-miR-3176_R+2            | ACTGGCCTGGGACTACCGGGA    | down | 0.12  | -3.01 | 0.009062435 |
| hsa-miR-151a-3p             | CTAGACTGAAGCTCCTTGAGG    | up   | 1.42  | 0.51  | 0.009113039 |
| hsa-mir-3929-p5_1ss5AT      | CACCTGTAATCCCAGCACTT     | down | -inf  | -inf  | 0.009279969 |
| hsa-miR-7976_R+1            | TGCCCTGAGACTTTTGCTCT     | down | 0.36  | -1.46 | 0.009308272 |
| mml-miR-378d_R-1_1ss21CT    | ACTGGACTTGGAGTCAGAAGT    | down | 0.01  | -6.37 | 0.009350738 |
| hsa-miR-148a-3p             | TCAGTGCACACTACAGAACTTTGT | down | 0.25  | -2.01 | 0.009379144 |
| hsa-miR-6750-5p_L-1R-3      | AGGGAACAGCTGGGTGAGCT     | down | 0.02  | -5.60 | 0.00939065  |
| hsa-miR-576-5p              | ATTCTAATTTCTCCACGTCTTT   | down | 0.30  | -1.74 | 0.009422867 |
| hsa-miR-331-5p_R-2          | CTAGGTATGGTCCCAGGGAT     | down | 0.57  | -0.82 | 0.009473956 |
| PC-5p-87005_125             | GAAGAAGGCTAGGGGACAG      | down | -inf  | -inf  | 0.009518621 |
| mmu-miR-5119_L+1R-2         | TCATCTCATCCTGGGGCT       | up   | 16.16 | 4.01  | 0.009560608 |
| hsa-miR-320b_R-2            | AAAAGCTGGGTTGAGAGGGC     | down | 0.16  | -2.66 | 0.009598398 |
| hsa-miR-6862-5p             | CGGGCATGCTGGGAGAGACTTT   | down | -inf  | -inf  | 0.009659058 |
| mmu-miR-146a-5p_R+2         | TGAGAACTGAATTCCATGGGTTAA | up   | 2.65  | 1.40  | 0.009791564 |
| hsa-mir-5695-p5             | TCTAGATTCTTCTTGGCCTCT    | down | 0.20  | -2.36 | 0.00992675  |
| hsa-miR-125b-1-3p_R-2       | ACGGGTTAGGCTCTTGGGAG     | down | 0.03  | -5.26 | 0.010010017 |
| PC-3p-136753_72             | TGTCTAGACAAGGCTGGGGAA    | down | 0.06  | -3.98 | 0.010034156 |
| hsa-miR-4479_R-1            | CGCGCGGCCGTGCTCGGAGCA    | down | -inf  | -inf  | 0.01011644  |

|                            |                         |      |       |       |             |
|----------------------------|-------------------------|------|-------|-------|-------------|
| PC-3p-143720_68            | ATTTGGCCTTTTATGTTCTTGA  | down | -inf  | -inf  | 0.010200788 |
| hsa-miR-485-3p             | GTCATACACGGCTCTCCTCTCT  | up   | 15.92 | 3.99  | 0.01023646  |
| PC-3p-128622_77            | TCTTGACTAGCTTGCTGTTT    | down | -inf  | -inf  | 0.010277156 |
| hsa-miR-548h-3p_R-1_1ss4AG | CAAGAACC GCAATTACTTTTGC | down | 0.30  | -1.74 | 0.010307196 |
| hsa-miR-125b-5p_R-2        | TCCCTGAGACCCTAACTTGT    | down | 0.40  | -1.33 | 0.010459053 |
| hsa-miR-3605-3p_R-2        | CCTCCGTGTTACCTGTCCTCT   | down | 0.28  | -1.82 | 0.010470439 |
| hsa-miR-3173-3p_L-1        | AAGGAGGAAATAGGCAGGCCA   | down | 0.12  | -3.01 | 0.010494915 |
| PC-3p-82011_136            | TCCTGGAGCTGGGCAGATGGGA  | down | 0.10  | -3.26 | 0.010515913 |
| hsa-miR-2115-5p_R-2        | AGCTTCCATGACTCCTGATG    | down | -inf  | -inf  | 0.010555463 |
| hsa-miR-132-3p             | TAACAGTCTACAGCCATGGTCCG | down | 0.33  | -1.62 | 0.010586861 |
| hsa-miR-219a-5p            | TGATTGTCCAAACGCAATTCT   | down | -inf  | -inf  | 0.010596858 |
| hsa-miR-4731-5p_R-1        | TGCTGGGGGCCACATGAGTGT   | down | -inf  | -inf  | 0.010684256 |
| hsa-miR-378g_R+2           | ACTGGGCTTGGAGTCAGAAGGC  | down | 0.05  | -4.27 | 0.010837116 |
| hsa-miR-1273h-3p           | CTGCAGACTCGACCTCCCAGGC  | up   | 4.74  | 2.24  | 0.010876503 |
| hsa-miR-4659a-3p           | TTTCTTCTTAGACATGGCAACG  | down | 0.31  | -1.67 | 0.010883123 |
| hsa-miR-4484_L+2R-4        | AAAAAAGGCGGGAGAAGC      | down | 0.11  | -3.22 | 0.01092867  |
| PC-3p-365143_26            | TTGAGGTCGGACATGGTGGCTT  | down | -inf  | -inf  | 0.010977239 |
| hsa-miR-518e-5p_R-1        | CTCTAGAGGGAAGCGCTTTCT   | down | -inf  | -inf  | 0.010985773 |
| hsa-miR-708-3p_R-2         | CAACTAGACTGTGAGCTTCT    | down | -inf  | -inf  | 0.01123105  |
| PC-5p-146020_66            | AGGGACGGCCGGGGGCAAG     | down | -inf  | -inf  | 0.011262946 |
| PC-3p-126191_79            | TCTCTGGGGGTGACTGTCCGT   | down | -inf  | -inf  | 0.011318607 |
| hsa-miR-4516_R+1           | GGGAGAAGGGTCGGGGCG      | down | -inf  | -inf  | 0.011332419 |
| hsa-mir-3159-p3_1ss21TC    | TCACGCCTGTAATCCCAGCACT  | down | 0.08  | -3.64 | 0.011423422 |
| PC-5p-111666_91            | TGGAGAGAAAGGCAGTTAG     | down | 0.05  | -4.41 | 0.011546117 |
| hsa-miR-425-3p_L+1R-1      | CATCGGGAATGTCGTGCCGCC   | up   | 1.93  | 0.95  | 0.011556862 |
| hsa-miR-1262               | ATGGGTGAATTTGTAGAAGGAT  | down | -inf  | -inf  | 0.011623409 |

|                          |                          |      |        |       |             |
|--------------------------|--------------------------|------|--------|-------|-------------|
| hsa-miR-3155b_R+3        | CCAGGCTCTGCAGTGGGAACT    | down | 0.04   | -4.71 | 0.011660596 |
| hsa-miR-193a-5p          | TGGGTCTTTGCGGGCGAGATGA   | down | 0.04   | -4.59 | 0.011709687 |
| hsa-miR-6514-5p_R-1      | TATGGAGTGGACTTTCAGCTGG   | down | 0.07   | -3.89 | 0.011917295 |
| hsa-miR-3135a_R+1        | TGCCTAGGCTGAGACTGCAGTGA  | down | 0.16   | -2.63 | 0.012344809 |
| hsa-miR-4492_L+1         | CGGGGCTGGGCGCGCGCC       | down | -inf   | -inf  | 0.012515868 |
| PC-5p-481280_16          | TATGATGGCTGTAACAAGAAATTT | down | -inf   | -inf  | 0.01264186  |
| PC-3p-366052_26          | ATTTGCTGTTAAGATATGGGAT   | down | -inf   | -inf  | 0.012859622 |
| bta-miR-11971_R-1        | TGAGGGGCAGAGAGTGAGA      | down | -inf   | -inf  | 0.012866422 |
| mmu-miR-5100_R-1         | TCCAATCCCAGCGGTGCCTC     | down | 0.23   | -2.14 | 0.013180537 |
| hsa-let-7f-1-3p_1ss22CT  | CTATACAATCTATTGCCTTCCT   | down | 0.29   | -1.78 | 0.013226436 |
| hsa-miR-627-3p           | TCTTTTCTTTGAGACTCACT     | up   | 6.24   | 2.64  | 0.013534682 |
| PC-3p-41831_326          | AATCCTCTCGCCCCGACC       | up   | 220.31 | 7.78  | 0.013689904 |
| hsa-miR-6783-5p          | TAGGGGAAAAGTCCTGATCCGG   | down | -inf   | -inf  | 0.013827488 |
| hsa-miR-135a-5p          | TATGGCTTTTTATTCCTATGTGA  | down | 0.10   | -3.29 | 0.013912366 |
| PC-3p-90463_119          | AACAGCGGGGAAAGAAGAC      | down | -inf   | -inf  | 0.014153839 |
| hsa-miR-6807-5p          | GTGAGCCAGTGGAATGGAGAGG   | down | -inf   | -inf  | 0.014199506 |
| hsa-miR-1296-5p          | TTAGGGCCCTGGCTCCATCTCC   | up   | 5.28   | 2.40  | 0.014244124 |
| hsa-miR-4467_R-1         | TGGCGGCGGTAGTTATGGGCT    | down | 0.02   | -5.61 | 0.014573936 |
| hsa-miR-1287-5p          | TGCTGGATCAGTGGTTCGAGTC   | down | 0.46   | -1.13 | 0.014593124 |
| hsa-miR-127-5p_R+1       | CTGAAGCTCAGAGGGCTCTGATT  | down | 0.32   | -1.65 | 0.014690381 |
| hsa-miR-181b-2-3p_L+1R+1 | ACTCACTGATCAATGAATGCAA   | down | 0.16   | -2.68 | 0.015056383 |
| hsa-miR-548ay-3p_R-1     | CAAAACCGCGATTACTCTTGC    | down | 0.20   | -2.29 | 0.015146434 |
| hsa-miR-222-3p_R+3       | AGCTACATCTGGCTACTGGGTCTC | up   | 1.62   | 0.69  | 0.015267023 |
| hsa-miR-4503_R-1         | TTTAAGCAGGAAATAGAATTT    | down | -inf   | -inf  | 0.015451393 |
| PC-3p-4764_2788          | GAGGGCGCGCGGGTTCGGG      | down | 0.05   | -4.36 | 0.015534764 |
| hsa-miR-202-5p_R-1       | TTCCTATGCATATACTTCTTT    | down | -inf   | -inf  | 0.015569007 |

|                             |                         |      |       |       |             |
|-----------------------------|-------------------------|------|-------|-------|-------------|
| hsa-miR-6763-5p_L+2R+1      | TCCTGGGGAGTGGCTGGGGAGC  | down | 0.08  | -3.59 | 0.015614703 |
| hsa-miR-4448_R-2_1ss6CG     | GGCTCGTTGGTCTAGGGG      | down | 0.25  | -2.03 | 0.01572049  |
| efu-mir-9277-p5             | TCGTGGCCGAGTGGTTAAG     | down | -inf  | -inf  | 0.016204134 |
| hsa-miR-584-5p_R-1          | TTATGGTTTGCTGGGACTGA    | up   | 1.99  | 0.99  | 0.016323484 |
| hsa-miR-1291_L+1R-2         | GTGGCCCTGACTGAAGACCAGCA | down | 0.10  | -3.34 | 0.016346945 |
| hsa-miR-548j-5p             | AAAAGTAATTGCGGTCTTTGGT  | down | 0.36  | -1.49 | 0.016412353 |
| hsa-miR-361-5p              | TTATCAGAATCTCCAGGGGTAC  | up   | 4.96  | 2.31  | 0.016561934 |
| PC-3p-120076_84             | CAAAGAATTCCCTTGGGCT     | down | 0.08  | -3.62 | 0.016594813 |
| mmu-mir-3968-p3_1ss11AT     | ATCCCACTCCTGACACCAT     | up   | 83.98 | 6.39  | 0.016718618 |
| hsa-miR-4753-5p_L-1R+1      | AAGGCCAAAGGAAGAGAACAGA  | down | -inf  | -inf  | 0.016719616 |
| hsa-miR-100-5p_R-1          | AACCCGTAGATCCGAACCTGT   | down | 0.20  | -2.30 | 0.016722529 |
| PC-3p-164403_58             | AATAATCAGCGGGGAAAGA     | down | 0.08  | -3.65 | 0.016894818 |
| hsa-miR-3680-3p_R-1         | TTTTGCATGACCCTGGGAGTAG  | down | -inf  | -inf  | 0.016980168 |
| mmu-miR-5100_L-1R-1_1ss15TG | CGAATCCCAGCGGGGCCCTC    | down | -inf  | -inf  | 0.017023771 |
| hsa-miR-197-3p              | TTCACCACCTTCTCCACCCAGC  | up   | 3.93  | 1.97  | 0.017043153 |
| PC-5p-55154_230             | GAAGGGCTAGGATTCTAA      | down | -inf  | -inf  | 0.017187726 |
| hsa-miR-4444_L+4R+1         | TGAACTCGAGTTGGAAGAGGCGA | down | -inf  | -inf  | 0.017338091 |
| hsa-miR-1228-3p_R+1         | TCACACCTGCCTCGCCCCCA    | down | -inf  | -inf  | 0.017543936 |
| cja-mir-3135-p3_1ss7GT      | GCGCGATCTCGGCTCACTGCA   | down | -inf  | -inf  | 0.017588124 |
| hsa-mir-599-p5              | TTTGATAAGCTGACATGGGAC   | down | -inf  | -inf  | 0.017755908 |
| hsa-miR-1278_R-2            | TAGTACTGTGCATATCATCT    | down | 0.04  | -4.76 | 0.017794045 |
| hsa-miR-627-5p_1ss2TG       | GGGAGTCTCTAAGAAAAGAGGA  | down | 0.01  | -6.72 | 0.017829004 |
| hsa-miR-3158-3p_R-1         | AAGGGCTTCCTCTCTGCAGGA   | down | 0.26  | -1.94 | 0.018054803 |
| hsa-miR-4683_R-1            | TGGAGATCCAGTGCTCGCCCGA  | down | -inf  | -inf  | 0.018190619 |
| hsa-miR-4286_R+1            | ACCCCACTCCTGGTACCA      | up   | 24.23 | 4.60  | 0.01834938  |
| hsa-miR-574-3p              | CACGCTCATGCACACCCACA    | up   | 4.58  | 2.20  | 0.018664146 |

|                             |                         |      |        |       |             |
|-----------------------------|-------------------------|------|--------|-------|-------------|
| PC-5p-505426_15             | TCCTGGCTGGGTTTATGGAG    | down | -inf   | -inf  | 0.018749855 |
| hsa-miR-219a-1-3p_R+1       | AGAGTTGAGTCTGGACGTCCCGA | down | 0.06   | -4.15 | 0.018806711 |
| PC-5p-517991_14             | GTAGTTTGACTGGGGTGGT     | down | -inf   | -inf  | 0.018863518 |
| hsa-miR-483-3p_L-1R+2       | CACTCCTCTCCTCCCGTCTTCT  | down | 0.08   | -3.64 | 0.01889646  |
| hsa-miR-1908-5p             | CGGCGGGGACGGCGATTGGTC   | up   | 3.13   | 1.65  | 0.018925133 |
| hsa-miR-3960_L-2_1ss12AC    | CGGCGGCGGCGGCGGGGG      | down | 0.44   | -1.18 | 0.018953894 |
| hsa-let-7g-3p               | CTGTACAGGCCACTGCCTTGC   | down | 0.12   | -3.07 | 0.018984429 |
| mmu-mir-6236-p5_1ss11CG     | CCTGCCGAATGAACTAGCCCT   | up   | 21.61  | 4.43  | 0.019074181 |
| hsa-miR-154-5p              | TAGGTTATCCGTGTTGCCTTCG  | down | -inf   | -inf  | 0.019105205 |
| hsa-miR-3179_L+1R-1         | TAGAAGGGGTGAAATTTAAACG  | down | -inf   | -inf  | 0.019399212 |
| hsa-miR-6793-5p_L+2R-3      | ACTGTGGGTTCTGGGTTGGGG   | down | -inf   | -inf  | 0.01942121  |
| hsa-miR-548am-3p_R-2        | CAAAAACACTGCAGTTACTTTT  | down | 0.03   | -5.16 | 0.019482918 |
| PC-5p-514458_14             | AGCTGAAGTGTAAGAGGTTGA   | down | -inf   | -inf  | 0.019635008 |
| hsa-miR-671-3p              | TCCGTTCTCAGGGCTCCACC    | up   | 17.88  | 4.16  | 0.020019226 |
| hsa-mir-548aw-p3_1ss22TC    | AAAACCGCGATGACTTTTGCAC  | down | -inf   | -inf  | 0.021011928 |
| bta-miR-2478_L-1_1ss2TA     | AATCCCCTTCTGACACCA      | up   | 22.55  | 4.50  | 0.021067609 |
| ssc-mir-1285-p5_1ss22TC     | CGCGCCTGTGAATAGCCACTGCA | up   | 4.13   | 2.05  | 0.021786372 |
| ocu-miR-194-3p_R-2          | CCAGTGGAGATGCTGTTACT    | down | -inf   | -inf  | 0.021922135 |
| mmu-mir-6236-p3_1ss14CG     | TCACCTGCCGAATGAACT      | up   | 32.50  | 5.02  | 0.022218713 |
| hsa-miR-378i_R+1_1ss9AT     | ACTGGACTTGGAGTCAGAAGGT  | down | 0.07   | -3.90 | 0.022229132 |
| pal-miR-339b-5p_R+1         | TCCCTGTCCTCCAGGAGCTT    | down | 0.13   | -2.91 | 0.022637841 |
| pal-miR-9993b-3p_L+1_1ss2AT | TTTCTCGCTGGGGCCTCCA     | down | -inf   | -inf  | 0.022818569 |
| mmu-miR-3968_L-2_1ss14AT    | AATCCCCTCCTGACACCA      | up   | 179.14 | 7.48  | 0.022955832 |
| PC-3p-170351_55             | GTGGGAGGCTTTGAAACC      | down | -inf   | -inf  | 0.022960298 |
| PC-3p-8405_1605             | TAGTTGTTGGGGATTACT      | up   | 18.24  | 4.19  | 0.022981024 |
| hsa-miR-1304-3p_1ss13CA     | TCTCACTGTAGCATCGAACCCC  | up   | 3.68   | 1.88  | 0.023445285 |



|                               |                            |      |        |       |             |
|-------------------------------|----------------------------|------|--------|-------|-------------|
| hsa-miR-29b-1-5p_R-4          | GCTGGTTTCATATGGTGGTT       | down | -inf   | -inf  | 0.023457583 |
| mmu-miR-6239_R-2_1ss6TG       | TAGCGGTGGATCACTCGG         | down | -inf   | -inf  | 0.023590013 |
| hsa-miR-342-3p_R+1            | TCTCACACAGAAATCGCACCCGTC   | up   | 2.56   | 1.35  | 0.023660474 |
| PC-5p-370386_26               | ATTGATGGCATCGAACCAGG       | down | -inf   | -inf  | 0.023818849 |
| hsa-miR-548ab_L+1R-3          | CAAAAGTAATTGTGGATTTT       | down | 0.22   | -2.19 | 0.02430114  |
| hsa-miR-2278_L-1R+1           | AGAGCAGTGTGTGTTGCCTGGG     | down | -inf   | -inf  | 0.024461221 |
| hsa-miR-509-3-5p              | TACTGCAGACGTGGCAATCATG     | down | -inf   | -inf  | 0.02455571  |
| PC-5p-153646_63               | GCCATCGGGGCGAGTGCG         | down | -inf   | -inf  | 0.024931778 |
| hsa-miR-3139_R-1              | TAGGAGCTCAACAGATGCCTGT     | down | -inf   | -inf  | 0.02509119  |
| hsa-miR-512-3p_R-2            | AAGTGCTGTCATAGCTGAGG       | down | -inf   | -inf  | 0.025145688 |
| hsa-miR-511-3p_R+2            | AATGTGTAGCAAAAGACAGAAT     | down | -inf   | -inf  | 0.02518683  |
| hsa-miR-18b-3p_L+3R-5         | TACTGCCCTAAATGCCCTT        | down | 0.18   | -2.49 | 0.025199508 |
| hsa-miR-5090_L+1R-4           | CCCGGGGCAGATTGGTGTAG       | down | -inf   | -inf  | 0.025314798 |
| hsa-miR-548d-3p               | CAAAAACCACAGTTTCTTTTGC     | down | -inf   | -inf  | 0.025470246 |
| mmu-miR-3535                  | TGGATATGATGACTGATTACCTGAGA | down | 0.26   | -1.93 | 0.025600473 |
| PC-3p-1495_12859              | CGAGTCCCATCAGCCACCCCA      | up   | 13.95  | 3.80  | 0.025714033 |
| mmu-miR-3968_L-3_1ss14AT      | ATCCCCTCCTGACACCA          | up   | 133.70 | 7.06  | 0.025946135 |
| PC-5p-299757_33               | CACACTGACACAGAGAGAGAGA     | down | -inf   | -inf  | 0.026031909 |
| hsa-miR-4804-5p_L+1R-1_1ss7CG | TTTGAGGGTAAGGTTAAGCA       | down | 0.05   | -4.33 | 0.026047222 |
| PC-3p-1467_13126              | ATCCCTCCGTCTCCGCCA         | up   | 57.57  | 5.85  | 0.026393727 |
| hsa-miR-26a-2-3p              | CCTATTCTTGATTACTTGTTC      | down | 0.26   | -1.92 | 0.02645758  |
| hsa-miR-339-5p                | TCCCTGTCCCTCCAGGAGCTCACG   | up   | 2.16   | 1.11  | 0.026522456 |
| hsa-miR-4635_R-1              | TCTTGAAGTCAGAACCCGCA       | down | -inf   | -inf  | 0.026733744 |
| PC-5p-311599_32               | ACTGCTGCAGATGGAAAAGTTC     | down | -inf   | -inf  | 0.027657208 |
| PC-5p-310574_32               | TTTGAGAGAACTTCGCCCTTGT     | down | -inf   | -inf  | 0.027784086 |
| hsa-miR-199a-3p               | ACAGTAGTCTGCACATTGGTTA     | down | 0.63   | -0.67 | 0.02783789  |

|                       |                          |      |        |       |             |
|-----------------------|--------------------------|------|--------|-------|-------------|
| hsa-miR-3198          | GTGGAGTCCTGGGGAATGGAGA   | down | 0.11   | -3.16 | 0.027998666 |
| PC-3p-47036_282       | GGATGTTGGCTTAGAAGC       | up   | 15.77  | 3.98  | 0.028146088 |
| hsa-mir-548p-p3       | CAAAAAGTGCAGTTACTTTTGC   | down | 0.23   | -2.10 | 0.028242716 |
| hsa-miR-548ah-3p      | CAAAAAGTGCAGTTACTTTTGC   | down | 0.23   | -2.10 | 0.028242716 |
| hsa-miR-4661-5p_R-1   | AACTAGCTCTGTGGATCCTGA    | down | -inf   | -inf  | 0.028406731 |
| hsa-miR-5009-5p_L-1   | TGGACTTTTTTCAGATTTGGGGAT | down | -inf   | -inf  | 0.028472485 |
| hsa-miR-4747-5p_R-3   | AGGGAAGGAGGCTTGGTCT      | down | 0.21   | -2.27 | 0.02856317  |
| hsa-miR-889-3p        | TTAATATCGGACAACCATTTGT   | up   | 4.25   | 2.09  | 0.028739468 |
| PC-3p-5835_2265       | GTAGGTAATCTTCAGGCT       | up   | 77.49  | 6.28  | 0.02909039  |
| PC-5p-6976_1912       | AGAGCGTTCTGTAAGCCT       | up   | 9.02   | 3.17  | 0.029121916 |
| PC-3p-52541_245       | ATCAAAGTCTTGGCACCA       | up   | 94.93  | 6.57  | 0.029619934 |
| hsa-miR-1276          | TAAAGAGCCCTGTGGAGACA     | down | 0.13   | -2.92 | 0.029755677 |
| PC-3p-6927_1922       | GAGGTTGGCTTAGAAGCAGC     | up   | 13.57  | 3.76  | 0.029828702 |
| hsa-miR-375-3p        | TTTGTTTCGTTTCGGCTCGCGTGA | down | 0.20   | -2.35 | 0.029850579 |
| hsa-mir-6820-p5       | TCTGCGGCAGAGCTGGGGT      | down | -inf   | -inf  | 0.030221053 |
| hsa-miR-186-3p_L-2R+1 | CCAAAGGTGAATTTTTTGGGA    | down | -inf   | -inf  | 0.030405299 |
| PC-3p-101409_103      | AAACAGGATAGGCACTAAATGG   | down | 0.27   | -1.86 | 0.030512679 |
| hsa-miR-454-3p        | TAGTGCAATATTGCTTATAGGGT  | down | 0.04   | -4.58 | 0.030521751 |
| PC-5p-180544_52       | TAACTCTTAGAATCCCCAAAG    | down | 0.03   | -4.85 | 0.031010368 |
| hsa-miR-4669_R-1      | TGTGTCCGGGAAGTGGAGGAG    | down | 0.10   | -3.35 | 0.031085397 |
| hsa-miR-23b-3p_R+1    | ATCACATTGCCAGGGATTACCACT | up   | 1.62   | 0.70  | 0.031358138 |
| hsa-miR-590-5p        | GAGCTTATTCATAAAAGTGCAG   | down | -inf   | -inf  | 0.031361877 |
| PC-5p-61866_198       | AGTCCGGCCTCACTACCA       | up   | 223.87 | 7.81  | 0.031721984 |
| PC-3p-4291_3123       | ATCCCGTCTGCCTCACCA       | up   | 203.47 | 7.67  | 0.031725451 |
| hsa-miR-7854-3p       | TGAGGTGACCGCAGATGGGAA    | down | 0.28   | -1.85 | 0.032029597 |
| hsa-miR-4676-3p_L-1   | ACTGTTTCACCACTGGCTCTT    | down | 0.29   | -1.78 | 0.032466957 |

|                             |                           |      |        |       |             |
|-----------------------------|---------------------------|------|--------|-------|-------------|
| bta-miR-11987_L-1R-1_1ss8TA | GAGGAAACTCTGGTGGAGG       | down | 0.29   | -1.78 | 0.032620049 |
| hsa-miR-1910-3p             | GAGGCAGAAGCAGGATGACA      | down | -inf   | -inf  | 0.032670608 |
| bta-miR-378_L-1R+1          | CTGGACTTGGAGTCAGAAGGCT    | down | 0.24   | -2.04 | 0.032834515 |
| hsa-mir-4485-p3_1ss1CT      | TGTTAACGGCCGCGGTAC        | up   | 7.88   | 2.98  | 0.033006497 |
| chi-miR-16b-5p              | TAGCAGCACGTAAATATTGGGG    | down | -inf   | -inf  | 0.033070927 |
| PC-3p-48697_270             | ATCCCCTCTGCCTCCACCA       | up   | 243.65 | 7.93  | 0.033746373 |
| hsa-miR-3614-5p_R-1         | CCACTTGGATCTGAAGGCTGCC    | down | 0.15   | -2.76 | 0.033959312 |
| hsa-miR-191-3p_L-1          | CTGCGCTTGGATTTTCGTCCCC    | up   | 4.84   | 2.27  | 0.034273271 |
| hsa-miR-133a-3p_R+1         | TTTGGTCCCCTTCAACCAGCTGT   | up   | 4.62   | 2.21  | 0.034393006 |
| hsa-miR-5003-3p             | TACTTTTCTAGGTTGTTGGGG     | down | -inf   | -inf  | 0.034406533 |
| hsa-miR-548ap-5p_L+1        | CAAAAGTAATTGCGGTCTTT      | down | -inf   | -inf  | 0.03494639  |
| PC-5p-9698_1413             | GCAGGAAAAGAAATCAACC       | up   | 15.70  | 3.97  | 0.035326994 |
| hsa-miR-221-5p_R+2          | ACCTGGCATAACAATGTAGATTTCT | up   | 2.79   | 1.48  | 0.035340126 |
| PC-5p-17547_833             | CCCACCAGGAGCCTGGCACTGT    | up   | 20.95  | 4.39  | 0.035404353 |
| mmu-miR-5100_R-1_1ss15TG    | TCGAATCCCAGCGGGGCCCTC     | down | -inf   | -inf  | 0.036310696 |
| hsa-miR-4446-3p             | CAGGGCTGGCAGTGACATGGGT    | up   | 6.29   | 2.65  | 0.03635323  |
| efu-miR-9226_L-1R-1         | CAAGTCCCTGTTCCGGGCGCC     | down | -inf   | -inf  | 0.03665765  |
| hsa-mir-7851-p5_1ss12AT     | AGTAGCTGGGATTACAGG        | down | -inf   | -inf  | 0.036712453 |
| PC-3p-262158_37             | TATCATCTTGGGCGTGGTTGA     | down | -inf   | -inf  | 0.036879614 |
| rno-miR-3590-3p_R+1         | TAGCACAATGTGAAAAGAGCTCT   | down | -inf   | -inf  | 0.037148113 |
| hsa-miR-6779-5p_L+1R-1      | TCTGGGAGGGGCTGGGTTTGG     | down | -inf   | -inf  | 0.037690838 |
| hsa-miR-4727-3p             | ATAGTGGAAGCTGGCAGATTC     | down | -inf   | -inf  | 0.037896358 |
| PC-3p-27930_522             | AGACTCTTCTCCCGCTCCA       | up   | 49.02  | 5.62  | 0.037973702 |
| PC-5p-224026_43             | GTTGGAGGTTGGAGTTGA        | down | -inf   | -inf  | 0.038166369 |
| hsa-mir-4473-p5             | CACTTGTAATGGAGAACACT      | down | 0.11   | -3.24 | 0.038314456 |
| hsa-miR-139-3p              | TGGAGACGCGGCCCTGTTGGAGT   | up   | 2.33   | 1.22  | 0.03858276  |

|                             |                          |      |        |       |             |
|-----------------------------|--------------------------|------|--------|-------|-------------|
| mdo-miR-200a-3p_R+2         | TAACACTGTCTGGTAACGATGTTT | down | -inf   | -inf  | 0.038845112 |
| hsa-miR-4504                | TGTGACAATAGAGATGAACATG   | down | 0.20   | -2.34 | 0.038905676 |
| hsa-miR-135a-3p_L+1R-1      | ATATAGGGATTGGAGCCGTGGC   | down | -inf   | -inf  | 0.038953639 |
| PC-3p-392001_24             | TGCAGAGGGACTGGCAGGAAG    | down | -inf   | -inf  | 0.039134929 |
| hsa-miR-374b-5p_R-1         | ATATAATACAACCTGCTAAGT    | up   | 7.22   | 2.85  | 0.039255217 |
| PC-5p-494846_15             | ATCTGAAATCTGATGAGAAAT    | down | -inf   | -inf  | 0.039309258 |
| PC-3p-656119_10             | TCACCGCCCTTCCCGCCCGCG    | down | -inf   | -inf  | 0.039900881 |
| PC-5p-73747_156             | GCCGCGGCGGCCGTGGGTGT     | down | 0.38   | -1.39 | 0.039999446 |
| PC-3p-367049_26             | ATATAGATATCATCAGAGCTGT   | down | -inf   | -inf  | 0.040269803 |
| hsa-miR-7705_R-1            | AATAGCTCAGAATGTCAGTTCT   | down | -inf   | -inf  | 0.040285581 |
| PC-5p-80013_140             | TAGGGAAAATGTACAGAAATGG   | down | -inf   | -inf  | 0.040877921 |
| hsa-mir-3143-p3             | CAACTCTTTACAATGTTTCT     | down | -inf   | -inf  | 0.041148095 |
| hsa-miR-561-5p              | ATCAAGGATCTTAACTTTGCC    | down | 0.08   | -3.61 | 0.041179238 |
| PC-5p-335457_29             | GTCGGCGGGGGCCCCGGGA      | down | -inf   | -inf  | 0.041617844 |
| hsa-mir-497-p3_1ss5CA       | AGAGAGAGGGTGGGGGAG       | down | -inf   | -inf  | 0.041764909 |
| hsa-miR-1179_R+1            | AAGCATTCTTTCATTGGTTGGT   | down | -inf   | -inf  | 0.041870402 |
| hsa-miR-4686_R-4            | TATCTGCTGGGCTTTCTGG      | down | -inf   | -inf  | 0.041920978 |
| ptr-miR-6131_R-1_1ss15GT    | GGCTGGTCGGATGGTAGT       | down | -inf   | -inf  | 0.042012476 |
| mmu-miR-8112_L+1R-1         | CTCTCCGCCACCTCCACCGC     | down | -inf   | -inf  | 0.042012743 |
| PC-3p-85981_127             | AAGGTCAGCTCAATGAGAA      | up   | 17.89  | 4.16  | 0.042173359 |
| mmu-miR-3968_L-2R-1_1ss14AT | AATCCCACTCCTGACACC       | up   | 108.58 | 6.76  | 0.0422171   |
| hsa-miR-6730-5p_L-2         | AAAGGTGGAGGGGTTGTCAGA    | down | -inf   | -inf  | 0.042356541 |
| hsa-miR-6858-5p_L-1         | TGAGGAGGGGCTGGCAGGGAC    | down | -inf   | -inf  | 0.042490007 |
| PC-5p-358054_27             | TTGGAGAACTCTCCTTCCCGG    | down | -inf   | -inf  | 0.04280781  |
| hsa-miR-6131_R-1_1ss15GT    | GGCTGGTCAGATGGTAGT       | down | -inf   | -inf  | 0.042850394 |
| hsa-mir-12136-p3_1ss20TC    | TCGATTCCTTCCTTTTTTGCC    | up   | 12.54  | 3.65  | 0.043024236 |

|                          |                         |      |        |       |             |
|--------------------------|-------------------------|------|--------|-------|-------------|
| hsa-miR-642b-3p_R-3      | AGACACATTTGGAGAGGGA     | down | -inf   | -inf  | 0.043522428 |
| hsa-miR-4659b-5p_R+3     | TTGCCATGTCTAAGAAGAAAAT  | down | -inf   | -inf  | 0.043665226 |
| hsa-miR-144-5p           | GGATATCATCATATACTGTAAG  | down | 0.03   | -5.02 | 0.043761351 |
| PC-3p-10362_1335         | CAGCCCGAAGTGTGACCCA     | up   | 172.34 | 7.43  | 0.043816448 |
| mmu-mir-6236-p5_1ss4CG_1 | AATGAACTAGCCCTGAAA      | up   | 32.75  | 5.03  | 0.044025653 |
| mmu-mir-6236-p5_1ss4CG_3 | AATGAACTAGCCCTGAAAATGG  | up   | 32.75  | 5.03  | 0.044025653 |
| mmu-mir-6236-p5_1ss4CG_2 | AATGAACTAGCCCTGAAAA     | up   | 32.75  | 5.03  | 0.044025653 |
| hsa-miR-99b-5p           | CACCCGTAGAACCGACCTTGCG  | up   | 5.28   | 2.40  | 0.044089942 |
| hsa-miR-6803-3p_R-1      | TCCCTCGCCTTCTCACCCCTCA  | down | 0.05   | -4.32 | 0.044112311 |
| hsa-miR-138-5p           | AGCTGGTGTGTGAATCAGGCCG  | down | -inf   | -inf  | 0.04412647  |
| PC-3p-154505_62          | CTTGACTGGAGGATTCGT      | down | -inf   | -inf  | 0.044153261 |
| hsa-miR-628-3p           | TCTAGTAAGAGTGGCAGTCGA   | up   | 1.58   | 0.66  | 0.044155683 |
| cfa-mir-8903-p3_1ss9AG   | TCTGGGGTGGGGCCTGGGAAT   | down | -inf   | -inf  | 0.044416104 |
| hsa-miR-3158-5p_R-1      | CCTGCAGAGAGGAAGCCCTT    | down | -inf   | -inf  | 0.044551092 |
| PC-5p-310347_32          | TGCAAAAATAATTGTGGTTTTGA | down | -inf   | -inf  | 0.044621886 |
| PC-5p-579051_12          | AGTGAAGCTGGCCTAAATGTT   | down | -inf   | -inf  | 0.04484443  |
| hsa-miR-4454_L-2         | ATCCGAGTCACGGCACCA      | up   | 13.34  | 3.74  | 0.044847902 |
| hsa-miR-140-5p           | CAGTGGTTTTACCCTATGGTAG  | down | 0.47   | -1.09 | 0.04495751  |
| hsa-miR-3928-3p          | GGAGGAACCTTGGAGCTTCGGC  | up   | 3.60   | 1.85  | 0.045291905 |
| PC-3p-855779_7           | CCTCACTCCTGCCACACCCCTC  | down | -inf   | -inf  | 0.045609671 |
| hsa-miR-3160-3p_R-2      | AGAGCTGAGACTAGAAAAGCC   | down | -inf   | -inf  | 0.045680709 |
| mmu-miR-106a-5p          | CAAAGTGCTAACAGTGCAGGTAG | down | -inf   | -inf  | 0.045709257 |
| hsa-miR-7851-3p_R+1      | TACCTGGGAGACTGAGGTTGGAT | down | -inf   | -inf  | 0.046248244 |
| PC-5p-318577_31          | TTTGTCTGGGGCCTGGTGAGT   | down | -inf   | -inf  | 0.046621829 |
| hsa-miR-502-5p_L+1R-1    | AATCCTTGCTATCTGGGTGCT   | down | -inf   | -inf  | 0.046767438 |
| hsa-miR-6787-5p_1ss22CT  | TGGCGGGGGTAGAGCTGGCTGT  | down | -inf   | -inf  | 0.046981061 |

|                            |                          |      |       |       |             |
|----------------------------|--------------------------|------|-------|-------|-------------|
| hsa-mir-548ak-p3_1ss12TG   | AAAACCGCAATGACTTTTG      | down | -inf  | -inf  | 0.046983043 |
| hsa-miR-331-3p_L-1R+1      | CCCCTGGGCCTATCCTAGAAT    | up   | 5.92  | 2.57  | 0.047240549 |
| hsa-miR-378d_R-2           | ACTGGACTTGGAGTCAGA       | down | 0.03  | -5.06 | 0.04781347  |
| hsa-miR-103a-1-5p_R+1      | GGCTTCTTTACAGTGCTGCCTTGT | down | -inf  | -inf  | 0.047833282 |
| hsa-miR-4690-3p_R-1        | GCAGCCCAGCTGAGGCCTCT     | down | 0.07  | -3.74 | 0.047938744 |
| hsa-miR-92b-3p             | TATTGCACTCGTCCCGGCCTCC   | up   | 2.10  | 1.07  | 0.048120631 |
| hsa-miR-323b-3p_R-1        | CCCAATACACGGTCGACCTCT    | up   | 2.57  | 1.36  | 0.048200354 |
| hsa-miR-5188_L-1R+1        | ATCGGACCCATTTAAACCGGAGA  | down | -inf  | -inf  | 0.048343481 |
| PC-5p-127875_78            | TGGCAAAGGAGGTGAGAGTG     | down | -inf  | -inf  | 0.048711104 |
| hsa-miR-548s_R-1           | ATGGCCAAAACCTGCAGTTATTT  | down | 0.16  | -2.63 | 0.048781578 |
| eca-mir-1543-p5_1ss21GA    | TTTGACCTCTGAGAGTGGAAT    | down | 0.11  | -3.13 | 0.048911956 |
| eca-mir-1543-p3_1ss21GA    | TTTGACCTCTGAGAGTGGAAT    | down | 0.11  | -3.13 | 0.048911956 |
| hsa-miR-4700-5p            | TCTGGGGATGAGGACAGTGTGT   | down | -inf  | -inf  | 0.048989049 |
| mmu-miR-30f_L+1R-1_1ss17AG | TGTAAACATCCGACTGGAAGCT   | down | 0.04  | -4.61 | 0.04922045  |
| cja-miR-151_R+2            | TCGAGGAGCTCACAGTCTAGTT   | up   | 6.93  | 2.79  | 0.049547736 |
| hsa-miR-372-3p_R-1         | AAAGTGCTGCGACATTTGAGCG   | down | -inf  | -inf  | 0.049552237 |
| PC-3p-836782_7             | CAGCCTCTGCAGTCCCCGG      | down | -inf  | -inf  | 0.049865151 |
| PC-5p-23414_626            | AAAGTAGGTCATGTCAGACT     | up   | 28.91 | 4.85  | 0.049923367 |
| PC-3p-11702_1197           | AAAGTGGACGTATAGGGT       | up   | 7.03  | 2.81  | 0.049931679 |

**Supplementary Table 2. Differentially expressed miRNAs between smoking IA and non-smoking IA group.**

| miR name               | miR sequence             | up/down | fold_change | log2(fold_change) | P value  |
|------------------------|--------------------------|---------|-------------|-------------------|----------|
| hsa-miR-378a-3p        | ACTGGACTTGGAGTCAGAAGGC   | down    | 0.27        | -1.87             | 1.16E-05 |
| hsa-miR-574-5p         | TGAGTGTGTGTGTGTGAGTGTGT  | down    | 0.18        | -2.45             | 2.33E-05 |
| hsa-miR-28-3p          | CACTAGATTGTGAGCTCCTGGA   | down    | 0.51        | -0.97             | 3.85E-05 |
| hsa-miR-361-3p_R+1     | TCCCCCAGGTGTGATTCTGATTTG | down    | 0.20        | -2.34             | 3.96E-05 |
| hsa-miR-340-5p         | TTATAAAGCAATGAGACTGATT   | down    | 0.19        | -2.40             | 4.08E-05 |
| hsa-miR-374a-3p        | CTTATCAGATTGTATTGTAATT   | down    | 0.12        | -3.06             | 4.95E-05 |
| hsa-miR-130b-3p        | CAGTGCAATGATGAAAGGGCAT   | down    | 0.19        | -2.39             | 7.26E-05 |
| hsa-miR-223-3p_R+1     | TGTCAGTTTGTCAAATACCCCAA  | down    | 0.28        | -1.81             | 7.99E-05 |
| hsa-miR-1250-5p        | ACGGTGCTGGATGTGGCCTTT    | down    | 0.03        | -5.10             | 8.46E-05 |
| hsa-miR-199a-3p        | ACAGTAGTCTGCACATTGGTTA   | down    | 0.16        | -2.60             | 8.77E-05 |
| hsa-miR-185-5p         | TGGAGAGAAAGGCAGTTCCTGA   | down    | 0.22        | -2.17             | 8.80E-05 |
| hsa-miR-128-3p         | TCACAGTGAACCGGTCTCTTT    | down    | 0.24        | -2.06             | 8.91E-05 |
| hsa-miR-629-5p         | TGGGTTTACGTTGGGAGAACT    | down    | 0.31        | -1.69             | 1.01E-04 |
| hsa-miR-152-3p         | TCAGTGCATGACAGAACTTGG    | down    | 0.18        | -2.46             | 1.04E-04 |
| hsa-miR-151a-3p        | CTAGACTGAAGCTCCTTGAGG    | down    | 0.55        | -0.85             | 1.15E-04 |
| hsa-miR-142-3p_R-1     | TGTAGTGTTCCTACTTTATGG    | down    | 0.07        | -3.94             | 1.15E-04 |
| hsa-miR-20b-5p         | CAAAGTGCTCATAGTGCAGGTAG  | down    | 0.09        | -3.50             | 1.27E-04 |
| hsa-miR-126-3p_R-1     | TCGTACCGTGAGTAATAATGC    | down    | 0.22        | -2.16             | 1.29E-04 |
| hsa-miR-28-5p_R-1      | AAGGAGCTCACAGTCTATTGA    | down    | 0.08        | -3.62             | 1.44E-04 |
| hsa-miR-103a-3p        | AGCAGCATTGTACAGGGCTATGA  | down    | 0.10        | -3.38             | 1.81E-04 |
| PC-3p-23817_616        | TTGCTGGGAAAGGGAGAAGTTC   | down    | 0.09        | -3.54             | 1.87E-04 |
| hsa-miR-22-5p_R-1      | AGTTCTTCAGTGGCAAGCTTT    | down    | 0.11        | -3.19             | 1.88E-04 |
| hsa-miR-93-5p          | CAAAGTGCTGTTCGTGCAGGTAG  | down    | 0.11        | -3.19             | 2.26E-04 |
| hsa-miR-30e-3p_1ss22CT | CTTTCAGTCGGATGTTTACAGT   | down    | 0.36        | -1.46             | 2.27E-04 |

|                          |                          |      |      |       |          |
|--------------------------|--------------------------|------|------|-------|----------|
| hsa-miR-140-5p           | CAGTGGTTTTACCCTATGGTAG   | down | 0.11 | -3.23 | 2.38E-04 |
| hsa-miR-17-5p            | CAAAGTGCTTACAGTGCAGGTAG  | down | 0.05 | -4.33 | 2.51E-04 |
| hsa-miR-106a-5p_1ss1AC   | CAAAGTGCTTACAGTGCAGGTAG  | down | 0.05 | -4.33 | 2.51E-04 |
| hsa-miR-101-3p_R+1       | TACAGTACTGTGATAACTGAAG   | down | 0.15 | -2.76 | 2.62E-04 |
| hsa-miR-221-3p           | AGCTACATTGTCTGCTGGGTTTC  | down | 0.20 | -2.29 | 2.66E-04 |
| hsa-miR-20a-5p           | TAAAGTGCTTATAGTGCAGGTAG  | down | 0.04 | -4.51 | 2.78E-04 |
| hsa-miR-21-5p            | TAGCTTATCAGACTGATGTTGA   | down | 0.09 | -3.54 | 3.22E-04 |
| PC-3p-10623_1306         | CAGTTCAATGGTGTTCAGCAGA   | down | 0.03 | -5.25 | 3.39E-04 |
| hsa-miR-1307-3p_R+1      | ACTCGGCGTGGCGTCCGGTCGTGG | down | 0.32 | -1.65 | 3.49E-04 |
| mmr-miR-1839_L+1R-1      | AAGGTAGATAGAACAGGTCTTG   | down | 0.28 | -1.81 | 3.56E-04 |
| hsa-miR-363-5p           | CGGGTGGATCACGATGCAATTT   | down | 0.08 | -3.60 | 4.08E-04 |
| mml-miR-378d_R-1_1ss21CT | ACTGGACTTGGAGTCAGAAGT    | down | 0.02 | -5.52 | 4.13E-04 |
| hsa-miR-548j-5p          | AAAAGTAATTGCGGTCTTTGGT   | down | 0.09 | -3.42 | 4.51E-04 |
| hsa-miR-7851-3p_R+1      | TACCTGGGAGACTGAGGTTGGAT  | down | -inf | -inf  | 4.54E-04 |
| hsa-miR-652-3p_R+1       | AATGGCGCCACTAGGGTTGTGT   | down | 0.49 | -1.03 | 4.69E-04 |
| hsa-miR-132-5p           | ACCGTGGCTTTCGATTGTTACT   | down | 0.08 | -3.67 | 4.70E-04 |
| hsa-miR-301b-3p          | CAGTGCAATGATATTGTCAAAGC  | down | 0.03 | -4.95 | 4.86E-04 |
| hsa-miR-26b-5p_R+1       | TTCAAGTAATTCAGGATAGGTT   | down | 0.25 | -2.00 | 4.89E-04 |
| PC-5p-35367_398          | ACAGGATGCAGTGCTCAGTGA    | down | 0.03 | -4.89 | 5.16E-04 |
| hsa-miR-548n             | CAAAAGTAATTGTGGATTTTGT   | down | 0.10 | -3.26 | 5.18E-04 |
| hsa-miR-548ag_1ss4GA     | AAAAGTAATTGTGGTTTCTGC    | down | 0.05 | -4.44 | 5.30E-04 |
| hsa-miR-148b-3p          | TCAGTGCATCACAGAACTTTGT   | down | 0.33 | -1.59 | 5.36E-04 |
| hsa-miR-107_R-2          | AGCAGCATTGTACAGGGCTAT    | down | 0.42 | -1.26 | 5.45E-04 |
| hsa-miR-181b-5p_R-2      | AACATTCAATTGCTGTCCGGTGG  | down | 0.22 | -2.16 | 5.61E-04 |
| bta-miR-378_R+1_1ss22CA  | ACTGGACTTGGAGTCAGAAGGAT  | down | 0.01 | -7.59 | 5.70E-04 |
| hsa-mir-597-p3           | AGTGGTTCTCTTGTGGCTCA     | down | -inf | -inf  | 5.87E-04 |



|                        |                          |      |      |       |          |
|------------------------|--------------------------|------|------|-------|----------|
| hsa-miR-548bc          | AAAAACTGTGATTACTTTTGC    | down | 0.11 | -3.23 | 6.59E-04 |
| hsa-miR-181d-5p_R+1    | AACATTCATTGTTGTCGGTGGGTT | down | 0.23 | -2.10 | 6.84E-04 |
| hsa-miR-1273h-5p_R+2   | CTGGGAGGTCAAGGCTGCAGTGT  | down | 0.15 | -2.71 | 7.32E-04 |
| cja-miR-151_R+1        | TCGAGGAGCTCACAGTCTAGC    | down | 0.11 | -3.24 | 7.78E-04 |
| hsa-miR-15a-5p_R-1     | TAGCAGCACATAATGGTTTGT    | down | 0.28 | -1.86 | 8.17E-04 |
| hsa-miR-598-3p         | TACGTCATCGTTGTCATCGTCA   | down | 0.14 | -2.81 | 8.47E-04 |
| hsa-miR-628-5p         | ATGCTGACATATTTACTAGAGG   | down | 0.06 | -4.15 | 8.48E-04 |
| hsa-miR-33a-5p_R-1     | GTGCATTGTAGTTGCATTGC     | down | 0.00 | -8.45 | 8.55E-04 |
| hsa-miR-2355-3p_L-2R+2 | TGTCCTTGCTGTTTGGAGATAA   | down | 0.17 | -2.52 | 8.76E-04 |
| bta-miR-199c_L-1R+4    | ACAGTAGTCTGCACATTGGTTTC  | down | -inf | -inf  | 9.17E-04 |
| hsa-miR-2277-3p_R+1    | TGACAGCGCCCTGCCTGGCTCG   | down | 0.07 | -3.78 | 9.75E-04 |
| hsa-miR-29b-2-5p_R+1   | CTGGTTTCACATGGTGGCTTAGA  | down | 0.14 | -2.83 | 9.89E-04 |
| hsa-miR-1287-5p        | TGCTGGATCAGTGGTTCGAGTC   | down | 0.30 | -1.75 | 1.01E-03 |
| hsa-miR-3064-5p        | TCTGGCTGTTGTGGTGTGCAA    | down | 0.06 | -4.06 | 1.03E-03 |
| hsa-miR-501-5p_R+2     | AATCCTTTGTCCCTGGGTGAGAGT | down | 0.04 | -4.49 | 1.04E-03 |
| hsa-miR-219a-1-3p_R+1  | AGAGTTGAGTCTGGACGTCCCGA  | down | 0.06 | -3.99 | 1.04E-03 |
| hsa-miR-3124-5p        | TTCGCGGGCGAAGGCAAAGTC    | down | 0.07 | -3.89 | 1.05E-03 |
| hsa-miR-18a-5p         | TAAGGTGCATCTAGTGCAGATAG  | down | 0.10 | -3.33 | 1.07E-03 |
| mdo-miR-200a-3p_R+2    | TAACACTGTCTGGTAACGATGTTT | down | -inf | -inf  | 1.12E-03 |
| hsa-miR-378c_R-5       | ACTGGACTTGGAGTCAGAAG     | down | 0.16 | -2.61 | 1.15E-03 |
| hsa-miR-3120-3p        | CACAGCAAGTGTAGACAGGCA    | down | 0.26 | -1.96 | 1.15E-03 |
| hsa-miR-6513-5p        | TTTGGGATTGACGCCACATGTCT  | down | 0.11 | -3.22 | 1.16E-03 |
| hsa-miR-32-3p_R-1      | CAATTTAGTGTGTGTGATATT    | down | 0.05 | -4.19 | 1.24E-03 |
| hsa-miR-338-3p_R+1     | TCCAGCATCAGTGATTTTGTGA   | down | 0.15 | -2.71 | 1.25E-03 |
| PC-3p-83127_133        | CCAGGCTCTTGGTTATGTTTT    | down | 0.06 | -4.10 | 1.25E-03 |
| hsa-miR-140-3p_R+1     | TACCACAGGGTAGAACCACGGA   | down | 0.61 | -0.72 | 1.31E-03 |

|                        |                            |      |      |       |          |
|------------------------|----------------------------|------|------|-------|----------|
| PC-5p-14422_992        | ACTTGACTGCTCTGACCA         | down | 0.03 | -5.03 | 1.32E-03 |
| hsa-mir-4422-p3        | GCCCTTCTTGATGCTCTTGATT     | down | -inf | -inf  | 1.32E-03 |
| hsa-miR-106b-5p_R-1    | TAAAGTGCTGACAGTGCAGA       | down | 0.14 | -2.88 | 1.32E-03 |
| hsa-miR-580-3p         | TTGAGAATGATGAATCATTAGG     | down | -inf | -inf  | 1.36E-03 |
| hsa-miR-497-5p         | CAGCAGCACACTGTGGTTTGT      | down | 0.04 | -4.48 | 1.40E-03 |
| hsa-miR-6876-5p        | CAGGAAGGAGACAGGCAGTTCA     | down | 0.10 | -3.29 | 1.41E-03 |
| hsa-miR-22-3p          | AAGCTGCCAGTTGAAGAACTGT     | down | 0.48 | -1.07 | 1.42E-03 |
| hsa-miR-454-3p         | TAGTGCAATATTGCTTATAGGGT    | down | 0.02 | -5.49 | 1.42E-03 |
| PC-5p-80013_140        | TAGGGAAAATGTACAGAAATGG     | down | -inf | -inf  | 1.44E-03 |
| hsa-miR-4523           | GACCGAGAGGGCCTCGGCTGT      | down | -inf | -inf  | 1.45E-03 |
| hsa-miR-127-5p_R+1     | CTGAAGCTCAGAGGGCTCTGATT    | down | 0.09 | -3.44 | 1.51E-03 |
| hsa-miR-3136-5p_R-1    | CTGACTGAATAGGTAGGGTCAT     | down | -inf | -inf  | 1.52E-03 |
| hsa-miR-671-5p_R+1     | AGGAAGCCCTGGAGGGGCTGGAGG   | down | 0.05 | -4.32 | 1.55E-03 |
| bta-miR-199c_L-1R+2    | ACAGTAGTCTGCACATTGGCT      | down | 0.06 | -4.08 | 1.58E-03 |
| hsa-miR-7151-3p_L+1    | CCTACAGGCTGGAATGGGCTCA     | down | -inf | -inf  | 1.65E-03 |
| hsa-miR-4999-5p        | TGCTGTATTGTCAGGTAGTGA      | down | -inf | -inf  | 1.68E-03 |
| hsa-miR-450a-2-3p_L-1  | TTGGGGACATTTTGCATTCAT      | down | 0.06 | -3.99 | 1.81E-03 |
| hsa-miR-4676-3p_L-1    | ACTGTTTCACCACTGGCTCTT      | down | 0.17 | -2.52 | 1.81E-03 |
| PC-5p-133941_74        | AAATTTGACTGGCTATTTT        | down | -inf | -inf  | 1.88E-03 |
| hsa-let-7f-5p          | TGAGGTAGTAGATTGTATAGTT     | down | 0.32 | -1.64 | 1.88E-03 |
| hsa-miR-12136_R+8      | GAAAAAGTCATGGAGGCCATGGGGTT | down | 0.19 | -2.37 | 1.89E-03 |
| hsa-miR-135a-3p_L+1R-1 | ATATAGGGATTGGAGCCGTGGC     | down | -inf | -inf  | 1.90E-03 |
| hsa-miR-9-5p           | TCTTTGGTTATCTAGCTGTATGA    | down | 0.05 | -4.45 | 1.94E-03 |
| hsa-miR-382-5p         | GAAGTTGTTTCGTGGTGGATTTCG   | down | 0.17 | -2.59 | 1.95E-03 |
| hsa-miR-3065-3p        | TCAGCACCAGGATATTGTTGGAG    | down | -inf | -inf  | 1.97E-03 |
| hsa-miR-651-5p_R-1     | TTTAGGATAAGCTTGACTTTT      | down | 0.24 | -2.06 | 1.98E-03 |

|                               |                          |      |      |       |          |
|-------------------------------|--------------------------|------|------|-------|----------|
| PC-5p-121193_83               | AAAAGTAATTGTGGTTTTTGTGT  | down | -inf | -inf  | 1.99E-03 |
| hsa-miR-4804-5p_L+1R-1_1ss7CG | TTTGGAGGGTAAGGTTAAGCA    | down | 0.11 | -3.19 | 2.00E-03 |
| hsa-miR-5010-3p_R+1           | TTTTGTGTCTCCCATTCCCCAGT  | down | 0.09 | -3.48 | 2.02E-03 |
| hsa-miR-6514-5p_R-1           | TATGGAGTGGACTTTCAGCTGG   | down | 0.08 | -3.66 | 2.05E-03 |
| hsa-miR-3164                  | TGTGACTTTAAGGGAAAATGGCG  | down | -inf | -inf  | 2.08E-03 |
| hsa-miR-429                   | TAATACTGTCTGGTAAAACCGT   | down | 0.19 | -2.42 | 2.09E-03 |
| hsa-miR-142-5p_L+2R-3         | CCCATAAAGTAGAAAGCACT     | up   | 2.35 | 1.23  | 2.20E-03 |
| hsa-miR-499a-5p               | TTAAGACTTGCAGTGATGTTT    | down | 0.22 | -2.18 | 2.21E-03 |
| hsa-miR-210-3p                | CTGTGCGTGTGACAGCGGCTGA   | down | 0.14 | -2.87 | 2.21E-03 |
| hsa-miR-503-5p_R-2_1ss21CA    | TAGCAGCGGGAACAGTTCTGA    | down | 0.31 | -1.70 | 2.30E-03 |
| mdo-miR-106-5p                | AAAAGTGCTTATAGTGCAGGTAG  | down | -inf | -inf  | 2.33E-03 |
| mdo-miR-153-1-5p_L+1          | GTCATTTTTGTGATCTGCAGCT   | down | 0.07 | -3.80 | 2.41E-03 |
| hsa-let-7i-5p                 | TGAGGTAGTAGTTTGTGCTGTT   | down | 0.53 | -0.90 | 2.50E-03 |
| hsa-miR-514a-3p_R-1           | ATTGACACTTCTGTGAGTAG     | down | -inf | -inf  | 2.50E-03 |
| hsa-miR-5187-5p               | TGGGATGAGGGATTGAAGTGGA   | down | 0.18 | -2.45 | 2.51E-03 |
| hsa-miR-380-5p_L+1R-1         | ATGGTTGACCATAGAACATGCG   | down | -inf | -inf  | 2.54E-03 |
| hsa-let-7g-5p                 | TGAGGTAGTAGTTTGTACAGTT   | down | 0.36 | -1.47 | 2.64E-03 |
| hsa-miR-450a-1-3p             | ATTGGGAACATTTTGCATGTAT   | down | 0.03 | -5.07 | 2.70E-03 |
| hsa-mir-1302-1-p5_1ss9AG      | GAATTTTCAGGTAAACAATGAAT  | down | 0.08 | -3.67 | 2.73E-03 |
| hsa-miR-181a-5p               | AACATTCAACGCTGTCGGTGAGT  | down | 0.63 | -0.68 | 2.74E-03 |
| PC-3p-147694_66               | AAGACTTTTTCTCTGACCT      | down | -inf | -inf  | 2.79E-03 |
| PC-5p-38571_359               | AATCCTCACTTTGAATCCATGT   | down | 0.07 | -3.76 | 2.81E-03 |
| rno-miR-539-5p_R+2            | GGAGAAATTATCCTTGGTGTGTTT | down | 0.04 | -4.59 | 2.82E-03 |
| hsa-miR-3191-3p_R-1_1ss22AT   | TGGGGACGTAGCTGGCCAGACT   | down | -inf | -inf  | 2.83E-03 |
| hsa-miR-20a-3p_R+1            | ACTGCATTATGAGCACTTAAAGT  | down | 0.05 | -4.23 | 2.84E-03 |
| hsa-miR-338-5p_R-1            | AACAATATCCTGGTGCTGAGT    | up   | 2.10 | 1.07  | 2.90E-03 |

|                             |                            |      |      |       |          |
|-----------------------------|----------------------------|------|------|-------|----------|
| hsa-miR-542-3p_R-2          | TGTGACAGATTGATAACTGA       | down | 0.14 | -2.87 | 2.91E-03 |
| hsa-miR-616-3p_L+1R-3       | AAGTCATTGGAGGGTTTGAG       | down | 0.11 | -3.15 | 2.94E-03 |
| hsa-mir-5100-p3_1ss17TC     | ATCCCAGCGGTGCCTCCA         | down | 0.05 | -4.38 | 2.94E-03 |
| mmu-miR-106a-5p             | CAAAGTGCTAACAGTGCAGGTAG    | down | -inf | -inf  | 2.98E-03 |
| hsa-miR-190b-5p             | TGATATGTTTGATATTGGGTTG     | down | 0.16 | -2.60 | 3.09E-03 |
| hsa-miR-452-5p_R+1          | AACTGTTTGCAGAGGAACTGAG     | down | 0.12 | -3.03 | 3.14E-03 |
| hsa-miR-190a-5p_R+1         | TGATATGTTTGATATATTAGGTT    | down | 0.00 | -8.17 | 3.22E-03 |
| hsa-miR-4645-3p_L+2R-1      | CGAGACAGTAGTTCCTTGCCCTGGT  | down | 0.16 | -2.60 | 3.25E-03 |
| mdo-miR-181a-5p_R+3_2       | AACATTCAACGCTGTCGGTGAGTTTT | down | 0.10 | -3.36 | 3.30E-03 |
| mdo-miR-181a-5p_R+3_1       | AACATTCAACGCTGTCGGTGAGTTAT | down | 0.10 | -3.36 | 3.30E-03 |
| eca-mir-8969-p3_1ss14GT     | GGTGGTTCAGTGGTAGAA         | down | 0.15 | -2.72 | 3.32E-03 |
| hsa-miR-660-5p_R+1          | TACCCATTGCATATCGGAGTTGT    | down | 0.34 | -1.54 | 3.43E-03 |
| PC-5p-49096_267             | AGCCTGGAAGCTGGAGCCTGCAG    | down | 0.17 | -2.57 | 3.48E-03 |
| hsa-miR-590-3p              | TAATTTTATGTATAAGCTAGT      | down | 0.17 | -2.54 | 3.49E-03 |
| hsa-miR-219b-5p             | AGATGTCCAGCCACAATTCTCG     | down | 0.12 | -3.04 | 3.60E-03 |
| hsa-miR-125a-5p_R-2         | TCCCTGAGACCCTTTAACCTGT     | up   | 3.49 | 1.80  | 3.69E-03 |
| hsa-miR-27b-5p              | AGAGCTTAGCTGATTGGTGAAC     | down | 0.23 | -2.12 | 3.77E-03 |
| hsa-miR-4750-5p_R+1         | CTCGGGCGGAGGTGGTTGAGTGT    | down | 0.03 | -5.10 | 3.80E-03 |
| hsa-miR-154-5p              | TAGGTTATCCGTGTTGCCTTCG     | down | -inf | -inf  | 3.84E-03 |
| hsa-miR-11401_R+1           | TCACGTCTGCGGCTGTCACGT      | down | 0.23 | -2.13 | 3.85E-03 |
| hsa-miR-1278_R-2            | TAGTACTGTGCATATCATCT       | down | 0.10 | -3.37 | 3.90E-03 |
| mml-miR-378d_L-1R-1_1ss21CT | CTGGACTTGGAGTCAGAAGT       | down | -inf | -inf  | 3.93E-03 |
| PC-3p-128672_77             | TTGGGGAGTTTACTGGAGGAAG     | down | -inf | -inf  | 4.10E-03 |
| hsa-miR-135a-5p             | TATGGCTTTTTTATTCCTATGTGA   | down | 0.03 | -4.85 | 4.15E-03 |
| hsa-miR-19a-3p              | TGTGCAAATCTATGCAAAACTGA    | down | 0.31 | -1.67 | 4.17E-03 |
| hsa-miR-1-3p                | TGGAATGTAAAGAAGTATGTAT     | down | 0.17 | -2.53 | 4.28E-03 |

|                                    |                          |      |      |       |          |
|------------------------------------|--------------------------|------|------|-------|----------|
| hsa-miR-5585-3p                    | CTGAATAGCTGGGACTACAGGT   | down | -inf | -inf  | 4.42E-03 |
| hsa-miR-335-5p                     | TCAAGAGCAATAACGAAAAATGT  | up   | 1.61 | 0.68  | 4.47E-03 |
| hsa-miR-130a-3p                    | CAGTGCAATGTAAAAGGGCAT    | down | 0.29 | -1.79 | 4.50E-03 |
| hsa-miR-548az-5p_L-<br>2R+1_1ss8GA | AAAGTAATTGTGGTTTTTGCT    | down | 0.02 | -5.40 | 4.55E-03 |
| hsa-mir-548ac-p5_1ss6TA            | AAAGTAATTGTGGTTTTTGCT    | down | 0.02 | -5.40 | 4.55E-03 |
| cgr-miR-1260_L-1R+2_5              | TCCCACCGCTGCCACCATA      | down | -inf | -inf  | 4.58E-03 |
| cgr-miR-1260_L-1R+2_1              | TCCCACCGCTGCCACCAA       | down | -inf | -inf  | 4.58E-03 |
| cgr-miR-1260_L-1R+2_3              | TCCCACCGCTGCCACCAAT      | down | -inf | -inf  | 4.58E-03 |
| cgr-miR-1260_L-1R+2_4              | TCCCACCGCTGCCACCAGA      | down | -inf | -inf  | 4.58E-03 |
| cgr-miR-1260_L-1R+2_2              | TCCCACCGCTGCCACCAAG      | down | -inf | -inf  | 4.58E-03 |
| hsa-miR-223-5p_R+2                 | CGTGTATTTGACAAGCTGAGTTGG | down | 0.28 | -1.83 | 4.60E-03 |
| hsa-miR-3174_R-1                   | TAGTGAGTTAGAGATGCAGAGC   | down | 0.05 | -4.43 | 4.75E-03 |
| hsa-miR-6764-5p                    | TCCCAGGGTCTGGTCAGAGTTG   | down | -inf | -inf  | 4.78E-03 |
| hsa-miR-3691-5p_L+1R-2             | TAGTGGATGATGGAGACTCGGT   | down | -inf | -inf  | 5.09E-03 |
| hsa-miR-4533_R+2                   | TGGAAGGAGGTTGCCGGACGCTGT | down | -inf | -inf  | 5.24E-03 |
| hsa-miR-5581-3p                    | TTCCATGCCCTCCTAGAAGTTCC  | down | -inf | -inf  | 5.27E-03 |
| hsa-miR-224-5p_L-1                 | CAAGTCACTAGTGGTTCCGTTTAG | down | 0.32 | -1.67 | 5.49E-03 |
| hsa-miR-379-5p                     | TGGTAGACTATGGAACGTAGG    | down | 0.19 | -2.41 | 5.50E-03 |
| hsa-miR-532-5p                     | CATGCCTTGAGTGTAGGACCGT   | down | 0.48 | -1.06 | 5.66E-03 |
| hsa-miR-6842-3p                    | TTGGCTGGTCTCTGCTCCGCAG   | down | 0.05 | -4.26 | 5.74E-03 |
| PC-3p-103492_100                   | GAAATAATCTATTCTGAGGCTTT  | down | 0.14 | -2.82 | 5.81E-03 |
| hsa-miR-30e-5p_R+2                 | TGTAACATCCTTGACTGGAAGCT  | down | 0.67 | -0.57 | 5.82E-03 |
| cgr-miR-130b-3p_R+2                | CAGTGCAATGATGAAAGGGCATT  | down | -inf | -inf  | 5.83E-03 |
| PC-3p-92753_115                    | AATTTGACTGGCTTATTT       | down | 0.05 | -4.21 | 5.90E-03 |
| hsa-miR-4799-5p                    | ATCTAAATGCAGCATGCCAGTC   | down | -inf | -inf  | 6.09E-03 |

|                        |                          |      |      |       |          |
|------------------------|--------------------------|------|------|-------|----------|
| hsa-miR-4662a-5p       | TTAGCCAATTGTCCATCTTTAG   | down | 0.13 | -2.90 | 6.20E-03 |
| hsa-miR-1179_R+1       | AAGCATTCTTTTCATTGGTTGGT  | down | -inf | -inf  | 6.21E-03 |
| ggo-mir-1277-p5        | TATATATATATATGTACGTAT    | down | 0.08 | -3.60 | 6.21E-03 |
| mmu-miR-107-5p_R+1     | AGCTTCTTTACAGTGTTCCTTGT  | down | -inf | -inf  | 6.29E-03 |
| hsa-miR-6755-5p        | TAGGGTAGACACTGACAACGTT   | down | -inf | -inf  | 6.32E-03 |
| PC-3p-62500_195        | AAATCTCGCTGGGGCCTCCA     | down | -inf | -inf  | 6.38E-03 |
| hsa-miR-6516-5p_R-1    | TTTGCAGTAACAGGTGTGAGC    | down | 0.21 | -2.24 | 6.38E-03 |
| hsa-miR-6866-5p_R-2    | TTAGAGGCTGGAATAGAGATT    | down | 0.17 | -2.54 | 6.44E-03 |
| hsa-miR-34c-5p         | AGGCAGTGTAGTTAGCTGATTGC  | down | -inf | -inf  | 6.52E-03 |
| hsa-miR-539-5p         | GGAGAAATTATCCTTGGTGTGT   | down | 0.03 | -4.93 | 6.67E-03 |
| mmu-miR-452-3p_1ss20GA | TCAGTCTCATCTGCAAAGAAGT   | down | 0.01 | -6.60 | 6.73E-03 |
| hsa-miR-23a-3p_R+1     | ATCACATTGCCAGGGATTTCCA   | down | 0.52 | -0.93 | 6.73E-03 |
| mmu-let-7j_1ss8TG      | TGAGGTAGTAGTTTGTGCTGTTAT | down | 0.28 | -1.85 | 6.91E-03 |
| mmu-miR-421-5p         | CTCATTAATGTTTGTGTAAT     | down | -inf | -inf  | 6.92E-03 |
| mmu-miR-1839-3p        | AGACCTACTTATCTACCAACAGC  | down | 0.25 | -2.01 | 7.01E-03 |
| PC-5p-124265_81        | CTCGCTGTAGCATCGAACCCT    | down | 0.12 | -3.09 | 7.07E-03 |
| hsa-miR-19b-1-5p       | AGTTTTGCAGGTTTGCATCCAGC  | down | -inf | -inf  | 7.10E-03 |
| hsa-miR-4742-5p        | TCAGGCAAAGGGATATTTACAGA  | down | 0.16 | -2.67 | 7.21E-03 |
| PC-3p-103652_100       | AGTTGTAGGATGCTAAACAGA    | down | -inf | -inf  | 7.24E-03 |
| hsa-miR-376a-3p        | ATCATAGAGGAAAATCCACGT    | down | 0.08 | -3.62 | 7.39E-03 |
| hsa-miR-4743-5p        | TGGCCGGATGGGACAGGAGGCAT  | down | -inf | -inf  | 7.44E-03 |
| hsa-miR-6505-5p        | TTGGAATAGGGGATATCTCAGC   | down | -inf | -inf  | 7.52E-03 |
| PC-5p-146_367656       | TTCTCTTTCCGGCACCA        | up   | 5.58 | 2.48  | 7.74E-03 |
| hsa-miR-4676-5p        | GAGCCAGTGGTGAGACAGTGA    | down | -inf | -inf  | 7.94E-03 |
| hsa-miR-511-5p         | GTGTCTTTTGTCTGCAGTCA     | down | 0.08 | -3.72 | 8.33E-03 |
| hsa-miR-4659b-5p_R+3   | TTGCCATGTCTAAGAAGAAAAT   | down | -inf | -inf  | 8.38E-03 |

|                             |                             |      |      |       |          |
|-----------------------------|-----------------------------|------|------|-------|----------|
| hsa-miR-6862-5p             | CGGGCATGCTGGGAGAGACTTT      | down | -inf | -inf  | 8.41E-03 |
| hsa-miR-324-3p_L-3R+1       | ACTGCCCCAGGTGCTGCTGGA       | down | 0.16 | -2.67 | 8.45E-03 |
| PC-3p-84256_131             | CGCGTGGCCTGCTGGGAGTTGT      | down | -inf | -inf  | 8.78E-03 |
| PC-3p-168185_56             | TCCCCAACCCCTGCCCGCAGT       | down | -inf | -inf  | 9.19E-03 |
| hsa-miR-19b-3p              | TGTGCAAATCCATGCAAACTGA      | down | 0.47 | -1.08 | 9.24E-03 |
| hsa-miR-4638-5p             | ACTCGGCTGCGGTGGACAAGT       | down | 0.12 | -3.08 | 9.26E-03 |
| PC-3p-76092_150             | CGCCTGTCTCATTCTCTGCAGT      | down | 0.19 | -2.43 | 9.65E-03 |
| hsa-miR-3617-5p             | AAAGACATAGTTGCAAGATGGG      | down | 0.01 | -6.32 | 9.68E-03 |
| tch-let-7a-5p               | TAAGGTAGTAGATTGTATAGTT      | down | 0.13 | -2.96 | 9.72E-03 |
| PC-5p-388722_24             | TAAGGCCATCGTAAGTTGAAA       | down | -inf | -inf  | 9.87E-03 |
| hsa-miR-1306-3p_R+4         | ACGTTGGCTCTGGTGGTGATGT      | down | 0.22 | -2.17 | 9.95E-03 |
| mdo-miR-181b-5p_R+3         | AACATTCATTGCTGTCCGGTGGGTTGT | down | -inf | -inf  | 1.03E-02 |
| hsa-miR-329-5p              | GAGGTTTTCTGGGTTTCTGTTTC     | down | -inf | -inf  | 1.03E-02 |
| pal-miR-9993b-3p_L+1_1ss2AT | TTTCTCGCTGGGGCCCTCCA        | down | -inf | -inf  | 1.06E-02 |
| hsa-miR-29c-5p_R-1          | TGACCGATTTCTCCTGGTGTT       | down | 0.32 | -1.65 | 1.08E-02 |
| PC-5p-203106_47             | AAATGTAAGTGCAGTTTTTGGGA     | down | -inf | -inf  | 1.10E-02 |
| dno-miR-146a-5p_L-5         | ACTGAATCCATGGGTTT           | down | 0.04 | -4.67 | 1.10E-02 |
| hsa-miR-548ay-5p_R-1        | AAAAGTAATTGTGGTTTTTTG       | down | 0.38 | -1.40 | 1.11E-02 |
| ppy-miR-548a                | AAAAGTAATTGTGGTTTTTTG       | down | 0.38 | -1.40 | 1.11E-02 |
| hsa-miR-548ad-5p            | AAAAGTAATTGTGGTTTTTTG       | down | 0.38 | -1.40 | 1.11E-02 |
| hsa-miR-3611_R-2            | TTGTGAAGAAAGAAATTCT         | down | 0.13 | -2.97 | 1.13E-02 |
| hsa-miR-92b-5p_R-2          | AGGGACGGGACGCGGTGCAG        | down | 0.08 | -3.69 | 1.18E-02 |
| hsa-miR-5698                | TGGGGGAGTGCAGTGATTGTGG      | down | -inf | -inf  | 1.19E-02 |
| bta-miR-20b_R+1             | CAAAGTGCTCACAGTGCAGGTAG     | down | -inf | -inf  | 1.20E-02 |
| hsa-miR-627-5p_1ss2TG       | GGGAGTCTCTAAGAAAAGAGGA      | down | 0.02 | -5.37 | 1.20E-02 |
| cgr-miR-532-5p_R+2_2        | CATGCCTTGAGTGTAGGACCGTTA    | down | -inf | -inf  | 1.21E-02 |

|                          |                          |      |      |       |          |
|--------------------------|--------------------------|------|------|-------|----------|
| cgr-miR-532-5p_R+2_1     | CATGCCTTGAGTGTAGGACCGTAA | down | -inf | -inf  | 1.21E-02 |
| PC-3p-43735_309          | CCCGCCCTCCGCGCCCCCAT     | down | 0.03 | -5.15 | 1.22E-02 |
| hsa-miR-181d-3p_1ss21CT  | CCACCGGGGGATGAATGTCAT    | down | -inf | -inf  | 1.22E-02 |
| hsa-miR-196b-5p_R-1      | TAGGTAGTTTCCTGTTGTTGG    | down | 0.32 | -1.63 | 1.22E-02 |
| hsa-miR-7843-5p          | GAGGGCAGAGCCAGCTTCCTGA   | down | -inf | -inf  | 1.23E-02 |
| hsa-miR-449a             | TGGCAGTGTATTGTTAGCTGGT   | down | -inf | -inf  | 1.26E-02 |
| PC-3p-146542_66          | CAACAGGCCTTGCTCTGCTCACA  | down | 0.09 | -3.42 | 1.26E-02 |
| hsa-miR-92b-3p           | TATTGCACTCGTCCCGGCCTCC   | up   | 3.51 | 1.81  | 1.27E-02 |
| hsa-miR-548ax_R-1        | AGAAGTAATTGCGGTTTTGCC    | down | 0.20 | -2.34 | 1.28E-02 |
| hsa-miR-342-3p_R+1       | TCTCACACAGAAATCGCACCCGTC | up   | 3.24 | 1.70  | 1.28E-02 |
| mmu-miR-5126_L-4_1ss18CT | GCGGGGCCGGGGGTGGGG       | down | -inf | -inf  | 1.29E-02 |
| hsa-miR-155-5p_R-1       | TTAATGCTAATCGTGATAGGGGT  | down | 0.44 | -1.20 | 1.29E-02 |
| hsa-miR-4521_R+1         | GCTAAGGAAGTCCTGTGCTCAGT  | down | 0.21 | -2.23 | 1.29E-02 |
| hsa-miR-30b-3p           | CTGGGAGGTGGATGTTTACTTC   | down | 0.25 | -2.01 | 1.30E-02 |
| cgr-miR-1260_R+1_2       | ATCCCACCGCTGCCACCAG      | down | -inf | -inf  | 1.31E-02 |
| cgr-miR-1260_R+1_1       | ATCCCACCGCTGCCACCAA      | down | -inf | -inf  | 1.31E-02 |
| hsa-miR-301a-3p          | CAGTGCAATAGTATTGTCAAAGC  | down | 0.25 | -2.02 | 1.32E-02 |
| PC-3p-94741_112          | CCAGGTGTCTTCCATTCTGTCC   | down | 0.07 | -3.80 | 1.33E-02 |
| hsa-miR-3190-3p_L-2R+2   | TGGAAGGTAGACGGCCAGAGAGT  | down | 0.23 | -2.10 | 1.36E-02 |
| hsa-miR-501-3p           | AATGCACCCGGGCAAGGATTCT   | up   | 4.54 | 2.18  | 1.36E-02 |
| hsa-miR-2278_L-1R+1      | AGAGCAGTGTGTGTTGCCTGGG   | down | -inf | -inf  | 1.37E-02 |
| hsa-miR-378i_R+1_1ss9AT  | ACTGGACTTGGAGTCAGAAGGT   | down | 0.37 | -1.42 | 1.39E-02 |
| bta-miR-378_1ss4GT       | ACTTGACTTGGAGTCAGAAGGC   | down | -inf | -inf  | 1.41E-02 |
| pal-miR-9995-3p_1ss15TA  | ATCTCGGTGGAACCACCA       | down | 0.02 | -5.89 | 1.42E-02 |
| hsa-miR-186-5p           | CAAAGAATTCTCTTTTTGGGCT   | up   | 1.72 | 0.78  | 1.43E-02 |
| hsa-miR-7-5p_R-1         | TGGAAGACTAGTGATTTTGTGT   | down | 0.41 | -1.28 | 1.43E-02 |



|                     |                         |      |      |       |          |
|---------------------|-------------------------|------|------|-------|----------|
| hsa-miR-181a-2-3p   | ACCACTGACCGTTGACTGTACC  | up   | 1.77 | 0.83  | 1.45E-02 |
| PC-5p-4861_2738     | GCCTGTACTCTTTATCCT      | up   | 7.38 | 2.88  | 1.47E-02 |
| PC-3p-4861_2738     | GCCTGTACTCTTTATCCT      | up   | 7.38 | 2.88  | 1.47E-02 |
| hsa-miR-191-5p      | CAACGGAATCCCAAAAGCAGCTG | up   | 2.51 | 1.33  | 1.51E-02 |
| hsa-miR-584-5p_R-1  | TTATGGTTTGCCTGGGACTGA   | down | 0.66 | -0.61 | 1.52E-02 |
| bta-miR-191b_1ss2AG | GGACGAAATCCAAGCGCAGCTG  | down | -inf | -inf  | 1.52E-02 |
| hsa-miR-3913-5p     | TTTGGGACTGATCTTGATGTCT  | down | 0.27 | -1.91 | 1.53E-02 |
| hsa-miR-6892-5p     | GTAAGGGACCGGAGAGTAGGA   | down | -inf | -inf  | 1.54E-02 |
| hsa-miR-410-3p      | AATATAACACAGATGGCCTGT   | down | 0.29 | -1.80 | 1.56E-02 |
| hsa-miR-378d_R-2    | ACTGGACTTGGAGTCAGA      | down | 0.21 | -2.26 | 1.57E-02 |
| hsa-miR-423-3p      | AGCTCGGTCTGAGGCCCTCAGT  | down | 0.71 | -0.49 | 1.58E-02 |
| hsa-miR-590-5p      | GAGCTTATTCATAAAAAGTGCAG | down | -inf | -inf  | 1.59E-02 |
| hsa-miR-3661_R+1    | TGACCTGGGACTCGGACAGCTGT | down | 0.11 | -3.13 | 1.59E-02 |
| hsa-miR-127-3p      | TCGGATCCGTCTGAGCTTGGCT  | up   | 3.85 | 1.94  | 1.59E-02 |
| hsa-miR-143-5p_R-1  | GGTGCAGTGCTGCATCTCTGG   | down | 0.12 | -3.07 | 1.64E-02 |
| hsa-miR-490-5p      | CCATGGATCTCCAGGTGGGT    | down | -inf | -inf  | 1.65E-02 |
| PC-3p-4847_2746     | GAAGTGGGGTTGTGGGAAT     | up   | 9.11 | 3.19  | 1.70E-02 |
| hsa-miR-7110-5p_R+1 | TGGGGGTGTGGGGAGAGAGAGT  | down | -inf | -inf  | 1.72E-02 |
| PC-3p-151959_63     | CCTACAGGCTGGAATGGGCTCAT | down | -inf | -inf  | 1.75E-02 |
| hsa-miR-9983-3p     | TTTTTTGCTGGAACATTTCTGG  | down | -inf | -inf  | 1.76E-02 |
| PC-3p-243877_40     | TGCAGCATAGGGCAGTTAGGA   | down | -inf | -inf  | 1.77E-02 |
| PC-5p-207873_46     | AAATATGATTTGGAAGATTGTG  | down | -inf | -inf  | 1.77E-02 |
| hsa-miR-627-3p      | TCTTTTCTTTGAGACTCACT    | up   | 4.87 | 2.29  | 1.78E-02 |
| hsa-miR-98-5p       | TGAGGTAGTAAGTTGTATTGTT  | down | 0.48 | -1.05 | 1.80E-02 |
| hsa-mir-548ag-2-p3  | CAAGAACCTCAATTACCTTTGC  | down | 0.22 | -2.21 | 1.81E-02 |
| hsa-miR-330-3p      | GCAAAGCACACGGCCTGCAGAGA | down | 0.44 | -1.18 | 1.81E-02 |

|                            |                          |      |       |       |          |
|----------------------------|--------------------------|------|-------|-------|----------|
| PC-3p-129011_77            | TGAGCTCTCTGCACTCCCAGG    | down | 0.11  | -3.18 | 1.83E-02 |
| hsa-miR-151a-5p            | TCGAGGAGCTCACAGTCTAGT    | down | 0.69  | -0.53 | 1.85E-02 |
| dno-miR-134-5p_R+1_1ss22CA | TGTGACTGGTTGACCAGAGGGAT  | down | 0.16  | -2.67 | 1.86E-02 |
| eca-miR-8986a_R-1_1ss1TG   | GAGTGTGCTAGAGTCCCTCGAAGA | down | -inf  | -inf  | 1.87E-02 |
| hsa-miR-664b-3p            | TTCATTTGCCTCCCAGCCTACA   | down | -inf  | -inf  | 1.88E-02 |
| hsa-miR-29a-5p_R-1         | ACTGATTTCTTTTGGTGTTC     | down | 0.08  | -3.71 | 1.90E-02 |
| mmu-mir-1983-p5_1ss1GA     | AAAAGCATGCTCCAGTGGCGC    | down | -inf  | -inf  | 1.92E-02 |
| hsa-miR-378e_R+1_1ss18GA   | ACTGGACTTGGAGTCAGAAC     | down | -inf  | -inf  | 1.92E-02 |
| hsa-miR-433-3p             | ATCATGATGGGCTCCTCGGTGT   | down | 0.37  | -1.43 | 1.95E-02 |
| eca-mir-191b-p3_1ss23CT    | CTGCTTTTGGGATTCCGTTGCCT  | down | -inf  | -inf  | 1.96E-02 |
| hsa-miR-194-3p_R-1         | CCAGTGGGGCTGCTGTTATCT    | down | -inf  | -inf  | 1.96E-02 |
| hsa-miR-200c-3p            | TAATACTGCCGGTAATGATGGA   | down | 0.45  | -1.17 | 2.02E-02 |
| PC-5p-135472_73            | TGGGGTGGAGTAGGGCAGGAA    | down | 0.10  | -3.37 | 2.06E-02 |
| pal-miR-9993a-3p           | ATCTCGGTGGGACCTCCA       | down | 0.32  | -1.63 | 2.06E-02 |
| hsa-miR-6819-5p            | TTGGGGTGGAGGGCCAAGGAGC   | down | -inf  | -inf  | 2.09E-02 |
| hsa-miR-222-5p_R-1         | CTCAGTAGCCAGTGTAGATCC    | down | 0.16  | -2.65 | 2.09E-02 |
| PC-5p-247305_39            | CCATCCTGACTCTACCTGGCTGT  | down | -inf  | -inf  | 2.10E-02 |
| hsa-miR-3127-5p            | ATCAGGGCTTGTGGAATGGGAAG  | down | 0.10  | -3.31 | 2.10E-02 |
| PC-5p-234738_41            | GTTCCCTCTTCTTAACACCA     | down | -inf  | -inf  | 2.13E-02 |
| hsa-miR-552-5p_L+1         | TGTTTAAACCTTTTGCCTGTTGG  | down | 0.04  | -4.65 | 2.14E-02 |
| hsa-miR-3675-5p_L-1        | ATGGGGCTTCTGTAGAGATTTC   | down | 0.07  | -3.80 | 2.15E-02 |
| hsa-miR-99b-3p_R+1         | CAAGCTCGTGTCTGTGGGTCCGT  | down | 0.33  | -1.58 | 2.15E-02 |
| hsa-miR-6767-5p            | TCGCAGACAGGGACACATGGAGA  | down | 0.09  | -3.42 | 2.15E-02 |
| PC-3p-82011_136            | TCCTGGAGCTGGGCAGATGGGA   | down | 0.15  | -2.75 | 2.21E-02 |
| bta-miR-2478_L-1_1ss2TA    | AATCCCCTTCTGACACCA       | up   | 17.87 | 4.16  | 2.24E-02 |
| PC-3p-136753_72            | TGTCTAGACAAGGCTGGGGAA    | down | 0.07  | -3.92 | 2.24E-02 |

|                       |                           |      |       |       |          |
|-----------------------|---------------------------|------|-------|-------|----------|
| PC-3p-8405_1605       | TAGTTGTTGGGGATTACT        | up   | 19.52 | 4.29  | 2.27E-02 |
| PC-5p-6976_1912       | AGAGCGTTCTGTAAGCCT        | up   | 16.59 | 4.05  | 2.29E-02 |
| hsa-miR-509-3p        | TGATTGGTACGTCTGTGGGTAG    | down | -inf  | -inf  | 2.31E-02 |
| PC-5p-99555_105       | TTAGTCTAGCACCTGGTCAATTC   | down | 0.12  | -3.07 | 2.32E-02 |
| hsa-miR-376b-3p_R-1   | ATCATAGAGGAAAATCCATGT     | down | -inf  | -inf  | 2.33E-02 |
| hsa-miR-1268b_R-2     | CGGGCGTGGTGGTGGGGG        | down | -inf  | -inf  | 2.34E-02 |
| hsa-miR-1268a         | CGGGCGTGGTGGTGGGGG        | down | -inf  | -inf  | 2.34E-02 |
| PC-3p-17720_825       | TGCACAGTACGAGAGGAAC       | up   | 8.18  | 3.03  | 2.36E-02 |
| PC-3p-133316_74       | TCACTCTAGGGTTGGGGACAGT    | down | 0.18  | -2.50 | 2.38E-02 |
| hsa-mir-3922-p3       | TGTGGGACTTCTGGCCTTGA      | down | 0.21  | -2.22 | 2.38E-02 |
| hsa-miR-340-3p_R+1    | TCCGTCTCAGTTACTTTATAGCC   | up   | 2.99  | 1.58  | 2.39E-02 |
| PC-3p-106369_97       | AGTTGGATCTTGGGAGAAA       | down | -inf  | -inf  | 2.41E-02 |
| hsa-miR-374b-3p       | CTTAGCAGGTTGTATTATCATT    | down | 0.31  | -1.70 | 2.43E-02 |
| hsa-miR-4661-5p_R-1   | AACTAGCTCTGTGGATCCTGA     | down | -inf  | -inf  | 2.43E-02 |
| hsa-miR-491-3p        | CTTATGCAAGATTCCCTTCTAC    | down | -inf  | -inf  | 2.45E-02 |
| hsa-miR-11400_1ss20TC | TCGGCTGTGTATCTCTGTGCC     | down | 0.60  | -0.74 | 2.49E-02 |
| PC-3p-164451_58       | TTGGTCAATGTATTGGTCTGCAT   | down | 0.17  | -2.56 | 2.51E-02 |
| mmu-let-7c-5p_R+2     | TGAGGTAGTAGGTTGTATGGTTAT  | down | 0.14  | -2.82 | 2.52E-02 |
| PC-3p-6927_1922       | GAGGTTGGCTTAGAAGCAGC      | up   | 25.62 | 4.68  | 2.55E-02 |
| hsa-miR-548d-3p       | CAAAAACCACAGTTTCTTTTGC    | down | -inf  | -inf  | 2.55E-02 |
| hsa-miR-4765          | TGAGTGATTGATAGCTATGTTC    | down | -inf  | -inf  | 2.58E-02 |
| mmu-miR-339-5p_R+2    | TCCCTGTCCTCCAGGAGCTCACGAA | down | 0.18  | -2.49 | 2.60E-02 |
| hsa-miR-551b-3p_R+1   | GCGACCCATACTTGGTTTCAGT    | down | 0.21  | -2.28 | 2.61E-02 |
| hsa-miR-96-5p_R-2     | TTTGGCACTAGCACATTTTGT     | up   | 12.11 | 3.60  | 2.62E-02 |
| hsa-miR-3198          | GTGGAGTCCTGGGGAATGGAGA    | down | 0.10  | -3.35 | 2.64E-02 |
| hsa-miR-6803-3p_R-1   | TCCCTCGCCTTCTCACCTCA      | down | 0.06  | -3.99 | 2.65E-02 |

|                          |                          |      |       |       |          |
|--------------------------|--------------------------|------|-------|-------|----------|
| mmu-miR-1187_R-2_1ss8GA  | TATGTGTATGTGTATGTGTGT    | down | -inf  | -inf  | 2.66E-02 |
| PC-3p-1495_12859         | CGAGTCCCATCAGCCACCCCA    | up   | 12.76 | 3.67  | 2.67E-02 |
| hsa-miR-4508_L+2R-1      | AAGCGGGGCTGGGCGCGC       | up   | 3.87  | 1.95  | 2.70E-02 |
| hsa-miR-362-3p_1ss22AT   | AACACACCTATTCAAGGATTCT   | down | -inf  | -inf  | 2.71E-02 |
| mmu-miR-431-5p_R-1       | TGTCTTGCAGGCCGTCATGC     | down | 0.29  | -1.79 | 2.71E-02 |
| hsa-miR-7705_R-1         | AATAGCTCAGAATGTCAGTTCT   | down | -inf  | -inf  | 2.72E-02 |
| hsa-miR-769-3p_L-1R+1    | TGGGATCTCCGGGGTCTTGTTTT  | down | 0.28  | -1.85 | 2.75E-02 |
| hsa-miR-487a-3p          | AATCATAACAGGGACATCCAGTT  | down | 0.24  | -2.05 | 2.76E-02 |
| hsa-miR-548ba            | AAAGGTAAGTGTGATTTTTGCT   | down | -inf  | -inf  | 2.78E-02 |
| hsa-miR-324-5p_R+1       | CGCATCCCCTAGGGCATTGGTGT  | down | 0.46  | -1.14 | 2.82E-02 |
| hsa-miR-1185-1-3p        | ATATACAGGGGGAGACTCTTAT   | down | 0.32  | -1.63 | 2.82E-02 |
| hsa-miR-144-3p_R-1       | TACAGTATAGATGATGTAC      | up   | 9.16  | 3.20  | 2.84E-02 |
| hsa-miR-4473_R-1         | CTAGTGCTCTCCGTTACAAGT    | down | -inf  | -inf  | 2.86E-02 |
| PC-3p-29103_499          | CTTGAGACTCTGGGTCAGT      | down | -inf  | -inf  | 2.92E-02 |
| hsa-miR-376c-5p_L-1R+2   | GTGGATATTCCTTCTATGTTTA   | down | -inf  | -inf  | 2.93E-02 |
| hsa-miR-376b-5p_L-1R+1   | GTGGATATTCCTTCTATGTTTA   | down | -inf  | -inf  | 2.93E-02 |
| hsa-let-7a-5p            | TGAGGTAGTAGGTTGTATAGTT   | down | 0.57  | -0.81 | 3.00E-02 |
| PC-5p-131452_76          | AGATGGGGAGAACTCAATCCT    | down | 0.15  | -2.74 | 3.02E-02 |
| hsa-miR-493-5p           | TTGTACATGGTAGGCTTTCATT   | down | 0.43  | -1.22 | 3.06E-02 |
| hsa-miR-548au-5p_R-1     | AAAAGTAATTGCGGTTTTTG     | down | 0.22  | -2.18 | 3.09E-02 |
| hsa-miR-548am-5p_R-2     | AAAAGTAATTGCGGTTTTTG     | down | 0.22  | -2.18 | 3.09E-02 |
| pal-miR-9993a-3p_1ss11GA | ATCTCGGTGGAACCTCCA       | down | 0.43  | -1.21 | 3.09E-02 |
| pal-miR-9995-3p          | ATCTCGGTGGAACCTCCA       | down | 0.43  | -1.21 | 3.09E-02 |
| PC-5p-61866_198          | AGTCCGGCCTCACTACCA       | up   | inf   | inf   | 3.11E-02 |
| hsa-miR-30c-5p_R+1       | TGTAAACATCCTACACTCTCAGCT | up   | 1.56  | 0.64  | 3.12E-02 |
| hsa-miR-654-3p_R-2       | TATGTCTGCTGACCATCACC     | up   | 3.82  | 1.93  | 3.12E-02 |

|                          |                          |      |        |       |          |
|--------------------------|--------------------------|------|--------|-------|----------|
| pal-miR-9993b-3p_L+1_1   | AATCTCGCTGGGGCCTCCA      | down | 0.29   | -1.79 | 3.17E-02 |
| pal-miR-9993b-3p_L+1_2   | CATCTCGCTGGGGCCTCCA      | down | 0.29   | -1.79 | 3.17E-02 |
| pal-miR-9993b-3p_L+1_3   | GATCTCGCTGGGGCCTCCA      | down | 0.29   | -1.79 | 3.17E-02 |
| hsa-miR-100-5p_R-1       | AACCCGTAGATCCGAACCTTGT   | up   | 7.86   | 2.98  | 3.23E-02 |
| hsa-miR-181b-2-3p_L+1R+1 | ACTCACTGATCAATGAATGCAA   | down | 0.21   | -2.24 | 3.29E-02 |
| pal-miR-9995-3p_1ss1AG   | GTCTCGGTGGAACCTCCA       | down | 0.16   | -2.63 | 3.29E-02 |
| PC-3p-11702_1197         | AAAGTGGACGTATAGGGT       | up   | 20.71  | 4.37  | 3.33E-02 |
| PC-3p-85981_127          | AAGGTCAGCTCAATGAGAA      | up   | 599.05 | 9.23  | 3.37E-02 |
| hsa-miR-5587-5p_R+2      | ATGGTCACCTCCGGGACTCT     | down | -inf   | -inf  | 3.37E-02 |
| hsa-miR-484              | TCAGGCTCAGTCCCCTCCCGAT   | up   | 1.35   | 0.43  | 3.39E-02 |
| hsa-miR-199a-5p          | CCCAGTGTTTCAGACTACCTGTTC | up   | 2.56   | 1.36  | 3.41E-02 |
| hsa-miR-6500-3p          | ACACTTGTTGGGATGACCTGC    | down | 0.23   | -2.13 | 3.42E-02 |
| hsa-miR-99a-5p_R-1       | AACCCGTAGATCCGATCTTGT    | up   | 4.54   | 2.18  | 3.45E-02 |
| hsa-miR-487b-3p          | AATCGTACAGGGTCATCCACTT   | down | 0.32   | -1.66 | 3.49E-02 |
| hsa-miR-379-3p_R-1       | TATGTAACATGGTCCACTAAC    | down | 0.31   | -1.68 | 3.63E-02 |
| hsa-miR-1249-3p          | ACGCCCTTCCCCCCTTCTTCA    | down | 0.27   | -1.90 | 3.69E-02 |
| hsa-miR-5588-5p          | ACTGGCATTAGTGGGACTTTT    | down | -inf   | -inf  | 3.69E-02 |
| hsa-miR-655-3p           | ATAATACATGGTTAACCTCTTT   | down | 0.19   | -2.40 | 3.79E-02 |
| hsa-miR-3120-5p_R-1      | CCTGTCTGTGCCTGCTGTAC     | down | 0.15   | -2.73 | 3.83E-02 |
| hsa-miR-548b-3p          | CAAGAACCTCAGTTGCTTTTGT   | down | 0.18   | -2.45 | 3.85E-02 |
| hsa-miR-361-5p           | TTATCAGAATCTCCAGGGGTAC   | up   | 2.92   | 1.55  | 3.93E-02 |
| hsa-miR-3146_R+1         | CATGCTAGGATAGAAAGAATGGG  | down | -inf   | -inf  | 3.94E-02 |
| hsa-miR-7-1-3p           | CAACAAATCACAGTCTGCCATA   | down | 0.39   | -1.34 | 3.97E-02 |
| hsa-miR-139-5p           | TCTACAGTGCACGTGTCTCCAGT  | down | 0.47   | -1.08 | 3.98E-02 |
| hsa-miR-7856-5p          | TTTTAAGGACACTGAGGGATC    | down | 0.12   | -3.02 | 4.01E-02 |
| hsa-miR-424-5p_R-1       | CAGCAGCAATTCATGTTTTGA    | down | 0.35   | -1.51 | 4.02E-02 |

|                             |                         |      |       |       |          |
|-----------------------------|-------------------------|------|-------|-------|----------|
| cja-miR-556_R+1             | GATGAGCTCATTGTAATATGAA  | down | -inf  | -inf  | 4.06E-02 |
| hsa-miR-6809-5p_L+1R-1      | TTGGCAAGGAAAGAAGAGGATC  | down | 0.25  | -1.98 | 4.10E-02 |
| mmu-miR-101c_L+1R+2         | TACAGTACTGTGATAACTGATC  | down | -inf  | -inf  | 4.10E-02 |
| hsa-miR-370-3p              | GCCTGCTGGGGTGGAACCTGGT  | up   | 2.58  | 1.37  | 4.11E-02 |
| PC-5p-17547_833             | CCCACCAGGAGCCTGGCACTGT  | up   | 11.93 | 3.58  | 4.13E-02 |
| hsa-miR-30d-3p              | CTTTCAGTCAGATGTTTGCTGC  | down | 0.54  | -0.90 | 4.14E-02 |
| ppy-mir-1268-p3_1ss8TC      | AGCTACTCGGGAGGCTGA      | down | -inf  | -inf  | 4.15E-02 |
| mmu-miR-6238_L-1R-2_1ss12TC | TATTAGTCAGCGGAGGAAA     | down | -inf  | -inf  | 4.17E-02 |
| hsa-miR-941                 | CACCCGGCTGTGTGCACATGTGC | up   | 2.59  | 1.37  | 4.18E-02 |
| hsa-miR-147b-3p             | GTGTGCGGAAATGCTTCTGCT   | down | -inf  | -inf  | 4.20E-02 |
| hsa-miR-6502-5p             | AGCTCTAGAAAGATTGTTGACC  | down | -inf  | -inf  | 4.21E-02 |
| hsa-miR-6770-3p_L+1R-1      | CCTGGCGGCTGTGTCTTCACA   | down | -inf  | -inf  | 4.24E-02 |
| hsa-miR-552-3p              | AACAGGTGACTGGTTAGACAA   | down | -inf  | -inf  | 4.24E-02 |
| hsa-miR-125b-5p_R-2         | TCCCTGAGACCCTAACTTGT    | up   | 2.36  | 1.24  | 4.27E-02 |
| hsa-miR-4685-3p_R-2         | TCTCCCTTCCTGCCCTGGCT    | up   | 16.78 | 4.07  | 4.31E-02 |
| mmu-miR-3964_L+1_1ss6GA     | CATAAAGTAGAAAGCACTAAA   | down | -inf  | -inf  | 4.33E-02 |
| hsa-miR-181b-3p             | CTCACTGAACAATGAATGCAA   | down | 0.31  | -1.71 | 4.34E-02 |
| hsa-miR-3960_L-2_1ss12AC    | CGGCGGCGGCGGCGGGGG      | up   | 17.32 | 4.11  | 4.38E-02 |
| hsa-miR-4761-3p_R-1         | GAGGGCATGCGCACTTTGTC    | down | -inf  | -inf  | 4.48E-02 |
| hsa-miR-942-3p              | CACATGGCCGAAACAGAGAAGT  | down | 0.23  | -2.14 | 4.50E-02 |
| PC-3p-137989_71             | TTTTATAATATGGACCCTTCTGT | down | 0.12  | -3.11 | 4.50E-02 |
| hsa-miR-3165                | AGGTGGATGCAATGTGACCTCA  | down | -inf  | -inf  | 4.52E-02 |
| hsa-miR-548ar-3p_R-1        | TAAAACTGCAGTTATTTTTG    | down | -inf  | -inf  | 4.54E-02 |
| mmu-mir-6236-p5_1ss4CG_1    | AATGAACTAGCCCTGAAA      | up   | 26.12 | 4.71  | 4.56E-02 |
| mmu-mir-6236-p5_1ss4CG_3    | AATGAACTAGCCCTGAAAATGG  | up   | 26.12 | 4.71  | 4.56E-02 |
| mmu-mir-6236-p5_1ss4CG_2    | AATGAACTAGCCCTGAAAA     | up   | 26.12 | 4.71  | 4.56E-02 |

|                            |                        |      |       |       |          |
|----------------------------|------------------------|------|-------|-------|----------|
| hsa-mir-548aw-p3_1ss22TC   | AAAACCGCGATGACTTTTGCAC | down | -inf  | -inf  | 4.56E-02 |
| PC-5p-196353_48            | AAAGGTAATTGAGGTCTTTGA  | down | -inf  | -inf  | 4.57E-02 |
| mmu-miR-5119_L+1R-2        | TCATCTCATCCTGGGGCT     | up   | 3.68  | 1.88  | 4.66E-02 |
| PC-3p-10362_1335           | CAGCCCGAAGTGTGACCCA    | up   | 44.62 | 5.48  | 4.68E-02 |
| hsa-miR-1537-3p            | AAAACCGTCTAGTTACAGTTGT | down | -inf  | -inf  | 4.68E-02 |
| hsa-miR-891a-5p            | TGCAACGAACCTGAGCCACTGA | down | -inf  | -inf  | 4.68E-02 |
| mmu-miR-30f_L+1R-1_1ss17AG | TGTAAACATCCGACTGGAAGCT | down | 0.16  | -2.65 | 4.77E-02 |
| hsa-miR-4524a-3p           | TGAGACAGGCTTATGCTGCTAT | down | -inf  | -inf  | 4.79E-02 |
| PC-3p-59915_206            | TTGAGGGGAGAAATGCTGTGT  | down | 0.28  | -1.82 | 4.82E-02 |
| hsa-miR-192-5p             | CTGACCTATGAATTGACAGCC  | up   | 4.42  | 2.15  | 4.82E-02 |
| hsa-miR-369-5p_R-1         | AGATCGACCGTGTTATATTCG  | down | 0.26  | -1.97 | 4.86E-02 |
| hsa-miR-134-5p             | TGTGACTGGTTGACCAGAGGGG | down | 0.45  | -1.16 | 4.87E-02 |
| PC-3p-114333_89            | TACTGGGATATTTGGAGCTTCT | down | 0.20  | -2.31 | 4.93E-02 |
| hsa-miR-183-5p_L-1         | ATGGCACTGGTAGAATTCACT  | up   | 3.63  | 1.86  | 4.93E-02 |
| PC-5p-142741_68            | GAGAAAGCTCACAGGAACT    | down | -inf  | -inf  | 4.99E-02 |

---

**Supplementary Material 3. Differentially expressed miRNAs between non-smoking IA and healthy controls.**

| miR name                    | miR sequence            | up/down | Fold change | log2(fold_change) | P value  |
|-----------------------------|-------------------------|---------|-------------|-------------------|----------|
| mmu-miR-146a-5p_R+1         | TGAGAACTGAATTCATGGGTTT  | up      | 3.29        | 1.72              | 3.00E-09 |
| hsa-miR-107_R-2             | AGCAGCATTGTACAGGGCTAT   | down    | 0.33        | -1.59             | 2.35E-08 |
| hsa-miR-195-5p_R+1          | TAGCAGCACAGAAATATTGGCA  | down    | 0.27        | -1.89             | 5.07E-08 |
| hsa-miR-584-5p_R-1          | TTATGGTTTGCCTGGGACTGA   | up      | 3.03        | 1.60              | 7.97E-08 |
| hsa-mir-8086-p3_1ss11AG     | AGGCTGGAGTGCAGTGGC      | down    | 0.02        | -5.43             | 1.05E-07 |
| hsa-mir-1304-p5             | CGGTTTGAGGCTACAGTGAGAT  | down    | 0.27        | -1.90             | 1.47E-07 |
| hsa-miR-191-5p              | CAACGGAATCCCAAAGCAGCTG  | up      | 2.27        | 1.18              | 1.83E-07 |
| hsa-miR-92b-5p_R-2          | AGGGACGGGACGCGGTGCAG    | down    | 0.25        | -2.02             | 2.11E-07 |
| hsa-miR-2110_R+1            | TTGGGGAAACGGCCGCTGAGTGA | down    | 0.25        | -1.98             | 2.83E-07 |
| hsa-miR-3605-3p_R-2         | CCTCCGTGTTACCTGTCCTCT   | down    | 0.14        | -2.81             | 3.32E-07 |
| hsa-miR-95-3p_R-1           | TTCAACGGGTATTTATTGAGC   | down    | 0.02        | -5.91             | 5.27E-07 |
| hsa-miR-511-5p              | GTGTCTTTTGCTCTGCAGTCA   | down    | 0.04        | -4.65             | 5.34E-07 |
| hsa-miR-3140-3p_R-1         | AGCTTTTGGGAATTCAGGTAG   | down    | 0.13        | -2.96             | 7.01E-07 |
| hsa-miR-320a-3p             | AAAAGCTGGGTTGAGAGGGCGA  | down    | 0.33        | -1.59             | 7.18E-07 |
| hsa-miR-331-5p_R-2          | CTAGGTATGGTCCCAGGGAT    | down    | 0.30        | -1.72             | 7.33E-07 |
| hsa-miR-28-3p               | CACTAGATTGTGAGCTCCTGGA  | up      | 2.70        | 1.43              | 7.63E-07 |
| PC-5p-42143_323             | TTAGTGGCTCCCTCTGCCTGCA  | down    | 0.15        | -2.78             | 8.21E-07 |
| hsa-miR-1285-3p_R-2         | TCTGGGCAACAAAGTGAGAC    | down    | 0.08        | -3.56             | 8.23E-07 |
| hsa-miR-363-3p_R-1          | AATTGCACGGTATCCATCTGT   | down    | 0.07        | -3.79             | 9.21E-07 |
| hsa-miR-146a-5p             | TGAGAACTGAATTCATGGGTT   | up      | 2.56        | 1.36              | 9.40E-07 |
| oga-miR-100_R+1             | AACCCGTAGATCCGAACTTGTGA | down    | 0.10        | -3.36             | 1.13E-06 |
| hsa-miR-320e_L+1R+3_1ss17AG | AAAAGCTGGGTTGAGAGGGTGA  | down    | 0.06        | -4.00             | 1.33E-06 |



|                                |                         |      |      |       |          |
|--------------------------------|-------------------------|------|------|-------|----------|
| hsa-miR-1180-3p_R-2            | TTTCCGGCTCGCGTGGGTGT    | down | 0.06 | -4.09 | 1.59E-06 |
| hsa-miR-550a-3-5p              | AGTGCCTGAGGGAGTAAGAG    | down | 0.09 | -3.42 | 1.62E-06 |
| hsa-miR-190b-5p                | TGATATGTTTGATATTGGGTTG  | down | 0.14 | -2.85 | 1.73E-06 |
| ocu-miR-502b-3p_R-3            | AATGCACCTGGGCAAGGATTT   | down | -inf | -inf  | 1.77E-06 |
| hsa-miR-6815-5p_R-2            | TAGGTGGCGCCGGAGGAGTCA   | down | 0.00 | -8.71 | 1.86E-06 |
| hsa-miR-423-3p                 | AGCTCGGTCTGAGGCCCTCAGT  | up   | 2.39 | 1.26  | 1.90E-06 |
| PC-3p-2703_5627                | TTTGGGGATTCTAAGAGGAAG   | down | 0.01 | -7.36 | 2.15E-06 |
| hsa-miR-1976_R+2               | CCTCCTGCCCTCCTTGCTGTAG  | down | 0.20 | -2.31 | 2.52E-06 |
| hsa-mir-4472-2-p3_1ss11CT      | AGTCTTGCTCTGTGCCCCAGG   | down | -inf | -inf  | 2.53E-06 |
| hsa-miR-576-3p_R-1             | AAGATGTGGAAAAATTGGAAT   | down | 0.16 | -2.66 | 2.56E-06 |
| hsa-miR-500a-3p_L+1R-1_1ss22TA | AATGCACCTGGGCAAGGATTCA  | down | 0.12 | -3.09 | 2.65E-06 |
| hsa-miR-502-3p                 | AATGCACCTGGGCAAGGATTCA  | down | 0.12 | -3.09 | 2.65E-06 |
| hsa-let-7c-5p_R-4              | TGAGGTAGTAGGTTGTAT      | down | 0.40 | -1.33 | 2.94E-06 |
| hsa-miR-16-2-3p_L+1R-2         | ACCAATATTACTGTGCTGCTT   | down | 0.07 | -3.93 | 3.27E-06 |
| hsa-miR-26a-5p                 | TTCAAGTAATCCAGGATAGGCT  | up   | 2.80 | 1.48  | 3.47E-06 |
| hsa-miR-7706_R-1               | TGAAGCGCCTGTGCTCTGCCGAG | down | 0.18 | -2.47 | 3.54E-06 |
| hsa-miR-25-3p                  | CATTGCACTTGTCTCGGTCTGA  | down | 0.14 | -2.83 | 4.27E-06 |
| hsa-miR-424-3p                 | CAAAACGTGAGGCGCTGCTAT   | down | 0.30 | -1.73 | 4.38E-06 |
| hsa-miR-4732-3p                | GCCCTGACCTGTCCCTGTTCTG  | down | 0.12 | -3.04 | 5.11E-06 |
| PC-3p-15389_938                | CTTTGGGGATTCTAAGAGTT    | down | 0.01 | -6.42 | 5.23E-06 |
| PC-5p-15389_938                | CTTTGGGGATTCTAAGAGTT    | down | 0.01 | -6.42 | 5.23E-06 |
| hsa-miR-92a-3p                 | TATTGCACTTGTCCCGGCCTGT  | down | 0.25 | -1.99 | 5.24E-06 |
| mmu-miR-92a-3p_R+1             | TATTGCACTTGTCCCGGCCTGA  | down | 0.09 | -3.47 | 5.33E-06 |
| hsa-miR-4732-5p                | TGTAGAGCAGGGAGCAGGAAGCT | down | 0.03 | -5.27 | 6.09E-06 |
| hsa-miR-501-3p                 | AATGCACCCGGGCAAGGATTCT  | down | 0.11 | -3.22 | 6.14E-06 |

|                          |                           |      |      |       |          |
|--------------------------|---------------------------|------|------|-------|----------|
| hsa-miR-10b-5p_R-1       | TACCCTGTAGAACCGAATTTGT    | down | 0.04 | -4.75 | 6.90E-06 |
| hsa-miR-199b-5p_R-1      | CCCAGTGTTTAGACTATCTGTT    | down | 0.25 | -1.99 | 7.17E-06 |
| hsa-miR-532-5p           | CATGCCTTGAGTGTAGGACCGT    | down | 0.19 | -2.38 | 7.26E-06 |
| hsa-miR-660-5p_R+1       | TACCCATTCATATCGGAGTTGT    | down | 0.13 | -2.99 | 7.57E-06 |
| hsa-miR-18b-5p_R-3       | TAAGGTGCATCTAGTGCAGT      | down | 0.17 | -2.54 | 7.81E-06 |
| hsa-miR-151a-3p          | CTAGACTGAAGCTCCTTGAGG     | up   | 2.56 | 1.36  | 8.00E-06 |
| hsa-miR-16-5p            | TAGCAGCACGTAATATTGGCG     | down | 0.13 | -2.94 | 8.15E-06 |
| hsa-miR-3200-3p_R-1      | CACCTTGCGCTACTCAGGTCT     | down | 0.01 | -6.74 | 9.44E-06 |
| hsa-let-7i-5p            | TGAGGTAGTAGTTTGTGCTGTT    | down | 0.36 | -1.49 | 9.59E-06 |
| hsa-miR-4772-3p          | CCTGCAACTTTGCCTGATCAGA    | down | 0.01 | -7.42 | 1.00E-05 |
| hsa-miR-30c-2-3p         | CTGGGAGAAGGCTGTTTACTCT    | down | 0.25 | -2.02 | 1.07E-05 |
| hsa-miR-342-5p           | AGGGGTGCTATCTGTGATTGA     | down | 0.13 | -2.94 | 1.07E-05 |
| hsa-miR-451a_R-1         | AAACCGTTACCATTACTGAGT     | down | 0.02 | -5.33 | 1.08E-05 |
| hsa-miR-486-5p           | TCCTGTACTGAGCTGCCCGAG     | down | 0.07 | -3.83 | 1.09E-05 |
| hsa-miR-140-3p_R+1       | TACCACAGGGTAGAACCACGGA    | down | 0.20 | -2.30 | 1.21E-05 |
| hsa-miR-151a-5p          | TCGAGGAGCTCACAGTCTAGT     | up   | 2.82 | 1.49  | 1.24E-05 |
| hsa-miR-7-5p_R-1         | TGGAAGACTAGTGATTTTGTGTTGT | down | 0.23 | -2.10 | 1.30E-05 |
| hsa-miR-150-3p_R-2       | CTGGTACAGGCCTGGGGGAC      | down | 0.03 | -4.84 | 1.35E-05 |
| hsa-miR-942-5p_L-2R+1    | TTCTCTGTTTTGGCCATGTGT     | down | 0.36 | -1.49 | 1.39E-05 |
| bta-mir-2887-1-p5_1ss5CA | GGGAAACGGGGCGCGGCC        | down | 0.06 | -4.06 | 1.42E-05 |
| mmu-let-7j_R-2           | TGAGGTATTAGTTTGTGCTGTT    | down | 0.26 | -1.93 | 1.60E-05 |
| hsa-miR-4667-5p_R-2      | ACTGGGAGCAGAAGGAGAA       | down | 0.13 | -2.97 | 1.61E-05 |
| hsa-miR-106b-3p_R-2      | CCGCACTGTGGGTACTTGCT      | down | 0.27 | -1.89 | 1.61E-05 |
| hsa-miR-3960_L-2_1ss12AC | CGGCGGCGGCGGCGGGG         | down | 0.03 | -5.29 | 1.62E-05 |
| hsa-miR-214-3p_R-1       | ACAGCAGGCACAGACAGGCAG     | down | 0.01 | -6.15 | 1.67E-05 |
| hsa-miR-31-5p_R-2        | AGGCAAGATGCTGGCATAG       | down | 0.01 | -6.94 | 1.71E-05 |

|                             |                         |      |      |       |          |
|-----------------------------|-------------------------|------|------|-------|----------|
| hsa-miR-27a-5p              | AGGGCTTAGCTGCTTGTGAGCA  | down | 0.20 | -2.31 | 1.94E-05 |
| hsa-mir-451a-p3             | TTTAGTAATGGTAATGGTTCT   | down | 0.02 | -5.71 | 2.00E-05 |
| hsa-miR-11400_1ss20TC       | TCCGCTGTGTATCTCTGTGCC   | up   | 6.47 | 2.69  | 2.01E-05 |
| mmu-miR-2137_L-1R-1_1ss16AG | CCGGCGGGAGCCCCGGGGA     | down | -inf | -inf  | 2.03E-05 |
| hsa-miR-144-3p_R-1          | TACAGTATAGATGATGTAC     | down | 0.03 | -4.99 | 2.18E-05 |
| hsa-miR-3909                | TGTCCTCTAGGGCCTGCAGTCT  | down | 0.05 | -4.29 | 2.29E-05 |
| hsa-miR-942-3p              | CACATGGCCGAAACAGAGAAGT  | down | 0.12 | -3.02 | 2.30E-05 |
| PC-3p-39847_345             | ACATATAAGTGAATTCTGGGATT | down | 0.02 | -5.40 | 2.33E-05 |
| hsa-miR-29c-3p_R-1          | TAGCACCATTTGAAATCGGTT   | down | 0.15 | -2.77 | 2.38E-05 |
| hsa-let-7i-3p_R-1           | CTGCGCAAGCTACTGCCTTGC   | down | 0.06 | -4.07 | 2.46E-05 |
| hsa-miR-20b-3p_R-3          | ACTGTAGTATGGGCACTTC     | down | 0.02 | -5.80 | 2.60E-05 |
| hsa-miR-744-5p_R-1          | TGCGGGGCTAGGGCTAACAGC   | up   | 3.59 | 1.85  | 2.67E-05 |
| hsa-miR-4772-5p             | TGATCAGGCCAAAATTGCAGACT | down | 0.01 | -6.60 | 2.70E-05 |
| hsa-miR-582-5p_R-1          | TTACAGTTGTTCAACCAGTTAC  | down | 0.01 | -7.61 | 2.79E-05 |
| hsa-miR-15b-5p              | TAGCAGCACATCATGGTTTACA  | down | 0.33 | -1.60 | 2.92E-05 |
| hsa-miR-642a-3p_R-1         | AGACACATTTGGAGAGGGGAAC  | down | 0.00 | -7.99 | 3.12E-05 |
| hsa-miR-27a-3p              | TTCACAGTGGCTAAGTTCCGC   | down | 0.54 | -0.88 | 3.27E-05 |
| hsa-miR-425-5p              | AATGACACGATCACTCCCGTTGA | down | 0.39 | -1.34 | 3.31E-05 |
| hsa-mir-619-p5_1ss3AG       | AAGTGCTGGGATTACAGG      | down | 0.04 | -4.83 | 3.33E-05 |
| hsa-miR-34c-5p              | AGGCAGTGTAGTTAGCTGATTGC | down | 0.10 | -3.37 | 3.34E-05 |
| hsa-miR-576-5p              | ATTCTAATTTCTCCACGTCTTT  | down | 0.23 | -2.13 | 3.49E-05 |
| mmu-miR-2137_L-2_1ss16AG    | CGGCGGGAGCCCCGGGAG      | down | 0.14 | -2.88 | 3.51E-05 |
| hsa-miR-10a-5p_R-1          | TACCCTGTAGATCCGAATTTGT  | down | 0.25 | -2.00 | 3.58E-05 |
| hsa-miR-3143_R-4            | ATAACATTGTAAAGCGCTTCT   | down | 0.08 | -3.58 | 3.59E-05 |

|                            |                          |      |      |       |          |
|----------------------------|--------------------------|------|------|-------|----------|
| bta-miR-1246_L+1R-1        | AAATGGATTTTTGGAGCAG      | down | -inf | -inf  | 3.63E-05 |
| hsa-miR-5481_R-1           | AAAAGTATTTGCGGGTTTTGT    | down | 0.40 | -1.31 | 3.66E-05 |
| hsa-miR-199a-5p            | CCCAGTGTTACAGACTACCTGTTC | up   | 3.83 | 1.94  | 3.78E-05 |
| hsa-miR-4755-5p            | TTTCCCTTCAGAGCCTGGCTTT   | down | 0.12 | -3.10 | 3.93E-05 |
| hsa-miR-196a-5p_R-1        | TAGGTAGTTTCATGTTGTTGG    | down | 0.05 | -4.42 | 4.06E-05 |
| hsa-miR-195-3p_R-1         | CCAATATTGGCTGTGCTGCTC    | down | 0.03 | -4.95 | 4.23E-05 |
| pal-mir-9993a-p3_1ss2GA    | AAATCTCGGTGGGACCTC       | down | -inf | -inf  | 4.33E-05 |
| hsa-miR-106a-3p_L+2R-3     | TACTGCAATGTAAGCACTTCT    | down | 0.15 | -2.71 | 4.47E-05 |
| hsa-miR-3615_R+1           | TCTCTCGGCTCCTCGCGGCTCG   | down | 0.23 | -2.12 | 4.58E-05 |
| hsa-miR-4508_L+2R-1        | AAGCGGGGCTGGGCGCGC       | down | 0.04 | -4.59 | 4.66E-05 |
| hsa-miR-188-5p_R+1         | CATCCCTTGCATGGTGGAGGGT   | down | 0.04 | -4.81 | 4.69E-05 |
| hsa-miR-29b-3p_R-3         | TAGCACCATTTGAAATCAGT     | down | 0.14 | -2.86 | 4.83E-05 |
| hsa-miR-424-5p_R-1         | CAGCAGCAATTCATGTTTTGA    | down | 0.28 | -1.84 | 5.05E-05 |
| hsa-miR-532-3p_R-1         | CCTCCCACACCCAAGGCTTGC    | down | 0.25 | -2.00 | 5.41E-05 |
| hsa-miR-548h-3p_R-1_1ss4AG | CAAGAACCGCAATTACTTTTTGC  | down | 0.18 | -2.46 | 5.47E-05 |
| PC-5p-30483_473            | TAGGGGTGAAAGGCTAAACA     | down | 0.10 | -3.33 | 5.83E-05 |
| hsa-miR-1273c_R-1          | GCGGACAAAACGAGACCCTGT    | down | 0.34 | -1.54 | 6.00E-05 |
| hsa-miR-203a-3p_R-2        | GTGAAATGTTTAGGACCACT     | down | 0.06 | -4.02 | 6.29E-05 |
| hsa-miR-3934-5p            | TCAGGTGTGGAAACTGAGGCAG   | down | 0.02 | -5.44 | 6.43E-05 |
| hsa-miR-610                | TGAGCTAAATGTGTGCTGGGA    | down | 0.08 | -3.71 | 6.52E-05 |
| hsa-miR-106b-5p_R-1        | TAAAGTGCTGACAGTGCAGA     | down | 0.41 | -1.30 | 6.58E-05 |
| hsa-miR-142-5p_L+2R-3      | CCCATAAAGTAGAAAGCACT     | down | 0.31 | -1.69 | 6.62E-05 |
| PC-5p-49096_267            | AGCCTGGAAGCTGGAGCCTGCAG  | down | 0.41 | -1.28 | 6.65E-05 |
| hsa-miR-6805-5p            | TAGGGGGCGGCTTGTGGAGTGT   | down | 0.02 | -5.88 | 6.88E-05 |
| bta-miR-2478_1ss2TA        | GAATCCCCTTCTGACACCA      | down | 0.13 | -2.97 | 7.11E-05 |

|                            |                        |      |      |       |          |
|----------------------------|------------------------|------|------|-------|----------|
| hsa-miR-185-5p             | TGGAGAGAAAGGCAGTTCCTGA | down | 0.28 | -1.86 | 7.15E-05 |
| hsa-miR-548ak_L-1_1ss9CT   | AAAGTAATTGCGGTTTTTGA   | down | 0.04 | -4.53 | 7.55E-05 |
| hsa-miR-15a-5p_R-1         | TAGCAGCACATAATGGTTTTGT | down | 0.33 | -1.61 | 7.62E-05 |
| hsa-miR-5010-5p            | AGGGGGATGGCAGAGCAAATT  | down | 0.29 | -1.81 | 7.86E-05 |
| hsa-miR-6852-5p            | CCCTGGGGTTCTGAGGACATG  | up   | 5.25 | 2.39  | 8.64E-05 |
| hsa-miR-624-5p_R-1         | TAGTACCAGTACCTTGTGTTT  | down | 0.12 | -3.05 | 8.83E-05 |
| hsa-miR-183-5p_L-1         | ATGGCACTGGTAGAATTCCT   | down | 0.04 | -4.52 | 8.88E-05 |
| hsa-miR-150-5p             | TCTCCCAACCCTTGTACCAGTG | down | 0.07 | -3.75 | 9.12E-05 |
| hsa-miR-15b-3p_R-1         | CGAATCATTATTTGCTGCTCT  | down | 0.31 | -1.70 | 9.31E-05 |
| mmr-miR-1839_L+1R-1        | AAGGTAGATAGAACAGGTCTTG | down | 0.53 | -0.91 | 9.37E-05 |
| hsa-miR-30a-3p_R-1         | CTTTCAGTCGGATGTTTGAG   | down | 0.29 | -1.78 | 9.55E-05 |
| bta-miR-1246_L+1R-2        | AAATGGATTTTTGGAGCA     | down | 0.01 | -7.40 | 9.56E-05 |
| hsa-miR-3688-3p_R-2        | TATGGAAAGACTTTGCCACT   | down | 0.04 | -4.74 | 9.82E-05 |
| hsa-miR-4448_R-2_1ss6CG    | GGCTCGTTGGTCTAGGGG     | down | 0.11 | -3.20 | 1.08E-04 |
| hsa-miR-615-3p_R-1         | TCCGAGCCTGGGTCTCCCTCT  | down | 0.03 | -5.03 | 1.09E-04 |
| hsa-miR-503-5p_R-2_1ss21CA | TAGCAGCGGGAACAGTTCTGA  | down | 0.33 | -1.60 | 1.13E-04 |
| PC-3p-101409_103           | AAACAGGATAGGCACTAAATGG | down | -inf | -inf  | 1.17E-04 |
| pal-miR-9993a-3p_L+1R-1    | AATCTCGGTGGGACCTCC     | down | 0.24 | -2.04 | 1.19E-04 |
| hsa-miR-218-5p_R-1         | TTGTGCTTGATCTAACCATG   | down | -inf | -inf  | 1.19E-04 |
| hsa-miR-371b-5p            | ACTCAAAGATGGCGGCACTTT  | down | 0.01 | -6.32 | 1.37E-04 |
| hsa-miR-32-5p_R-2          | TATTGCACATTACTAAGTTG   | down | 0.25 | -2.00 | 1.39E-04 |
| hsa-miR-182-5p_R-4         | TTTGGCAATGGTAGAACTCA   | down | 0.06 | -4.08 | 1.42E-04 |
| hsa-miR-636_R-1            | TGTGCTTGCTCGTCCCGCCCGC | down | 0.02 | -5.45 | 1.50E-04 |
| hsa-miR-1294_R-2           | TGTGAGGTTGGCATTGTTGT   | down | 0.09 | -3.50 | 1.56E-04 |
| hsa-let-7b-5p              | TGAGGTAGTAGGTTGTGTGGTT | down | 0.23 | -2.11 | 1.59E-04 |

|                             |                           |      |      |       |          |
|-----------------------------|---------------------------|------|------|-------|----------|
| hsa-miR-4488_L+2R-1         | GGAGGGGGCGGGCTCCGGC       | down | -inf | -inf  | 1.59E-04 |
| hsa-miR-589-5p_R-1          | TGAGAACCACGTCTGCTCTGA     | down | 0.42 | -1.26 | 1.60E-04 |
| mmu-miR-3535                | TGGATATGATGACTGATTACCTGAG | down | 0.11 | -3.19 | 1.61E-04 |
| A                           |                           |      |      |       |          |
| hsa-miR-15a-3p_1ss22AT      | CAGGCCATATTGTGCTGCCTCT    | down | 0.08 | -3.68 | 1.70E-04 |
| hsa-miR-214-5p_1ss22CA      | TGCCTGTCTACACTTGCTGTGA    | down | -inf | -inf  | 1.71E-04 |
| bta-miR-11987_L-2R-1_1ss8TA | AGGAAACTCTGGTGGAGG        | down | 0.02 | -5.39 | 1.73E-04 |
| hsa-miR-151b_R+2            | TCGAGGAGCTCACAGTCTAG      | down | 0.36 | -1.49 | 1.76E-04 |
| PC-3p-81170_138             | TGGCAAGGGCTGTGAAGAGA      | down | 0.07 | -3.84 | 1.81E-04 |
| hsa-miR-3150b-3p            | TGAGGAGATCGTCGAGGTTGG     | down | 0.01 | -6.59 | 1.94E-04 |
| hsa-miR-1323                | TCAAAACTGAGGGCATTCTTCT    | down | 0.04 | -4.69 | 1.95E-04 |
| hsa-miR-29a-3p_R-1          | TAGCACCATCTGAAATCGGTT     | down | 0.15 | -2.73 | 2.03E-04 |
| hsa-mir-3665-p5_1ss2CA      | GAGGGCGGCGGCGGCGGC        | down | -inf | -inf  | 2.06E-04 |
| hsa-miR-182-3p_R-1          | TGGTTCTAGACTTGCCAACT      | down | 0.05 | -4.33 | 2.14E-04 |
| hsa-miR-486-3p              | CGGGCAGCTCAGTACAGGAT      | down | 0.18 | -2.48 | 2.19E-04 |
| PC-5p-37928_367             | TGAGGGGAGAGAGCGAGACT      | down | 0.01 | -6.24 | 2.26E-04 |
| hsa-miR-4446-3p             | CAGGGCTGGCAGTGACATGGGT    | up   | 7.17 | 2.84  | 2.34E-04 |
| hsa-miR-3164                | TGTGACTTTAAGGGAAATGGCG    | down | 0.21 | -2.24 | 2.39E-04 |
| hsa-miR-548ac_L-1           | AAAAACCGGCAATTACTTTTG     | down | -inf | -inf  | 2.44E-04 |
| hsa-miR-3944-5p             | TGTGCAGCAGGCCAACCGAGA     | down | 0.03 | -5.22 | 2.44E-04 |
| mmu-miR-3964_L+1_1ss6GA     | CATAAAGTAGAAAGCACTAAA     | down | 0.06 | -4.15 | 2.51E-04 |
| hsa-miR-216a-5p             | TAATCTCAGCTGGCAACTGTGA    | down | -inf | -inf  | 2.52E-04 |
| hsa-miR-197-5p_R-2          | CGGGTAGAGAGGGCAGTGGGA     | down | 0.21 | -2.25 | 2.55E-04 |
| hsa-mir-937-p3              | CCCATCCGCGCTCTGACTCT      | down | 0.04 | -4.62 | 2.58E-04 |
| hsa-miR-1250-5p             | ACGGTGCTGGATGTGGCCTTT     | up   | 5.76 | 2.53  | 2.61E-04 |

|                             |                         |      |      |       |          |
|-----------------------------|-------------------------|------|------|-------|----------|
| hsa-miR-579-3p              | TTCATTTGGTATAAACCGCGATT | down | 0.20 | -2.35 | 2.66E-04 |
| hsa-miR-199a-3p             | ACAGTAGTCTGCACATTGGTTA  | up   | 3.82 | 1.93  | 2.68E-04 |
| hsa-miR-550a-5p_R-2         | AGTGCCTGAGGGAGTAAGAGC   | down | 0.09 | -3.41 | 2.71E-04 |
| hsa-miR-450b-5p_R-1         | TTTTGCAATATGTTCCCTGAAT  | down | 0.17 | -2.58 | 2.72E-04 |
| hsa-miR-5001-3p_R-1         | TTCTGCCTCTGTCCAGGTCCT   | down | 0.03 | -4.89 | 2.74E-04 |
| mmu-miR-6238_L-1R-2_1ss12TC | TATTAGTCAGCGGAGGAAA     | down | 0.18 | -2.44 | 2.80E-04 |
| hsa-miR-1307-3p_R+1         | ACTCGGCGTGGCGTCGGTCGTGG | up   | 3.53 | 1.82  | 2.83E-04 |
| bta-miR-1246_L+1R+3         | AAATGGATTTTTGGAGCAGGGAG | down | 0.02 | -6.00 | 2.85E-04 |
| hsa-miR-18a-3p_1ss23GA      | ACTGCCCTAAGTGCTCCTTCTGA | down | 0.30 | -1.76 | 2.91E-04 |
| hsa-miR-1246_L-2R+1         | TGGATTTTTGGAGCAGGG      | down | 0.05 | -4.40 | 2.95E-04 |
| hsa-miR-22-3p               | AAGCTGCCAGTTGAAGAACTGT  | down | 0.29 | -1.78 | 2.99E-04 |
| hsa-miR-1290_1ss13TG        | TGGATTTTTGGAGCAGGGA     | down | 0.03 | -5.23 | 3.09E-04 |
| hsa-miR-96-5p_R-2           | TTTGGCACTAGCACATTTTTTG  | down | 0.02 | -5.39 | 3.15E-04 |
| PC-3p-8050_1668             | GAAAAGTTAGGGGATGAGC     | down | 0.11 | -3.21 | 3.22E-04 |
| mmu-miR-5100_R-1            | TCGAATCCCAGCGGTGCCTC    | down | 0.02 | -5.56 | 3.29E-04 |
| bta-miR-11987_L-2_1ss8TA    | AGGAAACTCTGGTGGAGGT     | down | 0.00 | -8.55 | 3.34E-04 |
| hsa-miR-125a-3p_R-1         | ACAGGTGAGGTTCTTGGGAGC   | down | 0.23 | -2.11 | 3.37E-04 |
| hsa-miR-3940-3p_R-1         | CAGCCCGGATCCCAGCCCACT   | down | 0.18 | -2.49 | 3.39E-04 |
| hsa-miR-142-3p_R-1          | TGTAGTGTTTCCCTACTTTATGG | up   | 4.98 | 2.32  | 3.51E-04 |
| hsa-miR-132-5p              | ACCGTGGCTTTCGATTGTTACT  | down | 0.30 | -1.74 | 3.64E-04 |
| hsa-miR-4659a-3p            | TTTCTTCTTAGACATGGCAACG  | down | 0.17 | -2.59 | 3.66E-04 |
| hsa-miR-205-5p_R-1          | TCCTTCATTCCACCGGAGTCT   | down | 0.01 | -7.34 | 3.67E-04 |
| hsa-miR-7976_R+1            | TGCCCTGAGACTTTTGCTCT    | down | 0.09 | -3.55 | 3.68E-04 |
| rno-miR-1843b-3p_R+1        | TCTGATCGTTCCCCTCCATACA  | up   | 7.51 | 2.91  | 3.72E-04 |
| hsa-miR-30e-3p_1ss22CT      | CTTTCAGTCGGATGTTTACAGT  | up   | 2.56 | 1.36  | 3.77E-04 |

|                             |                           |      |      |       |          |
|-----------------------------|---------------------------|------|------|-------|----------|
| PC-5p-16110_898             | ATGGGGTGCAAGCTCTTGA       | down | 0.16 | -2.69 | 3.86E-04 |
| hsa-miR-183-3p_L-1          | TGAATTACCGAAGGGCCATAA     | down | 0.01 | -6.53 | 3.92E-04 |
| hsa-miR-186-5p              | CAAAGAATTCTCCTTTTGGGCT    | down | 0.57 | -0.82 | 3.93E-04 |
| hsa-miR-6780a-5p_L-1R+2     | TGGGAGGGAAGACAGCTGGAGAGT  | down | 0.17 | -2.58 | 3.94E-04 |
| hsa-miR-10b-3p_L-1          | CAGATTCGATTCTAGGGGAAT     | down | 0.01 | -7.09 | 4.14E-04 |
| hsa-miR-181d-5p_R+1         | AACATTCATTGTTGTTCGGTGGGTT | up   | 6.10 | 2.61  | 4.17E-04 |
| bta-miR-2478_L-1R-1_1ss2TA  | AATCCCACCTTCTGACACC       | down | 0.03 | -4.97 | 4.20E-04 |
| hsa-miR-4685-3p_R-2         | TCTCCCTTCCTGCCCTGGCT      | down | 0.11 | -3.22 | 4.22E-04 |
| hsa-miR-126-5p              | CATTATTACTTTTGGTACGCG     | up   | 1.75 | 0.81  | 4.24E-04 |
| hsa-miR-629-5p              | TGGGTTTACGTTGGGAGAACT     | down | 0.30 | -1.75 | 4.26E-04 |
| hsa-miR-374b-5p_R-1         | ATATAATACAACCTGCTAAGT     | up   | 3.50 | 1.81  | 4.27E-04 |
| bta-miR-11987_L-1R-2_1ss8TA | GAGGAAACTCTGGTGGAG        | down | 0.11 | -3.13 | 4.46E-04 |
| hsa-miR-200b-5p_R-1         | CATCTTACTGGGCAGCATTGG     | down | 0.06 | -4.09 | 4.50E-04 |
| hsa-miR-3202_L+2R-3         | TATGGAAGGGAGAAGAGCTTT     | down | -inf | -inf  | 4.66E-04 |
| hsa-miR-618_R-2             | AAACTCTACTTGTCCCTTCTGA    | down | 0.01 | -6.96 | 4.66E-04 |
| hsa-miR-30e-5p_R+2          | TGTAAACATCCTTGGACTGGAAGCT | down | 0.58 | -0.79 | 4.72E-04 |
| mmu-miR-5124a_L-1R-1_1ss5CA | GTCAAGTGACTAAGAGCA        | down | 0.13 | -2.90 | 4.75E-04 |
| hsa-miR-221-3p              | AGCTACATTGTCTGCTGGGTTTC   | up   | 3.84 | 1.94  | 5.02E-04 |
| hsa-mir-6511a-3-p5          | CTGCAGGCAGAAGTGGGGCTGA    | down | 0.08 | -3.57 | 5.02E-04 |
| hsa-mir-6511b-1-p5          | CTGCAGGCAGAAGTGGGGCTGA    | down | 0.08 | -3.57 | 5.02E-04 |
| hsa-let-7g-5p               | TGAGGTAGTAGTTTGTACAGTT    | down | 0.42 | -1.26 | 5.07E-04 |
| hsa-miR-3158-3p_R-1         | AAGGGCTTCCTCTCTGCAGGA     | down | 0.02 | -5.50 | 5.16E-04 |
| hsa-miR-20b-5p              | CAAAGTGCTCATAGTGCAGGTAG   | down | 0.31 | -1.67 | 5.40E-04 |



|                             |                           |      |       |       |          |
|-----------------------------|---------------------------|------|-------|-------|----------|
| hsa-miR-3130-3p             | GCTGCACCGGAGACTGGGTAA     | down | 0.10  | -3.26 | 5.44E-04 |
| hsa-let-7a-3p               | CTATACAATCTACTGTCTTTC     | down | 0.32  | -1.64 | 5.53E-04 |
| hsa-miR-3120-3p             | CACAGCAAGTGTAGACAGGCA     | up   | 5.52  | 2.47  | 5.55E-04 |
| hsa-miR-324-3p_L-3R+1       | ACTGCCCCAGGTGCTGCTGGA     | down | 0.44  | -1.20 | 5.57E-04 |
| hsa-miR-215-5p_R-1          | ATGACCTATGAATTGACAGA      | down | 0.01  | -6.35 | 5.60E-04 |
| hsa-mir-1285-1-p5_1ss12AG   | AGGCTGGTCTCGAACTCC        | down | 0.24  | -2.08 | 5.80E-04 |
| hsa-miR-330-3p              | GCAAAGCACACGGCCTGCAGAGA   | up   | 5.02  | 2.33  | 5.80E-04 |
| hsa-miR-9985_R-1_1ss16CT    | TTCACAGTGGCTAAGTTA        | down | 0.11  | -3.23 | 5.85E-04 |
| PC-5p-83623_132             | GGGCTAGTGACTGGAGTGAA      | down | 0.02  | -6.02 | 5.87E-04 |
| PC-5p-31521_454             | TTGCAAGCAACTCTGTGG        | down | 0.17  | -2.60 | 5.92E-04 |
| cja-miR-151_R+1             | TCGAGGAGCTCACAGTCTAGC     | up   | 11.79 | 3.56  | 6.03E-04 |
| hsa-miR-3127-5p             | ATCAGGGCTTGTGGAATGGGAAG   | down | 0.37  | -1.43 | 6.03E-04 |
| PC-5p-120168_84             | GGCAGAGAGGAGGAGAGAATTG    | down | -inf  | -inf  | 6.15E-04 |
| mml-miR-378d_L-1R+1_1ss21CG | CTGGACTTGGAGTCAGAAGGAG    | down | 0.02  | -5.72 | 6.34E-04 |
| hsa-miR-499a-5p             | TTAAGACTTGCAGTGATGTTT     | down | 0.32  | -1.66 | 6.44E-04 |
| PC-5p-18835_776             | GGTGGTTCTGTATGGAAG        | down | 0.19  | -2.39 | 6.52E-04 |
| hsa-miR-548at-5p_R-2        | AAAAGTTATTGCGGTTTTGG      | down | 0.11  | -3.16 | 6.54E-04 |
| hsa-miR-1301-3p_R+1         | TTGCAGCTGCCTGGGAGTGACTTCT | up   | 3.38  | 1.76  | 6.59E-04 |
| hsa-miR-3942-5p_L-1         | AGCAATACTGTTACCTGAAAT     | down | 0.23  | -2.14 | 6.72E-04 |
| bta-mir-2904-2-p5           | AGCCTCGGTTGGCCTCGGAT      | down | 0.27  | -1.87 | 6.97E-04 |
| hsa-miR-30a-5p_R+2          | TGTAAACATCCTCGACTGGAAGCT  | down | 0.18  | -2.47 | 7.01E-04 |
| eca-miR-451_R-2             | AAACCGTTACCATTACTGTG      | down | -inf  | -inf  | 7.05E-04 |
| PC-3p-10623_1306            | CAGTTCAATGGTGTTCAGCAGA    | up   | 7.40  | 2.89  | 7.07E-04 |
| hsa-mir-5695-p5             | TCTAGATTCTTCTTGGCCTCT     | down | -inf  | -inf  | 7.33E-04 |

|                             |                         |      |       |       |          |
|-----------------------------|-------------------------|------|-------|-------|----------|
| bta-miR-11987_L-1R-1_1ss8TA | GAGGAAACTCTGGTGGAGG     | down | 0.08  | -3.73 | 7.43E-04 |
| PC-5p-273115_36             | TGTGAGGAAGCTGTTGTTGCT   | down | -inf  | -inf  | 7.45E-04 |
| hsa-miR-548ag_R+1_1ss4GA    | AAAAGTAATTGTGGTTTCTGCC  | up   | 6.98  | 2.80  | 7.47E-04 |
| hsa-mir-3196-p5_1ss4GT      | GGGTCGGGGCGGCAGGGGCC    | down | 0.01  | -7.16 | 7.77E-04 |
| PC-5p-24850_590             | GGGCGTTGGATATTTGAA      | down | 0.07  | -3.90 | 7.89E-04 |
| bta-miR-2478_L-1            | TATCCCACTTCTGACACCA     | down | 0.15  | -2.73 | 8.10E-04 |
| hsa-miR-500b-3p_L+3R-1      | AGTGCACCCAGGCAAGGATTCT  | down | 0.10  | -3.34 | 8.16E-04 |
| hsa-miR-140-5p              | CAGTGGTTTTACCCTATGGTAG  | up   | 4.42  | 2.14  | 8.19E-04 |
| hsa-miR-28-5p_R-1           | AAGGAGCTCACAGTCTATTGA   | up   | 3.66  | 1.87  | 8.23E-04 |
| hsa-miR-409-3p              | GAATGTTGCTCGGTGAACCCCT  | up   | 4.10  | 2.04  | 8.24E-04 |
| hsa-miR-548q_L-1R+1         | CTGGTGCAAAAGTAATGGCGGT  | down | 0.04  | -4.55 | 8.38E-04 |
| PC-5p-37527_371             | GGGAGACAGACATCGGGT      | down | 0.04  | -4.82 | 8.41E-04 |
| pal-mir-10001-p5_1ss1AT     | TGGGCGGGCGGGGCCGGGGG    | down | 0.01  | -6.38 | 8.53E-04 |
| bta-miR-150_1ss10CT         | TCTCCCAACTCTTGTACCAGTGT | down | -inf  | -inf  | 8.55E-04 |
| hsa-miR-766-3p              | ACTCCAGCCCCACAGCCTCAGC  | up   | 10.36 | 3.37  | 8.65E-04 |
| hsa-miR-3157-3p             | CTGCCCTAGTCTAGCTGAAGCT  | down | 0.08  | -3.70 | 8.67E-04 |
| hsa-miR-363-5p              | CGGGTGGATCACGATGCAATTT  | down | 0.30  | -1.75 | 8.79E-04 |
| hsa-miR-1303_R-2            | TTAGAGACGGGTCTTGCT      | down | 0.05  | -4.35 | 8.94E-04 |
| hsa-miR-374a-3p             | CTTATCAGATTGTATTGTAATT  | up   | 2.71  | 1.44  | 9.05E-04 |
| hsa-miR-744-3p_R-1          | CTGTTGCCACTAACCTCAACC   | up   | 5.86  | 2.55  | 9.13E-04 |
| hsa-miR-3200-5p             | AATCTGAGAAGGCGCACAAAGGT | down | 0.02  | -5.98 | 9.14E-04 |
| PC-3p-83127_133             | CCAGGCTCTTGTTATGTTTT    | up   | inf   | inf   | 9.33E-04 |
| hsa-mir-5684-p3_1ss16CG     | TGCCCAGGCTGGAGTGCAG     | down | 0.01  | -6.40 | 9.38E-04 |
| hsa-miR-9-3p                | ATAAAGCTAGATAACCGAAAGT  | down | 0.21  | -2.23 | 9.44E-04 |
| hsa-miR-1234-3p_R+1         | TCGGCCTGACCACCCACCCCACT | down | 0.08  | -3.72 | 9.47E-04 |

|                               |                         |      |       |       |          |
|-------------------------------|-------------------------|------|-------|-------|----------|
| PC-3p-32854_434               | CAAAGGGTAACGGAGGAG      | down | 0.18  | -2.49 | 9.57E-04 |
| hsa-miR-6503-3p_L-1R-1_1ss7AG | GGACTGGGATGCAGACCTC     | down | -inf  | -inf  | 9.72E-04 |
| hsa-miR-4742-3p_R-1           | TCTGTATTCTCCTTTGCCTGCA  | down | 0.38  | -1.39 | 9.90E-04 |
| hsa-miR-129-5p                | CTTTTTGCGGTCTGGGCTTGC   | down | 0.05  | -4.36 | 1.01E-03 |
| hsa-miR-4429_R+1_1ss11CT      | AAAAGCTGGGTTGAGAGGCGA   | down | 0.16  | -2.69 | 1.02E-03 |
| hsa-miR-340-5p                | TTATAAAGCAATGAGACTGATT  | up   | 2.18  | 1.12  | 1.03E-03 |
| hsa-miR-1273h-5p_R+2          | CTGGGAGGTCAAGGCTGCAGTGT | up   | 5.70  | 2.51  | 1.03E-03 |
| cja-miR-1895_L-4_1ss14CG      | TGAGGAGGAGGAGGAGGA      | down | 0.04  | -4.56 | 1.04E-03 |
| PC-3p-24862_589               | AGGGACGCACCGCTGGTG      | down | 0.05  | -4.19 | 1.05E-03 |
| PC-3p-76092_150               | CGCCTGTCTCATTCTCTGCAGT  | up   | inf   | inf   | 1.05E-03 |
| bta-miR-1246_L-1R+3           | ATGGATTTTTGGAGCAGGGAG   | down | 0.02  | -5.88 | 1.05E-03 |
| hsa-miR-625-5p_R-1            | AGGGGGAAAGTTCTATAGTC    | down | 0.29  | -1.80 | 1.07E-03 |
| bta-mir-1264-p3_1ss5AT        | AAGATTAAGAGAACCAACA     | up   | 65.53 | 6.03  | 1.10E-03 |
| hsa-miR-676-3p_R+1            | CTGTCCTAAGGTTGTTGAGTTT  | down | -inf  | -inf  | 1.11E-03 |
| hsa-miR-1268b_R-2             | CGGGCGTGGTGGTGGGGG      | down | 0.21  | -2.24 | 1.11E-03 |
| hsa-miR-1268a                 | CGGGCGTGGTGGTGGGGG      | down | 0.21  | -2.24 | 1.11E-03 |
| hsa-miR-326_R+1               | CCTCTGGGCCCTTCCTCCAGT   | up   | 4.82  | 2.27  | 1.14E-03 |
| PC-3p-95714_110               | CAGCGGCTGCGCATCTCGGG    | down | -inf  | -inf  | 1.15E-03 |
| hsa-miR-374b-3p               | CTTAGCAGGTTGTATTATCATT  | up   | 2.93  | 1.55  | 1.15E-03 |
| hsa-miR-125b-5p_R-2           | TCCCTGAGACCCTAACTTGT    | down | 0.17  | -2.57 | 1.17E-03 |
| hsa-miR-30b-5p                | TGTAACATCCTACACTCAGCT   | up   | 1.88  | 0.91  | 1.17E-03 |
| hsa-miR-145-5p_R-1            | GTCCAGTTTTCCAGGAATCCC   | down | 0.32  | -1.64 | 1.19E-03 |
| hsa-miR-582-3p                | TAACTGGTTGAACAACCTGAACC | down | 0.01  | -6.34 | 1.23E-03 |
| hsa-miR-98-3p_1ss22CT         | CTATACAACCTACTACTTTCCCT | up   | 2.64  | 1.40  | 1.23E-03 |
| hsa-miR-484                   | TCAGGCTCAGTCCCCTCCCGAT  | down | 0.61  | -0.72 | 1.24E-03 |

|                          |                          |      |       |       |          |
|--------------------------|--------------------------|------|-------|-------|----------|
| bta-miR-378_L-2R+1       | TGGACTTGGAGTCAGAAGGCT    | down | -inf  | -inf  | 1.26E-03 |
| hsa-miR-659-5p           | AGGACCTTCCCTGAACCAAGGA   | down | -inf  | -inf  | 1.31E-03 |
| hsa-miR-4646-5p          | ACTGGGAAGAGGAGCTGAGGGA   | down | 0.03  | -5.00 | 1.32E-03 |
| hsa-miR-548ay-5p_R-1     | AAAAGTAATTGTGGTTTTTG     | down | 0.37  | -1.44 | 1.32E-03 |
| ppy-miR-548a             | AAAAGTAATTGTGGTTTTTG     | down | 0.37  | -1.44 | 1.32E-03 |
| hsa-miR-548ad-5p         | AAAAGTAATTGTGGTTTTTG     | down | 0.37  | -1.44 | 1.32E-03 |
| bta-miR-150              | TCTCCAACCCTTGTACCAGTGT   | down | 0.20  | -2.34 | 1.32E-03 |
| PC-5p-14422_992          | ACTTGACTGCTCTGACCA       | up   | 35.22 | 5.14  | 1.32E-03 |
| hsa-let-7d-5p            | AGAGGTAGTAGGTTGCATAGTT   | down | 0.44  | -1.19 | 1.34E-03 |
| hsa-miR-625-3p           | GACTATAGAACTTTCCCCCTCA   | up   | 2.27  | 1.18  | 1.37E-03 |
| hsa-miR-7849-3p_R+2      | GACAATTGTTGATCTTGGGCCTGA | up   | 10.67 | 3.42  | 1.38E-03 |
| hsa-miR-19b-3p           | TGTGCAAATCCATGCAAAACTGA  | down | 0.39  | -1.36 | 1.41E-03 |
| mmu-mir-6236-p3_1ss2AG_2 | CGGCCGTCGCCGGCAGTC       | down | 0.31  | -1.69 | 1.41E-03 |
| mmu-mir-6236-p3_1ss2AG_1 | AGCTAGCCCTGAAAATGGAT     | down | 0.31  | -1.69 | 1.41E-03 |
| hsa-miR-181c-5p_R+2      | AACATTCAACCTGTCGGTGAGTTT | up   | 2.50  | 1.32  | 1.42E-03 |
| mdo-miR-22-3p            | AAGCTGCCAGTTGAAGAACTGC   | down | 0.17  | -2.57 | 1.42E-03 |
| hsa-miR-6516-5p_R-1      | TTTGACAGTAACAGGTGTGAGC   | up   | 6.37  | 2.67  | 1.43E-03 |
| hsa-miR-6859-5p_R-2      | GAGAGGAACATGGGCTCAGGA    | down | 0.16  | -2.68 | 1.46E-03 |
| mmu-miR-486a-5p_R+2      | TCCTGTACTGAGCTGCCCCGAGGT | down | 0.14  | -2.85 | 1.46E-03 |
| hsa-miR-409-5p           | AGGTTACCCGAGCAACTTTGCAT  | up   | 4.11  | 2.04  | 1.48E-03 |
| hsa-miR-338-5p_R-1       | AACAATATCCTGGTGCTGAGT    | down | 0.49  | -1.03 | 1.49E-03 |
| hsa-miR-223-3p_R+1       | TGTCAGTTTGTCAAATACCCCAA  | up   | 2.01  | 1.01  | 1.52E-03 |
| hsa-miR-516a-5p_R-1      | TTCTCGAGGAAAGAAGCACTTT   | down | 0.00  | -7.67 | 1.52E-03 |
| PC-5p-36522_384          | TCTTAGGAAGCGAAGCAAT      | down | 0.08  | -3.56 | 1.53E-03 |
| eca-mir-8986a-p5_1ss1GA  | ATCGAGGCTAGAGTCACGCTTGG  | down | 0.54  | -0.90 | 1.54E-03 |
| mmu-miR-1983             | CTCACCTGGAGCATGTTTTCT    | up   | 2.97  | 1.57  | 1.56E-03 |

|                         |                          |      |       |       |          |
|-------------------------|--------------------------|------|-------|-------|----------|
| hsa-miR-4466_R+2        | GGGTGCGGGCCGGCGGGGTC     | down | 0.11  | -3.17 | 1.59E-03 |
| hsa-miR-5695_L-1R+1     | CTCCAAGAAGAATCTAGACAGA   | down | -inf  | -inf  | 1.60E-03 |
| bta-miR-199c_L-1R+4     | ACAGTAGTCTGCACATTGGTTTC  | up   | 10.45 | 3.39  | 1.62E-03 |
| hsa-miR-4672            | TTACACAGCTGGACAGAGGCA    | down | -inf  | -inf  | 1.63E-03 |
| hsa-mir-3199-1-p5       | ACTGCCTTAGGAGAAAGTTTCT   | down | 0.03  | -4.85 | 1.68E-03 |
| hsa-mir-3199-2-p5       | ACTGCCTTAGGAGAAAGTTTCT   | down | 0.03  | -4.85 | 1.68E-03 |
| hsa-miR-10401-3p_L+1R-1 | GACCTCGCCGTCCCGCCCGCC    | down | 0.39  | -1.35 | 1.71E-03 |
| PC-3p-103492_100        | GAAATAATCTATTCTGAGGCTTT  | up   | inf   | inf   | 1.71E-03 |
| ssc-mir-4332-p5_1ss12CT | CGGGGGTGGGGTTCGGCGGGGG   | down | 0.02  | -5.88 | 1.72E-03 |
| hsa-miR-548ag_1ss4GA    | AAAAGTAATTGTGGTTTCTGC    | up   | 5.27  | 2.40  | 1.73E-03 |
| bta-miR-199c_L-1R+2     | ACAGTAGTCTGCACATTGGCT    | up   | 14.09 | 3.82  | 1.75E-03 |
| hsa-miR-147b-3p         | GTGTGCGGAAATGCTTCTGCT    | down | 0.12  | -3.08 | 1.79E-03 |
| bta-mir-1264-p5_1ss5AT  | AAGATTAAGAGAACCAAC       | up   | inf   | inf   | 1.83E-03 |
| hsa-miR-362-3p_1ss22AT  | AACACACCTATTCAAGGATTCT   | down | 0.05  | -4.26 | 1.85E-03 |
| PC-5p-60328_204         | AGAATATGGGAGTCTGTGGCT    | down | 0.34  | -1.56 | 1.88E-03 |
| PC-5p-133941_74         | AAATTTGACTGGCTATTTT      | up   | inf   | inf   | 1.88E-03 |
| PC-5p-41840_326         | TTGGTCTTCTCTGCCCTCCAGT   | up   | 11.39 | 3.51  | 1.91E-03 |
| hsa-miR-6772-3p         | TTGCTCCTGACTCTGTGCCCA    | up   | inf   | inf   | 1.99E-03 |
| PC-5p-121193_83         | AAAAGTAATTGTGGTTTTTGTGT  | up   | inf   | inf   | 1.99E-03 |
| hsa-miR-301b-3p         | CAGTGCAATGATATTGTCAAAGC  | up   | 4.90  | 2.29  | 2.06E-03 |
| hsa-miR-2115-3p         | CATCAGAATTCATGGAGGCTAG   | down | -inf  | -inf  | 2.07E-03 |
| hsa-miR-4523            | GACCGAGAGGGCCTCGGCTGT    | up   | 15.41 | 3.95  | 2.08E-03 |
| hsa-miR-501-5p_R+2      | AATCCTTTGTCCCTGGGTGAGAGT | down | 0.26  | -1.96 | 2.11E-03 |
| hsa-miR-769-5p          | TGAGACCTCTGGGTTCTGAGCT   | up   | 1.61  | 0.69  | 2.13E-03 |
| hsa-miR-548j-5p         | AAAAGTAATTGCGGTCTTTGGT   | up   | 3.80  | 1.93  | 2.13E-03 |

|                           |                           |      |       |       |          |
|---------------------------|---------------------------|------|-------|-------|----------|
| mdo-miR-181a-5p_R+3_2     | AACATTCAACGCTGTCGGTGAGTTT | up   | 36.43 | 5.19  | 2.14E-03 |
|                           | T                         |      |       |       |          |
| mdo-miR-181a-5p_R+3_1     | AACATTCAACGCTGTCGGTGAGTTA | up   | 36.43 | 5.19  | 2.14E-03 |
|                           | T                         |      |       |       |          |
| hsa-miR-5000-3p_R-1       | TCAGGACACTTCTGAACTTGG     | down | -inf  | -inf  | 2.16E-03 |
| PC-3p-111035_92           | TAAAAACCGTGACTACTTCT      | down | 0.02  | -5.99 | 2.18E-03 |
| PC-3p-97333_108           | TTAGAGGTTTCGGGGGATGT      | down | 0.03  | -5.07 | 2.20E-03 |
| hsa-miR-27b-5p            | AGAGCTTAGCTGATTGGTGAAC    | up   | 4.06  | 2.02  | 2.22E-03 |
| rno-miR-539-5p_R+2        | GGAGAAATTATCCTTGGTGTGTTT  | up   | inf   | inf   | 2.24E-03 |
| hsa-miR-1228-5p           | GTGGGCGGGGGCAGGTGTGTG     | down | -inf  | -inf  | 2.26E-03 |
| PC-5p-295297_33           | ACAGCGAGAGGCAGCTCTGG      | down | 0.10  | -3.32 | 2.26E-03 |
| PC-3p-228736_42           | ACGGAAACGGAAACAAAGCTTT    | down | -inf  | -inf  | 2.30E-03 |
| hsa-miR-124-3p_R-3        | TAAGGCACGCGGTGAATGC       | down | -inf  | -inf  | 2.31E-03 |
| hsa-miR-5187-5p           | TGGGATGAGGGATTGAAGTGGGA   | up   | 5.56  | 2.48  | 2.31E-03 |
| hsa-miR-509-3p            | TGATTGGTACGTCTGTGGGTAG    | down | 0.11  | -3.19 | 2.32E-03 |
| hsa-mir-1273c-p3          | CAGAGTCTCGTTCTGTTGCC      | down | 0.45  | -1.16 | 2.34E-03 |
| hsa-miR-324-5p_R+1        | CGCATCCCCTAGGGCATTGGTGT   | up   | 3.44  | 1.78  | 2.36E-03 |
| PC-3p-56114_225           | TCAGGTGGGGAGTTTGGCTG      | down | 0.03  | -5.16 | 2.39E-03 |
| hsa-miR-12136_R+8         | GAAAAAGTCATGGAGGCCATGGGG  | up   | 4.45  | 2.15  | 2.42E-03 |
|                           | TT                        |      |       |       |          |
| PC-3p-29968_482           | CAGAAACCAGAATTACTTTTGC    | up   | 6.20  | 2.63  | 2.44E-03 |
| bta-mir-1246-p3_1ss18AG_2 | TGGATTTTTGGAGCAGGGAG      | down | 0.01  | -6.12 | 2.45E-03 |
| bta-mir-1246-p3_1ss18AG_1 | AAATGGATTTTTGGAGCGG       | down | 0.01  | -6.12 | 2.45E-03 |
| hsa-miR-1224-5p_R+2       | GTGAGGACTCGGGAGGTGGAG     | down | 0.01  | -6.53 | 2.57E-03 |
| hsa-miR-5581-3p           | TTCCATGCCTCCTAGAAGTTCC    | down | 0.26  | -1.92 | 2.62E-03 |
| hsa-mir-3648-2-p5         | GGGGGAGCCGCGGGGATC        | down | 0.01  | -7.04 | 2.63E-03 |

|                         |                          |      |       |       |          |
|-------------------------|--------------------------|------|-------|-------|----------|
| hsa-miR-6740-5p_L-2R+2  | TTTGGGATGGAGAGAGGAGAAA   | down | -inf  | -inf  | 2.69E-03 |
| hsa-miR-145-3p_L-2R+1   | ATTCTGGAAATACTGTTCTT     | down | 0.34  | -1.55 | 2.69E-03 |
| hsa-miR-33a-5p_R-1      | GTGCATTGTAGTTGCATTGC     | up   | 5.99  | 2.58  | 2.70E-03 |
| hsa-miR-660-3p_R-2      | ACCTCCTGTGTGCATGGAT      | down | 0.06  | -3.96 | 2.73E-03 |
| hsa-miR-1296-5p         | TTAGGGCCCTGGCTCCATCTCC   | up   | 2.22  | 1.15  | 2.78E-03 |
| PC-3p-147694_66         | AAGACTTTTTCTCTGACCT      | up   | inf   | inf   | 2.79E-03 |
| hsa-miR-339-5p          | TCCCTGTCTCCAGGAGCTCACG   | up   | 2.53  | 1.34  | 2.85E-03 |
| hsa-miR-675-3p_R+2      | CTGTATGCCCTCACCGCTCAGC   | down | -inf  | -inf  | 2.86E-03 |
| hsa-miR-222-3p_R+3      | AGCTACATCTGGCTACTGGGTCTC | up   | 1.80  | 0.85  | 2.87E-03 |
| PC-5p-386146_24         | TTTAGCACGGACATGGTTCT     | down | -inf  | -inf  | 2.87E-03 |
| hsa-miR-4440_R+1        | TGTCGTGGGGCTTGCTGGCTTGA  | down | -inf  | -inf  | 2.89E-03 |
| hsa-miR-7850-5p         | GTTTGGACATAGTGTGGCTGG    | down | -inf  | -inf  | 2.90E-03 |
| hsa-miR-139-3p          | TGGAGACGCGGCCCTGTTGGAGT  | up   | 2.19  | 1.13  | 2.91E-03 |
| hsa-miR-340-3p_R+1      | TCCGTCTCAGTTACTTTATAGCC  | up   | 3.77  | 1.91  | 2.93E-03 |
| hsa-mir-3929-p3_1ss19TG | AGCACTTTGGGAGGCTGAG      | down | -inf  | -inf  | 2.96E-03 |
| hsa-miR-1260b_1ss9AG    | ATCCCACCGCTGCCACCAT      | up   | 8.96  | 3.16  | 2.97E-03 |
| hsa-miR-202-3p          | AGAGGTATAGGGCATGGGAA     | down | -inf  | -inf  | 2.99E-03 |
| hsa-miR-132-3p          | TAACAGTCTACAGCCATGGTCG   | down | 0.65  | -0.62 | 2.99E-03 |
| oga-miR-28b_R+3_1       | TCGAGGAGCTCACAGTCTAGTAGT | up   | 14.22 | 3.83  | 3.00E-03 |
| oga-miR-28b_R+3_2       | TCGAGGAGCTCACAGTCTAGTTTT | up   | 14.22 | 3.83  | 3.00E-03 |
| hsa-miR-584-3p_R-2      | TCAGTTCAGGCCAACCAGG      | down | -inf  | -inf  | 3.03E-03 |
| PC-3p-24564_597         | CGTGAAATCCTGTCTGAA       | down | 0.16  | -2.62 | 3.03E-03 |
| hsa-miR-380-5p_L+1R-1   | ATGGTTGACCATAGAACATGCG   | up   | 31.17 | 4.96  | 3.04E-03 |
| hsa-miR-1289_R-1        | TGGAGTCCAGGAATCTGCATTT   | down | -inf  | -inf  | 3.09E-03 |
| hsa-miR-101-3p_R+1      | TACAGTACTGTGATAACTGAAG   | down | 0.41  | -1.29 | 3.15E-03 |
| hsa-miR-548ab_L+1R-3    | CAAAAGTAATTGTGGATTTT     | down | 0.05  | -4.39 | 3.15E-03 |

|                                  |                          |      |       |       |          |
|----------------------------------|--------------------------|------|-------|-------|----------|
| hsa-miR-204-3p                   | GCTGGGAAGGCAAAGGGACGT    | down | 0.09  | -3.54 | 3.16E-03 |
| mmu-mir-6236-<br>p3_1ss18GA_2    | GAAAATGGATGGCGCTGAA      | down | 0.05  | -4.26 | 3.17E-03 |
| mmu-mir-6236-<br>p3_1ss18GA_1    | GAAAATGGATGGCGCTGA       | down | 0.05  | -4.26 | 3.17E-03 |
| ssc-mir-4332-p5_1ss9CT           | GGGTGGGGTCGGCGGGGG       | down | 0.14  | -2.85 | 3.18E-03 |
| hsa-miR-301a-3p                  | CAGTGCAATAGTATTGTCAAAGC  | up   | 4.62  | 2.21  | 3.20E-03 |
| cja-miR-3135_L-1_1ss10CG         | AGGCTGGAGTGCAGTGGCG      | down | -inf  | -inf  | 3.20E-03 |
| hsa-miR-224-5p_L-1               | CAAGTCACTAGTGGTTCCGTTTAG | up   | 3.83  | 1.94  | 3.24E-03 |
| hsa-miR-4511_R+1                 | GAAGAACTGTTGCATTTGCCCTG  | down | 0.15  | -2.78 | 3.28E-03 |
| PC-3p-33579_423                  | TTCGCTGGGAATTCAGCCTCT    | down | 0.01  | -7.39 | 3.28E-03 |
| PC-5p-189265_50                  | TTGTGGTCTGGGGTCTTGGGC    | down | -inf  | -inf  | 3.31E-03 |
| hsa-miR-605-3p                   | AGAAGGCACTATGAGATTTAGA   | up   | 8.23  | 3.04  | 3.37E-03 |
| hsa-miR-494-3p_R+1               | TGAAACATACACGGGAAACCTCT  | up   | 3.33  | 1.74  | 3.40E-03 |
| hsa-miR-10400-5p_R-<br>3_1ss12GA | CGGCGGCGGCGACTCTGG       | down | 0.13  | -2.98 | 3.47E-03 |
| PC-3p-48185_274                  | AAGCCTCTGTCCCCACCCCAGT   | up   | 5.28  | 2.40  | 3.48E-03 |
| bta-mir-1246-p5_1ss16AG          | GATTTTTGGAGCAGGGAG       | down | 0.01  | -6.86 | 3.51E-03 |
| hsa-let-7b-3p_1ss22CT            | CTATACAACCTACTGCCTTCCT   | down | 0.38  | -1.38 | 3.54E-03 |
| hsa-miR-3117-3p_R+1              | ATAGGACTCATATAGTGCCAGG   | down | -inf  | -inf  | 3.56E-03 |
| PC-3p-85981_127                  | AAGGTCAGCTCAATGAGAA      | down | 0.03  | -5.07 | 3.58E-03 |
| PC-5p-38571_359                  | AATCCTCACTTTGAATCCATGT   | up   | 9.35  | 3.22  | 3.60E-03 |
| hsa-miR-3191-3p_R-<br>1_1ss22AT  | TGGGGACGTAGCTGGCCAGACT   | up   | 22.64 | 4.50  | 3.63E-03 |
| hsa-miR-12135_1ss9CT             | TAAAGGTTTCGTTTGATAA      | up   | 43.61 | 5.45  | 3.65E-03 |
| pal-mir-9226-p5_1ss18CT          | TCCCTGTTCGGGCGCCATT      | up   | 4.72  | 2.24  | 3.70E-03 |



|                          |                          |      |      |       |          |
|--------------------------|--------------------------|------|------|-------|----------|
| hsa-miR-378j_R+1_1ss14CT | ACTGGATTTGGAGTCAGAAG     | down | -inf | -inf  | 3.72E-03 |
| hsa-miR-570-3p           | CGAAAACAGCAATTACCTTTGC   | down | 0.12 | -3.08 | 3.73E-03 |
| hsa-miR-508-3p_R-3       | TGATTGTAGCCTTTTGGAGT     | down | -inf | -inf  | 3.88E-03 |
| hsa-miR-4637             | TACTAACTGCAGATTCAAGTGA   | down | -inf | -inf  | 3.93E-03 |
| PC-3p-187469_50          | GGCGCCCGGGGAGAAGTGC      | down | -inf | -inf  | 3.99E-03 |
| hsa-miR-3064-3p_L+1R-4   | TTTGCCCACTGCAACACCT      | down | -inf | -inf  | 4.02E-03 |
| hsa-miR-450a-5p_R-2      | TTTTGCGATGTGTTCCCTAAT    | down | 0.57 | -0.80 | 4.08E-03 |
| PC-3p-4847_2746          | GAAGTGGGGTTGTGGGAAT      | down | 0.23 | -2.12 | 4.11E-03 |
| mmu-mir-6236-p3_1ss16GC  | ATGGCGCTGGAGCGTCCGGG     | down | 0.03 | -5.29 | 4.15E-03 |
| hsa-miR-154-3p           | AATCATAACGGTTGACCTATT    | up   | 6.65 | 2.73  | 4.18E-03 |
| hsa-mir-1976-p5_1ss21CT  | CAGCAAGGAAGGCAGGGGTCT    | down | 0.03 | -4.97 | 4.19E-03 |
| hsa-miR-450a-2-3p_L-1    | TTGGGGACATTTTGCATTCAT    | down | 0.29 | -1.77 | 4.19E-03 |
| hsa-miR-4665-5p          | CTGGGGGACGCGTGAGCGCGAGC  | up   | 4.66 | 2.22  | 4.22E-03 |
| hsa-miR-329-3p           | AACACACCTGGTTAACCTCTTT   | up   | 2.98 | 1.57  | 4.25E-03 |
| hsa-miR-671-3p           | TCCGGTTCTCAGGGCTCCACC    | up   | 5.05 | 2.34  | 4.26E-03 |
| mmu-miR-501-3p_R-1       | AATGCACCCGGGCAAGGATTT    | down | -inf | -inf  | 4.26E-03 |
| PC-3p-37476_372          | ATGTTATGATGATGGGCGAAA    | down | 0.02 | -5.89 | 4.28E-03 |
| hsa-miR-382-5p           | GAAGTTGTTTCGTGGTGGATTCCG | up   | 3.84 | 1.94  | 4.29E-03 |
| PC-3p-29103_499          | CTTGAGACTCTGGGTCAGT      | down | 0.02 | -5.73 | 4.36E-03 |
| hsa-miR-6818-5p          | TTGTGTGAGTACAGAGAGCATC   | down | 0.40 | -1.32 | 4.42E-03 |
| hsa-mir-653-p5           | TTGAAACAATCTCTACTGAAC    | down | -inf | -inf  | 4.42E-03 |
| hsa-miR-514a-3p_R-1      | ATTGACACTTCTGTGAGTAG     | down | 0.34 | -1.56 | 4.46E-03 |
| cgr-miR-1260_L-1R+2_5    | TCCCACCGCTGCCACCATA      | up   | inf  | inf   | 4.58E-03 |
| cgr-miR-1260_L-1R+2_1    | TCCCACCGCTGCCACCAAA      | up   | inf  | inf   | 4.58E-03 |
| cgr-miR-1260_L-1R+2_3    | TCCCACCGCTGCCACCAAT      | up   | inf  | inf   | 4.58E-03 |
| cgr-miR-1260_L-1R+2_4    | TCCCACCGCTGCCACCAGA      | up   | inf  | inf   | 4.58E-03 |

|                        |                          |      |      |       |          |
|------------------------|--------------------------|------|------|-------|----------|
| cgr-miR-1260_L-1R+2_2  | TCCCACCGCTGCCACCAAG      | up   | inf  | inf   | 4.58E-03 |
| hsa-miR-3176_R+2       | ACTGGCCTGGGACTACCGGGA    | down | 0.02 | -5.44 | 4.64E-03 |
| hsa-miR-6866-5p_R-2    | TTAGAGGCTGGAATAGAGATT    | down | 0.51 | -0.96 | 4.64E-03 |
| PC-3p-89469_121        | TGCCACAGAACCCTCTAA       | up   | inf  | inf   | 4.65E-03 |
| hsa-miR-873-3p_L-1     | GAGACTGATGAGTTCCCGGGA    | down | -inf | -inf  | 4.67E-03 |
| hsa-miR-548b-5p_R-4    | AAAAGTAATTGTGGTTTT       | down | 0.01 | -6.21 | 4.68E-03 |
| cja-miR-151_R+2        | TCGAGGAGCTCACAGTCTAGTT   | up   | 4.15 | 2.05  | 4.69E-03 |
| hsa-miR-516b-5p        | ATCTGGAGGTAAGAAGCACTTT   | down | -inf | -inf  | 4.73E-03 |
| mdo-miR-200a-3p_R+2    | TAACACTGTCTGGTAACGATGTTT | up   | 4.86 | 2.28  | 4.76E-03 |
| PC-3p-46468_286        | AACTGCATCGTGATGGGGA      | down | 0.16 | -2.60 | 4.79E-03 |
| hsa-miR-200a-5p_R-1    | CATCTTACCGGACAGTGCTGG    | down | 0.08 | -3.72 | 4.83E-03 |
| PC-3p-31070_462        | TTCATCGGCGTAGGGTGA       | down | 0.31 | -1.67 | 4.92E-03 |
| hsa-let-7d-3p          | CTATACGACCTGCTGCCTTTCT   | down | 0.68 | -0.55 | 4.93E-03 |
| hsa-mir-4422-p3        | GCCCTTCTTGATGCTCTTGATT   | up   | 6.90 | 2.79  | 4.98E-03 |
| hsa-miR-2355-3p_L-2R+2 | TGTCCTTGCTGTTTGGAGATAA   | up   | 2.75 | 1.46  | 5.08E-03 |
| hsa-miR-3173-3p_L-1    | AAGGAGGAAATAGGCAGGCCA    | down | 0.03 | -5.18 | 5.11E-03 |
| hsa-miR-152-3p         | TCAGTGCATGACAGAACTTGG    | up   | 1.95 | 0.96  | 5.12E-03 |
| hsa-miR-3065-3p        | TCAGCACCAGGATATTGTTGGAG  | up   | 6.74 | 2.75  | 5.15E-03 |
| hsa-miR-133a-3p_R+1    | TTTGGTCCCCTTCAACCAGCTGT  | up   | 5.11 | 2.35  | 5.20E-03 |
| hsa-miR-939-5p_R-1     | TGGGGAGCTGAGGCTCTGGGGGT  | down | 0.47 | -1.10 | 5.24E-03 |
| hsa-miR-493-3p         | TGAAGGTCTACTGTGTGCCAGG   | up   | 2.73 | 1.45  | 5.26E-03 |
| hsa-miR-3611_R-2       | TTGTGAAGAAAGAAATTCT      | down | 0.30 | -1.72 | 5.33E-03 |
| hsa-miR-941            | CACCCGGCTGTGTGCACATGTGC  | down | 0.31 | -1.71 | 5.40E-03 |
| hsa-miR-3065-5p        | TCAACAAAATCACTGATGCTGGA  | up   | 3.96 | 1.98  | 5.45E-03 |
| hsa-miR-4747-5p_R-3    | AGGGAAGGAGGCTTGGTCT      | down | -inf | -inf  | 5.48E-03 |
| hsa-miR-3920           | ACTGATTATCTTAACTCTCTGA   | up   | 5.11 | 2.35  | 5.48E-03 |

|                           |                          |      |        |       |          |
|---------------------------|--------------------------|------|--------|-------|----------|
| hsa-miR-301a-5p           | GCTCTGACTTTATTGCACTACT   | up   | 3.32   | 1.73  | 5.50E-03 |
| hsa-miR-628-3p            | TCTAGTAAGAGTGGCAGTCGA    | up   | 1.34   | 0.42  | 5.52E-03 |
| mmu-miR-106a-5p           | CAAAGTGCTAACAGTGCAGGTAG  | up   | 9.77   | 3.29  | 5.55E-03 |
| PC-5p-190163_50           | TTAAGTGGGAAACGATGTG      | down | -inf   | -inf  | 5.59E-03 |
| hsa-miR-345-5p_R+1        | GCTGACTCCTAGTCCAGGGCTCT  | down | 0.59   | -0.76 | 5.63E-03 |
| bta-mir-2478-p5_1ss20GA_1 | ATCCCACTTCTGACACCATA     | up   | inf    | inf   | 5.66E-03 |
| bta-mir-2478-p5_1ss20GA_2 | ATCCCACTTCTGACACCATAT    | up   | inf    | inf   | 5.66E-03 |
| hsa-miR-100-5p_R-1        | AACCCGTAGATCCGAACCTTGT   | down | 0.03   | -5.28 | 5.68E-03 |
| hsa-miR-19a-3p            | TGTGCAAATCTATGCAAAACTGA  | down | 0.44   | -1.17 | 5.73E-03 |
| hsa-miR-3682-3p           | TGATGATACAGGTGGAGGTAG    | down | -inf   | -inf  | 5.73E-03 |
| hsa-miR-539-5p            | GGAGAAATTATCCTTGGTGTGT   | up   | 138.15 | 7.11  | 5.78E-03 |
| hsa-miR-493-5p            | TTGTACATGGTAGGCTTTCATT   | up   | 2.89   | 1.53  | 5.80E-03 |
| hsa-mir-548ag-2-p3        | CAAGAACCTCAATTACCTTTGC   | up   | 4.47   | 2.16  | 5.81E-03 |
| hsa-miR-548ai_R-2         | AAAGGTAATTGCAGTTTTTC     | down | -inf   | -inf  | 5.85E-03 |
| mmu-mir-3535-p3           | CCTCTAGATAGTCAAGTTCTGATC | down | -inf   | -inf  | 5.90E-03 |
| hsa-miR-487b-3p           | AATCGTACAGGGTCATCCACTT   | up   | 6.71   | 2.75  | 5.90E-03 |
| hsa-miR-513c-5p_R-2       | TTCTCAAGGAGGTGTCGTTT     | down | 0.02   | -5.74 | 5.95E-03 |
| hsa-let-7a-5p             | TGAGGTAGTAGGTTGTATAGTT   | down | 0.43   | -1.21 | 5.96E-03 |
| hsa-miR-6509-5p_R-1       | ATTAGGTAGTGGCAGTGGAA     | down | 0.02   | -5.53 | 5.96E-03 |
| hsa-miR-18b-3p_L+3R-5     | TACTGCCCTAAATGCCCTT      | down | -inf   | -inf  | 5.98E-03 |
| hsa-miR-551b-3p_R+1       | GCGACCCATACTTGGTTTCAGT   | up   | 10.86  | 3.44  | 5.98E-03 |
| hsa-miR-4755-3p           | AGCCAGGCTCTGAAGGGAAAGT   | down | 0.06   | -3.95 | 6.04E-03 |
| hsa-mir-548ba-p3          | CAAAAAGTCAATTACTTT       | down | 0.18   | -2.51 | 6.04E-03 |
| hsa-miR-548aq-3p_R-3      | CAAAAAGTCAATTACTTT       | down | 0.18   | -2.51 | 6.04E-03 |
| hsa-miR-548ae-3p_R-2      | CAAAAAGTCAATTACTTT       | down | 0.18   | -2.51 | 6.04E-03 |
| hsa-miR-4645-3p_L+2R-1    | CGAGACAGTAGTTCTTGCCTGGT  | up   | 3.80   | 1.93  | 6.10E-03 |

|                          |                          |      |       |       |          |
|--------------------------|--------------------------|------|-------|-------|----------|
| hsa-miR-548a-3p          | CAAAACTGGCAATTACTTTTGC   | up   | 3.30  | 1.72  | 6.14E-03 |
| hsa-miR-320d_R-1         | AAAAGCTGGGTTGAGAGG       | down | 0.06  | -4.06 | 6.23E-03 |
| mmu-miR-107-5p_R+1       | AGCTTCTTTACAGTGTTGCCTTGT | up   | inf   | inf   | 6.29E-03 |
| PC-3p-129317_77          | TAGGTCACTGGGGTCAGAG      | down | 0.28  | -1.83 | 6.30E-03 |
| PC-3p-92753_115          | AATTTGACTGGCTTATTT       | up   | 15.50 | 3.95  | 6.30E-03 |
| hsa-miR-1-3p             | TGGAATGTAAGAAGTATGTAT    | up   | 4.27  | 2.09  | 6.52E-03 |
| hsa-miR-3135a_R+1        | TGCCTAGGCTGAGACTGCAGTGA  | down | 0.13  | -2.98 | 6.53E-03 |
| mmu-miR-6412_R-2_1ss15AT | TCGAAACCATCCTCTGCTAC     | down | 0.27  | -1.86 | 6.54E-03 |
| hsa-miR-873-5p_L+1R-3    | TGCAGGAACTTGTGAGTCT      | down | 0.01  | -6.11 | 6.63E-03 |
| hsa-miR-191-3p_L-1       | CTGCGCTTGGATTTTCGTCCCC   | up   | 2.13  | 1.09  | 6.68E-03 |
| hsa-miR-6876-5p          | CAGGAAGGAGACAGGCAGTTCA   | up   | 3.58  | 1.84  | 6.73E-03 |
| hsa-miR-543              | AAACATTCGCGGTGCACTTCTT   | up   | 3.33  | 1.74  | 6.82E-03 |
| hsa-miR-16-1-3p          | CCAGTATTAAGTGTGCTGCTGA   | down | 0.45  | -1.15 | 6.91E-03 |
| mmu-miR-421-5p           | CTCATTAATGTTTGTGAAT      | up   | inf   | inf   | 6.92E-03 |
| hsa-mir-548v-p5          | AAAAGTAATTGCGGTTTT       | down | -inf  | -inf  | 6.93E-03 |
| hsa-miR-127-5p_R+1       | CTGAAGCTCAGAGGGCTCTGATT  | up   | 3.46  | 1.79  | 7.00E-03 |
| hsa-miR-1908-5p          | CGGCGGGGACGGCGATTGGTC    | up   | 2.58  | 1.37  | 7.09E-03 |
| hsa-miR-196b-5p_R-1      | TAGGTAGTTTCCTGTTGTTGG    | down | 0.57  | -0.81 | 7.12E-03 |
| hsa-miR-6515-5p          | TTGGAGGGTGTGGAAGACATC    | up   | 3.66  | 1.87  | 7.15E-03 |
| ggo-miR-1277_R+1         | TACGTAGATATATATGTATTTT   | up   | 4.86  | 2.28  | 7.18E-03 |
| hsa-miR-628-5p           | ATGCTGACATATTTACTAGAGG   | up   | 3.11  | 1.64  | 7.22E-03 |
| hsa-miR-4781-3p_L-2R+3   | TGTTGGAATCCTCGCTAGAGCGT  | down | 0.04  | -4.54 | 7.26E-03 |
| hsa-miR-6884-5p          | AGAGGCTGAGAAGGTGATGTTG   | down | 0.03  | -5.32 | 7.27E-03 |
| hsa-mir-3159-p3_1ss21TC  | TCACGCCTGTAATCCCAGCACT   | down | -inf  | -inf  | 7.27E-03 |
| hsa-miR-3913-5p          | TTTGGGACTGATCTTGATGTCT   | down | 0.54  | -0.88 | 7.33E-03 |

|                          |                         |      |       |       |          |
|--------------------------|-------------------------|------|-------|-------|----------|
| bta-miR-1260b_R+2_1ss9AG | ATCCCACCGCTGCCACCACT    | up   | 5.69  | 2.51  | 7.35E-03 |
| hsa-mir-3922-p3          | TGTGGGACTTCTGGCCTTGA    | down | 0.35  | -1.52 | 7.37E-03 |
| hsa-mir-548al-p3_1ss7GC  | AAAAACCGCAATGACTTTTG    | down | 0.14  | -2.81 | 7.38E-03 |
| hsa-miR-194-5p_R-1       | TGTAACAGCAACTCCATGTGG   | down | 0.06  | -3.99 | 7.40E-03 |
| hsa-miR-320c_R-1         | AAAAGCTGGGTTGAGAGGG     | down | 0.11  | -3.22 | 7.41E-03 |
| hsa-miR-6747-3p_R-1      | TCCTGCCTTCTCTGCACCA     | down | 0.07  | -3.81 | 7.41E-03 |
| PC-5p-104097_99          | TGGAGAAAGGACTTCAGGGAGT  | down | 0.04  | -4.83 | 7.45E-03 |
| PC-3p-147533_66          | TAACTTGTGTGACTTTGGGCGA  | down | -inf  | -inf  | 7.46E-03 |
| hsa-miR-4498_R+1         | TGGGCTGGCAGGGCAAGTGCTGC | down | 0.13  | -2.97 | 7.67E-03 |
| hsa-miR-21-5p            | TAGCTTATCAGACTGATGTTGA  | up   | 2.27  | 1.18  | 7.72E-03 |
| hsa-miR-490-3p_R+1       | CAACCTGGAGGACTCCATGCTGT | up   | 8.88  | 3.15  | 7.74E-03 |
| PC-5p-100312_104         | ATTGGACTTTGAACAGATC     | down | -inf  | -inf  | 7.78E-03 |
| hsa-miR-4797-3p_L-2R+2   | TCAGTAAGTGGCACTCTGTCT   | down | 0.14  | -2.86 | 7.79E-03 |
| hsa-miR-5193             | TCCTCCTCTACCTCATCCCAGT  | up   | 5.16  | 2.37  | 7.80E-03 |
| PC-5p-278729_35          | AGGCAGGGTCGGGTAGGGGGCA  | down | -inf  | -inf  | 7.81E-03 |
| PC-3p-81713_137          | AGGCGGGGTTGTGGGAGAG     | down | -inf  | -inf  | 7.85E-03 |
| hsa-miR-590-3p           | TAATTTTATGTATAAGCTAGT   | up   | 3.03  | 1.60  | 8.09E-03 |
| hsa-miR-20a-3p_R+1       | ACTGCATTATGAGCACTTAAAGT | up   | 4.94  | 2.30  | 8.14E-03 |
| bta-miR-2887_L-6R+4      | CGGGGTCCGGTGCGGAGT      | down | 0.25  | -2.02 | 8.31E-03 |
| hsa-miR-3163_R-1         | TATAAAATGAGGGCAGTAAGA   | down | -inf  | -inf  | 8.36E-03 |
| PC-3p-23817_616          | TTGCTGGGAAAGGGAGAAGTTC  | up   | 2.21  | 1.15  | 8.36E-03 |
| hsa-miR-4489             | TGGGGCTAGTGATGCAGGACG   | down | -inf  | -inf  | 8.39E-03 |
| hsa-miR-6750-5p_L-1R-3   | AGGGAACAGCTGGGTGAGCT    | down | -inf  | -inf  | 8.41E-03 |
| cgr-miR-130b-3p_R+2      | CAGTGCAATGATGAAAGGGCATT | up   | 15.39 | 3.94  | 8.41E-03 |
| PC-3p-71053_164          | AATAAGCGGAGGAAAAGAAA    | down | -inf  | -inf  | 8.41E-03 |
| PC-5p-64281_188          | AGCAGCATTGTACAGGGAAA    | down | -inf  | -inf  | 8.50E-03 |

|                             |                          |      |      |       |          |
|-----------------------------|--------------------------|------|------|-------|----------|
| hsa-miR-548ax_R-1           | AGAAGTAATTGCGGTTTTGCC    | up   | 5.81 | 2.54  | 8.52E-03 |
| hsa-miR-664a-3p             | TATTCATTTATCCCCAGCCTACA  | up   | 2.77 | 1.47  | 8.56E-03 |
| hsa-miR-500b-5p_L+1R+3      | TAATCCTTGCTACCTGGGTGAG   | down | 0.06 | -4.15 | 8.63E-03 |
| hsa-miR-181b-3p             | CTCACTGAACAATGAATGCAA    | up   | 3.21 | 1.68  | 8.67E-03 |
| hsa-miR-125b-1-3p_R-2       | ACGGGTTAGGCTCTTGGGAG     | down | -inf | -inf  | 8.72E-03 |
| PC-3p-84256_131             | CGCGTGGCCTGCTGGGAGTTGT   | up   | inf  | inf   | 8.78E-03 |
| hsa-miR-379-5p              | TGGTAGACTATGGAACGTAGG    | up   | 3.87 | 1.95  | 8.89E-03 |
| dno-miR-146a-5p_L-5         | ACTGAATTCCATGGGTTT       | up   | inf  | inf   | 8.89E-03 |
| hsa-miR-1271-5p_R-1         | CTTGGCACCTAGCAAGCACTC    | up   | 1.79 | 0.84  | 8.89E-03 |
| PC-3p-94741_112             | CCAGGTGTCTTCCATTCTGTCC   | up   | inf  | inf   | 8.91E-03 |
| hsa-mir-600-p5              | CATAGGAAGGCTCTTGTCTGT    | down | -inf | -inf  | 8.91E-03 |
| hsa-miR-423-5p              | TGAGGGGCAGAGAGCGAGACTTT  | down | 0.69 | -0.53 | 9.01E-03 |
| mdo-miR-153-1-5p_L+1        | GTCATTTTTGTGATCTGCAGCT   | up   | 4.18 | 2.06  | 9.03E-03 |
| hsa-miR-1291_L+1R-2         | GTGGCCCTGACTGAAGACCAGCA  | down | -inf | -inf  | 9.08E-03 |
| hsa-miR-320b_R-2            | AAAAGCTGGGTTGAGAGGGC     | down | 0.15 | -2.75 | 9.09E-03 |
| hsa-miR-556-3p_R-1          | ATATTACCATTAGCTCATCTT    | up   | 3.43 | 1.78  | 9.13E-03 |
| mmu-miR-6238_L-1R-3_1ss12TC | TATTAGTCAGCGGAGGAA       | down | 0.28 | -1.85 | 9.25E-03 |
| hsa-mir-3929-p5_1ss5AT      | CACCTGTAATCCCAGCACTT     | down | -inf | -inf  | 9.28E-03 |
| hsa-miR-433-3p              | ATCATGATGGGCTCCTCGGTGT   | up   | 3.05 | 1.61  | 9.44E-03 |
| PC-5p-87005_125             | GAAGAAGGCTAGGGGACAG      | down | -inf | -inf  | 9.52E-03 |
| hsa-miR-23b-3p_R+1          | ATCACATTGCCAGGGATTACCACT | up   | 1.67 | 0.74  | 9.55E-03 |
| hsa-mir-548i-1-p5           | TTAGGTTGGTGCAAAAGTAA     | down | 0.03 | -5.04 | 9.69E-03 |
| hsa-mir-548f-4-p5           | TTAGGTTGGTGCAAAAGTAA     | down | 0.03 | -5.04 | 9.69E-03 |
| hsa-mir-548y-p5             | TTAGGTTGGTGCAAAAGTAA     | down | 0.03 | -5.04 | 9.69E-03 |
| PC-5p-388722_24             | TAAGGCCATCGTAAGTTGAAA    | up   | inf  | inf   | 9.87E-03 |

|                        |                          |      |      |       |          |
|------------------------|--------------------------|------|------|-------|----------|
| hsa-miR-4533_R+2       | TGGAAGGAGGTTGCCGGACGCTGT | up   | 9.31 | 3.22  | 9.90E-03 |
| hsa-miR-17-5p          | CAAAGTGCTTACAGTGCAGGTAG  | up   | 2.16 | 1.11  | 1.01E-02 |
| hsa-miR-106a-5p_1ss1AC | CAAAGTGCTTACAGTGCAGGTAG  | up   | 2.16 | 1.11  | 1.01E-02 |
| PC-3p-143650_68        | TTCCTGTTTGGGCTCTGCTAT    | up   | inf  | inf   | 1.02E-02 |
| hsa-miR-4750-5p_R+1    | CTCGGGCGGAGGTGGTTGAGTGT  | up   | 5.48 | 2.45  | 1.02E-02 |
| hsa-miR-30b-3p         | CTGGGAGGTGGATGTTTACTTC   | up   | 4.22 | 2.08  | 1.02E-02 |
| PC-5p-111666_91        | TGGAGAGAAAGGCAGTTAG      | down | 0.03 | -5.32 | 1.02E-02 |
| hsa-mir-4485-p3_1ss1CT | TGTTTAAACGGCCGCGGTAC     | up   | 2.78 | 1.48  | 1.03E-02 |
| PC-3p-128622_77        | TCTTGACTAGCTTGCTGTTT     | down | -inf | -inf  | 1.03E-02 |
| hsa-miR-181a-3p        | ACCATCGACCGTTGATTGTACC   | up   | 1.98 | 0.99  | 1.04E-02 |
| hsa-miR-3155b_R+3      | CCAGGCTCTGCAGTGGGAAC     | down | 0.02 | -5.89 | 1.04E-02 |
| hsa-miR-103a-3p        | AGCAGCATTGTACAGGGCTATGA  | up   | 1.94 | 0.96  | 1.04E-02 |
| hsa-miR-6764-5p        | TCCCAGGGTCTGGTCAGAGTTG   | down | 0.29 | -1.80 | 1.04E-02 |
| PC-3p-120076_84        | CAAAGAATTCCCCTTGGGCT     | down | -inf | -inf  | 1.05E-02 |
| hsa-miR-2115-5p_R-2    | AGCTTCCATGACTCCTGATG     | down | -inf | -inf  | 1.06E-02 |
| hsa-miR-548ay-3p_R-1   | CAAAACCGCGATTACTCTTGC    | down | 0.29 | -1.80 | 1.06E-02 |
| hsa-miR-219a-5p        | TGATTGTCCAAACGCAATTCT    | down | -inf | -inf  | 1.06E-02 |
| hsa-miR-4731-5p_R-1    | TGCTGGGGGCCACATGAGTGT    | down | -inf | -inf  | 1.07E-02 |
| hsa-miR-381-3p         | TATACAAGGGCAAGCTCTCTGT   | up   | 1.95 | 0.96  | 1.07E-02 |
| PC-3p-164403_58        | AATAATCAGCGGGGAAAGA      | down | -inf | -inf  | 1.09E-02 |
| hsa-miR-193a-5p        | TGGGTCTTTGCGGGCGAGATGA   | down | 0.03 | -5.15 | 1.09E-02 |
| PC-5p-203106_47        | AAATGTAAGTGCAGTTTTTGGGA  | up   | inf  | inf   | 1.10E-02 |
| PC-3p-365143_26        | TTGAGGTCCGACATGGTGGCTT   | down | -inf | -inf  | 1.10E-02 |
| hsa-miR-518e-5p_R-1    | CTCTAGAGGGAAGCGCTTTCT    | down | -inf | -inf  | 1.10E-02 |
| hsa-miR-551a           | GCGACCCACTCTTGGTTTCCA    | down | 0.02 | -5.83 | 1.11E-02 |
| hsa-mir-548ax-p3       | CAAAAACCGTAATTACTTTTGT   | up   | 2.43 | 1.28  | 1.11E-02 |

|                         |                          |      |       |       |          |
|-------------------------|--------------------------|------|-------|-------|----------|
| mdo-miR-26-5p_R+3       | TTCAAGTAATCCAGGATAGGCTAG | up   | 3.61  | 1.85  | 1.11E-02 |
| hsa-miR-6730-3p_1ss22AT | CCTGACACCCCATCTGCCCTCT   | down | -inf  | -inf  | 1.12E-02 |
| PC-5p-99555_105         | TTAGTCTAGCACCTGGTCAATTC  | up   | inf   | inf   | 1.12E-02 |
| hsa-miR-30d-3p          | CTTTCAGTCAGATGTTTTGTGTC  | up   | 1.73  | 0.79  | 1.13E-02 |
| PC-5p-146020_66         | AGGGACGGCCGGGGGCAAG      | down | -inf  | -inf  | 1.13E-02 |
| PC-5p-22651_648         | CATCTCATCCTGGGGCTGTA     | down | 0.41  | -1.29 | 1.13E-02 |
| PC-3p-126191_79         | TCTCTGGGGGTGACTGTCCGT    | down | -inf  | -inf  | 1.13E-02 |
| hsa-miR-4516_R+1        | GGGAGAAGGGTCGGGGCG       | down | -inf  | -inf  | 1.13E-02 |
| hsa-miR-1185-1-3p       | ATATACAGGGGAGACTCTTAT    | up   | 3.64  | 1.87  | 1.13E-02 |
| hsa-miR-181a-2-3p       | ACCACTGACCGTTGACTGTACC   | down | 0.62  | -0.69 | 1.15E-02 |
| mmu-miR-92a-3p_R+2_2    | TATTGCACTTGTCCCGCCTGAG   | down | 0.30  | -1.73 | 1.16E-02 |
| mmu-miR-92a-3p_R+2_1    | TATTGCACTTGTCCCGCCTGAA   | down | 0.30  | -1.73 | 1.16E-02 |
| hsa-miR-1262            | ATGGGTGAATTTGTAGAAGGAT   | down | -inf  | -inf  | 1.16E-02 |
| PC-5p-70731_165         | TAAGAGGGACGGAGGAGG       | down | 0.04  | -4.61 | 1.17E-02 |
| hsa-miR-4474-3p_R-2     | TTGTGGCTGGTCATGAGGCT     | down | 0.08  | -3.57 | 1.17E-02 |
| hsa-miR-23a-5p          | GGGGTTCCTGGGGATGGGATTT   | up   | 2.05  | 1.04  | 1.18E-02 |
| hsa-miR-20a-5p          | TAAAGTGCTTATAGTGCAGGTAG  | up   | 2.15  | 1.10  | 1.19E-02 |
| hsa-miR-6875-5p         | TGAGGGACCCAGGACAGGAGA    | down | 0.06  | -4.17 | 1.19E-02 |
| hsa-miR-3617-5p         | AAAGACATAGTTGCAAGATGGG   | up   | 19.10 | 4.26  | 1.20E-02 |
| bta-miR-2478_L-2R+1_1   | ATCCCACTTCTGACACCAA      | up   | 2.53  | 1.34  | 1.21E-02 |
| bta-miR-2478_L-2R+1_3   | ATCCCACTTCTGACACCAT      | up   | 2.53  | 1.34  | 1.21E-02 |
| bta-miR-2478_L-2R+1_2   | ATCCCACTTCTGACACCAG      | up   | 2.53  | 1.34  | 1.21E-02 |
| PC-3p-96428_109         | TAGAGGTTCTGGGGGATGT      | down | -inf  | -inf  | 1.22E-02 |
| PC-5p-148359_65         | ACCAGGCAAGAACTACTGTCT    | down | 0.06  | -4.13 | 1.23E-02 |
| hsa-miR-19b-1-5p        | AGTTTTGCAGTTTGCATCCAGC   | up   | 10.84 | 3.44  | 1.24E-02 |
| hsa-miR-1914-5p_R+1     | CCCTGTGCCCGGCCCACTTCTGC  | up   | inf   | inf   | 1.26E-02 |



|                                    |                          |      |      |       |          |
|------------------------------------|--------------------------|------|------|-------|----------|
| mmu-miR-2137_L-2R-<br>1_1ss16AG    | CGGCGGGAGCCCCGGGGA       | down | 0.25 | -1.98 | 1.26E-02 |
| PC-5p-481280_16                    | TATGATGGCTGTAACAAGAAATTT | down | -inf | -inf  | 1.26E-02 |
| hsa-miR-99a-5p_R-1                 | AACCCGTAGATCCGATCTTGT    | down | 0.07 | -3.83 | 1.27E-02 |
| PC-3p-366052_26                    | ATTTGCTGTAAAGATATGGGAT   | down | -inf | -inf  | 1.29E-02 |
| bta-miR-11971_R-1                  | TGAGGGGCAGAGAGTGAGA      | down | -inf | -inf  | 1.29E-02 |
| hsa-miR-3140-5p                    | ACCTGAATTACCAAAAGCTTT    | down | 0.17 | -2.53 | 1.29E-02 |
| hsa-miR-3157-5p_R-2                | TTCAGCCAGGCTAGTGCAGT     | down | 0.13 | -2.93 | 1.29E-02 |
| hsa-miR-190a-5p_R+1                | TGATATGTTTGATATATTAGGTT  | up   | 4.47 | 2.16  | 1.31E-02 |
| PC-3p-4764_2788                    | GAGGGCGCGCGGGTCGGG       | down | 0.02 | -5.95 | 1.31E-02 |
| ptr-mir-618-p3                     | TCAGGAGACAAGCAGGGTTAC    | down | -inf | -inf  | 1.32E-02 |
| hsa-miR-556-5p_R-1                 | GATGAGCTCATTGTAATATGA    | up   | 6.65 | 2.73  | 1.32E-02 |
| hsa-miR-4660_R+1                   | TGCAGCTCTGGTGGAAAATGGAGA | down | -inf | -inf  | 1.32E-02 |
| hsa-miR-708-3p_R-2                 | CAACTAGACTGTGAGCTTCT     | down | 0.03 | -5.00 | 1.32E-02 |
| hsa-miR-548az-5p_L-<br>2R+1_1ss8GA | AAAGTAATTGTGGTTTTTGTCT   | down | 0.27 | -1.89 | 1.35E-02 |
| hsa-mir-548ac-p5_1ss6TA            | AAAGTAATTGTGGTTTTTGTCT   | down | 0.27 | -1.89 | 1.35E-02 |
| PC-3p-11702_1197                   | AAAGTGGACGTATAGGGT       | down | 0.34 | -1.56 | 1.35E-02 |
| hsa-miR-4659b-3p_L+1R-1            | TTTTCTTCTTAGACATGGCAGC   | up   | 1.89 | 0.92  | 1.39E-02 |
| hsa-miR-5584-5p                    | CAGGGAAATGGGAAGAACTAGA   | up   | 2.98 | 1.58  | 1.40E-02 |
| ggo-mir-1277-p5                    | TATATATATATATGTACGTAT    | up   | 4.91 | 2.30  | 1.41E-02 |
| PC-3p-90463_119                    | AACAGCGGGGAAAGAAGAC      | down | -inf | -inf  | 1.42E-02 |
| hsa-miR-4504                       | TGTGACAATAGAGATGAACATG   | down | 0.10 | -3.32 | 1.42E-02 |
| hsa-miR-485-5p_R+1                 | AGAGGCTGGCCGTGATGAATTCG  | up   | 2.77 | 1.47  | 1.44E-02 |
| hsa-miR-296-3p_L-1R-2              | AGGGTTGGGTGGAGGCTCT      | down | 0.41 | -1.29 | 1.47E-02 |
| hsa-miR-654-5p                     | TGGTGGGCCGCAGAACATGTGC   | up   | 3.28 | 1.71  | 1.48E-02 |

|                            |                          |      |       |       |          |
|----------------------------|--------------------------|------|-------|-------|----------|
| PC-3p-143720_68            | ATTTGGCCTTTTATGTTCTTGA   | down | 0.07  | -3.87 | 1.48E-02 |
| bta-miR-378_R+1_1ss22CA    | ACTGGACTTGGAGTCAGAAGGAT  | down | 0.18  | -2.48 | 1.49E-02 |
| hsa-miR-766-5p_R+1         | AGGAGGAATTGGTGCTGGTCTTT  | up   | 1.87  | 0.91  | 1.50E-02 |
| hsa-miR-323b-3p_R-1        | CCCAATACACGGTCGACCTCT    | up   | 2.11  | 1.08  | 1.50E-02 |
| hsa-miR-5094_L-1R+1        | ATCAGTGAATGCCTTGAACCTA   | down | 0.27  | -1.87 | 1.50E-02 |
| hsa-miR-361-5p             | TTATCAGAATCTCCAGGGGTAC   | up   | 1.70  | 0.76  | 1.51E-02 |
| hsa-miR-362-5p_R-2         | AATCCTTGGAACCTAGGTGTGA   | down | 0.45  | -1.16 | 1.51E-02 |
| bta-miR-191b_1ss2AG        | GGACGAAATCCAAGCGCAGCTG   | up   | inf   | inf   | 1.52E-02 |
| hsa-miR-3614-5p_R-1        | CCACTTGGATCTGAAGGCTGCC   | down | 0.01  | -6.71 | 1.54E-02 |
| mmu-miR-339-5p_R-1_1ss22CT | TCCCTGTCCTCCAGGAGCTCAT   | up   | 4.43  | 2.15  | 1.54E-02 |
| hsa-miR-4503_R-1           | TTTAAGCAGGAAATAGAATTT    | down | -inf  | -inf  | 1.55E-02 |
| hsa-miR-375-3p             | TTTGTTTCGTTCCGGCTCGCGTGA | down | 0.09  | -3.45 | 1.55E-02 |
| hsa-miR-378a-3p            | ACTGGACTTGGAGTCAGAAGGC   | down | 0.17  | -2.55 | 1.55E-02 |
| hsa-miR-1270               | CTGGAGATATGGAAGAGCTGTGT  | down | 0.29  | -1.77 | 1.56E-02 |
| hsa-miR-202-5p_R-1         | TTCCTATGCATATACTTCTTT    | down | -inf  | -inf  | 1.56E-02 |
| hsa-miR-378c_R-5           | ACTGGACTTGGAGTCAGAAG     | down | 0.19  | -2.42 | 1.57E-02 |
| bta-miR-339b_R+3_1         | TCCCTGTCTCCAGGAGCTCAAT   | up   | 8.89  | 3.15  | 1.57E-02 |
| bta-miR-339b_R+3_3         | TCCCTGTCTCCAGGAGCTCAGT   | up   | 8.89  | 3.15  | 1.57E-02 |
| bta-miR-339b_R+3_2         | TCCCTGTCTCCAGGAGCTCACT   | up   | 8.89  | 3.15  | 1.57E-02 |
| hsa-miR-4433b-5p_R+1       | ATGTCCCACCCCCACTCCTGTT   | up   | 16.21 | 4.02  | 1.59E-02 |
| cgr-miR-1260_R+2_5         | ATCCCACCGCTGCCACCATA     | up   | 3.93  | 1.98  | 1.61E-02 |
| cgr-miR-1260_R+2_4         | ATCCCACCGCTGCCACCACA     | up   | 3.93  | 1.98  | 1.61E-02 |
| cgr-miR-1260_R+2_3         | ATCCCACCGCTGCCACCAAT     | up   | 3.93  | 1.98  | 1.61E-02 |
| cgr-miR-1260_R+2_2         | ATCCCACCGCTGCCACCAAG     | up   | 3.93  | 1.98  | 1.61E-02 |
| cgr-miR-1260_R+2_1         | ATCCCACCGCTGCCACCAAA     | up   | 3.93  | 1.98  | 1.61E-02 |

|                             |                          |      |       |       |          |
|-----------------------------|--------------------------|------|-------|-------|----------|
| hsa-miR-548bc               | AAAAACTGTGATTACTTTTGC    | down | 0.51  | -0.97 | 1.61E-02 |
| hsa-miR-6734-5p             | TTGAGGGGAGAATGAGGTGGAGA  | down | 0.49  | -1.03 | 1.61E-02 |
| hsa-miR-23a-3p_R+1          | ATCACATTGCCAGGGATTCCA    | up   | 1.56  | 0.64  | 1.62E-02 |
| hsa-miR-1276                | TAAAGAGCCCTGTGGAGACA     | down | 0.04  | -4.67 | 1.63E-02 |
| mmu-miR-146a-5p_R+2         | TGAGAACTGAATTCCATGGGTAA  | up   | 1.70  | 0.77  | 1.63E-02 |
| PC-5p-135472_73             | TGGGGTGGAGTAGGGCAGGAA    | up   | 16.56 | 4.05  | 1.64E-02 |
| mmu-miR-5126_L-4_1ss18CT    | GCGGGGCCGGGGTGGGG        | down | 0.14  | -2.84 | 1.64E-02 |
| hsa-mir-3166-p5             | GAGGCCAGTAGGCATTGTCTGC   | up   | 7.32  | 2.87  | 1.64E-02 |
| PC-5p-67594_176             | ACTGCCACTTGTAGTCTTCCTTT  | up   | 3.76  | 1.91  | 1.64E-02 |
| hsa-miR-3188_1ss23GT        | AGAGGCTTTGTGCGGATACGGGT  | up   | 5.45  | 2.44  | 1.66E-02 |
| hsa-miR-432-5p_1ss23GT      | TCTTGAGTAGGTCATTGGGTGT   | up   | 2.21  | 1.14  | 1.66E-02 |
| PC-3p-129011_77             | TGAGCTCTCTGCACTCCCAGG    | up   | 10.16 | 3.34  | 1.66E-02 |
| bta-miR-378_L-1R+1          | CTGGACTTGGAGTCAGAAGGCT   | down | 0.14  | -2.89 | 1.67E-02 |
| hsa-miR-4753-5p_L-1R+1      | AAGGCCAAAGGAAGAGAACAGA   | down | -inf  | -inf  | 1.67E-02 |
| hsa-miR-148a-3p             | TCAGTGCACTACAGAACTTTGT   | down | 0.33  | -1.59 | 1.68E-02 |
| hsa-miR-3680-3p_R-1         | TTTTGCATGACCCTGGGAGTAG   | down | -inf  | -inf  | 1.70E-02 |
| mmu-miR-5100_L-1R-1_1ss15TG | CGAATCCCAGCGGGGCCCTC     | down | -inf  | -inf  | 1.70E-02 |
| hsa-miR-7110-5p_R+1         | TGGGGGTGTGGGGAGAGAGAGT   | up   | inf   | inf   | 1.72E-02 |
| hsa-miR-4444_L+4R+1         | TGAACTCGAGTTGGAAGAGGCGA  | down | -inf  | -inf  | 1.73E-02 |
| mmu-let-7j_1ss8TG           | TGAGGTAGTAGTTTGTGCTGTTAT | up   | 2.40  | 1.26  | 1.74E-02 |
| hsa-miR-411-3p_R-1          | TATGTAACACGGTCCACTAAC    | up   | 3.05  | 1.61  | 1.75E-02 |
| hsa-miR-1228-3p_R+1         | TCACACCTGCCTCGCCCCCA     | down | -inf  | -inf  | 1.75E-02 |
| hsa-miR-6783-5p             | TAGGGGAAAAGTCCTGATCCGG   | down | 0.05  | -4.41 | 1.76E-02 |
| hsa-miR-9983-3p             | TTTTTTGCTGGAACATTTCTGG   | up   | inf   | inf   | 1.76E-02 |

|                          |                         |      |       |       |          |
|--------------------------|-------------------------|------|-------|-------|----------|
| hsa-miR-4639-5p          | TTGCTAAGTAGGCTGAGATTGA  | down | 0.26  | -1.97 | 1.76E-02 |
| PC-3p-243877_40          | TGCAGCATAGGGCAGTTAGGA   | up   | inf   | inf   | 1.77E-02 |
| hsa-mir-599-p5           | TTTGATAAGCTGACATGGGAC   | down | -inf  | -inf  | 1.78E-02 |
| hsa-miR-6807-5p          | GTGAGCCAGTGGAATGGAGAGG  | down | 0.05  | -4.45 | 1.79E-02 |
| PC-5p-62128_197          | ATGTTTCATGGACTGAAAGACT  | down | 0.22  | -2.21 | 1.80E-02 |
| efu-mir-9277-p5          | TCGTGGCCGAGTGGTTAAG     | down | 0.02  | -5.56 | 1.80E-02 |
| hsa-miR-128-3p           | TCACAGTGAACCGGTCTCTTT   | up   | 1.57  | 0.65  | 1.80E-02 |
| hsa-miR-6733-5p_L+1      | TTGGGAAAGACAAACTCAGAGTT | down | 0.03  | -5.12 | 1.80E-02 |
| hsa-let-7f-1-3p_1ss22CT  | CTATACAATCTATTGCCTTCCT  | down | 0.40  | -1.34 | 1.81E-02 |
| hsa-mir-7849-p5          | TGTTGAACATCAGACTCAAGGC  | up   | 10.95 | 3.45  | 1.81E-02 |
| hsa-miR-126-3p_R-1       | TCGTACCGTGAGTAATAATGC   | up   | 1.57  | 0.65  | 1.81E-02 |
| hsa-miR-4484_L+2R-4      | AAAAAAGGCGGGAGAAGC      | down | 0.18  | -2.45 | 1.83E-02 |
| hsa-miR-1185-5p_R+1      | AGAGGATACCCTTTGTATGTTC  | up   | 7.02  | 2.81  | 1.84E-02 |
| hsa-miR-196b-3p_R+1      | TCGACAGCACGACACTGCCTTCA | down | 0.09  | -3.40 | 1.86E-02 |
| hsa-miR-5004-3p_R+1      | CTTGGATTTTCCTGGGCCTCAGT | up   | inf   | inf   | 1.87E-02 |
| hsa-miR-130a-5p          | GCTCTTTTCACATTGTGCTACT  | up   | inf   | inf   | 1.87E-02 |
| PC-5p-505426_15          | TCCTGGCTGGGTTTATGGAG    | down | -inf  | -inf  | 1.87E-02 |
| PC-5p-517991_14          | GTAGTTTACTGGGGTGGT      | down | -inf  | -inf  | 1.89E-02 |
| hsa-miR-1260a_R+3_1ss9TG | ATCCCACCGCTGCCACCAAAA   | up   | 4.28  | 2.10  | 1.92E-02 |
| hsa-miR-6793-5p_L+2R-3   | ACTGTGGGTTCTGGGTTGGGG   | down | -inf  | -inf  | 1.94E-02 |
| PC-5p-514458_14          | AGCTGAAGTGTAAGAGGTTGA   | down | -inf  | -inf  | 1.96E-02 |
| hsa-miR-4669_R-1         | TGTGTCCGGAAGTGAGGAG     | down | 0.01  | -6.26 | 1.97E-02 |
| hsa-miR-328-3p           | CTGGCCCTCTCTGCCCTTCCGT  | up   | 6.43  | 2.68  | 1.97E-02 |
| PC-3p-33359_426          | GGAGGAACCTTGAGCTTCGGCT  | up   | 3.70  | 1.89  | 1.99E-02 |
| hsa-miR-758-3p_R-1       | TTTGTGACCTGGTCCACTAAC   | up   | 4.10  | 2.04  | 1.99E-02 |
| hsa-miR-487a-3p          | AATCATACAGGGACATCCAGTT  | up   | 4.02  | 2.01  | 1.99E-02 |

|                           |                           |      |      |       |          |
|---------------------------|---------------------------|------|------|-------|----------|
| mml-miR-607_L-1R+1_1ss2TA | ATATAGATCTGGATTGGAACC     | down | -inf | -inf  | 2.02E-02 |
| hsa-miR-3177-3p           | TGCACGGCACTGGGGACACGT     | up   | 2.25 | 1.17  | 2.05E-02 |
| bta-miR-2478_L-1_1ss11TC  | TATCCCACTCCTGACACCA       | up   | 6.78 | 2.76  | 2.05E-02 |
| hsa-miR-432-3p_L+1        | ACTGGATGGCTCCTCCATGTCT    | up   | inf  | inf   | 2.06E-02 |
| hsa-miR-378g_R+2          | ACTGGGCTTGGAGTCAGAAGGC    | down | 0.17 | -2.58 | 2.07E-02 |
| hsa-mir-641-p3            | TGACTGTCCTATGTCTTTCCT     | up   | 3.08 | 1.62  | 2.09E-02 |
| PC-5p-234738_41           | GTTCTCTTCTTAACACCA        | up   | inf  | inf   | 2.13E-02 |
| hsa-miR-154-5p            | TAGGTTATCCGTGTTGCCTTCG    | up   | 3.73 | 1.90  | 2.19E-02 |
| ocu-miR-194-3p_R-2        | CCAGTGGAGATGCTGTTACT      | down | -inf | -inf  | 2.19E-02 |
| PC-5p-34098_416           | TGGGGGAAGGGAGCTAGCCTGACT  | up   | 4.71 | 2.24  | 2.20E-02 |
| PC-3p-386754_24           | CTTCACTGCATACTCCAGCCT     | down | -inf | -inf  | 2.21E-02 |
| hsa-miR-411-5p            | TAGTAGACCGTATAGCGTACG     | up   | 3.05 | 1.61  | 2.21E-02 |
| hsa-miR-4683_R-1          | TGGAGATCCAGTGCTCGCCCGA    | down | 0.04 | -4.50 | 2.26E-02 |
| hsa-miR-369-5p_R-1        | AGATCGACCGTGTATATTCG      | up   | 4.97 | 2.31  | 2.27E-02 |
| hsa-miR-221-5p_R+2        | ACCTGGCATAACAATGTAGATTTCT | up   | 1.82 | 0.87  | 2.27E-02 |
| hsa-miR-655-3p            | ATAATACATGGTTAACCTCTTT    | up   | 8.68 | 3.12  | 2.28E-02 |
| hsa-miR-410-3p            | AATATAACACAGATGGCCTGT     | up   | 2.86 | 1.51  | 2.29E-02 |
| PC-3p-170351_55           | GTGGGAGGCTTTGAAACC        | down | -inf | -inf  | 2.30E-02 |
| hsa-miR-206               | TGGAATGTAAGGAAGTGTGTGG    | down | 0.01 | -7.61 | 2.30E-02 |
| PC-3p-103652_100          | AGGTTGTAGGATGCTAAACAGA    | up   | 5.46 | 2.45  | 2.31E-02 |
| hsa-miR-93-3p_R+1         | ACTGCTGAGCTAGCACTTCCCGA   | down | 0.65 | -0.62 | 2.31E-02 |
| hsa-miR-1185-2-3p         | ATATACAGGGGAGACTCTCAT     | up   | 2.74 | 1.45  | 2.34E-02 |
| hsa-miR-29b-1-5p_R-4      | GCTGGTTTCATATGGTGGTT      | down | -inf | -inf  | 2.35E-02 |
| mmu-miR-3963_R+2_1ss1TC   | CGTATCCCACCTTCTGACACCA    | down | 0.13 | -2.98 | 2.36E-02 |
| hsa-miR-125b-2-3p_L-2     | ACAAGTCAGGCTCTTGGGAC      | down | 0.01 | -6.37 | 2.38E-02 |

|                                 |                          |      |       |       |          |
|---------------------------------|--------------------------|------|-------|-------|----------|
| PC-5p-370386_26                 | ATTGATGGCATCGAACCAGG     | down | -inf  | -inf  | 2.38E-02 |
| hsa-miR-548j-3p                 | CAAAAACCTGCATTACTTTTGC   | up   | 3.40  | 1.77  | 2.41E-02 |
| PC-3p-106369_97                 | AGTTGGATCTTGGGAGAAA      | up   | inf   | inf   | 2.41E-02 |
| hsa-miR-197-3p                  | TTCACCACCTTCTCCACCCAGC   | up   | 2.20  | 1.14  | 2.41E-02 |
| hsa-miR-487a-5p                 | GTGGTTATCCCTGCTGTGTTCG   | up   | 3.24  | 1.70  | 2.41E-02 |
| hsa-miR-3130-5p_R+1_1ss12CT     | TACCCAGTCTCTGGTGCAGCCT   | down | 0.06  | -4.06 | 2.42E-02 |
| hsa-miR-335-3p                  | TTTTTCATTATTGCTCCTGACC   | up   | 8.18  | 3.03  | 2.44E-02 |
| hsa-miR-509-3-5p                | TACTGCAGACGTGGCAATCATG   | down | -inf  | -inf  | 2.46E-02 |
| mmu-mir-6240-p3_1ss10CT_1       | ATTTCTGCCTAGTGCTCTGA     | down | -inf  | -inf  | 2.47E-02 |
| mmu-mir-6240-p3_1ss10CT_2       | GATTTCTGCTCAGTGCTCT      | down | -inf  | -inf  | 2.47E-02 |
| rno-miR-1843b-5p_L+1R-2_1ss19AG | TATGGAGGTCTCTGTCTGGCTT   | up   | 1.45  | 0.54  | 2.47E-02 |
| hsa-miR-2355-5p_R+1             | ATCCCCAGATACAATGGACAAT   | up   | 2.08  | 1.05  | 2.49E-02 |
| hsa-miR-3691-5p_L+1R-2          | TAGTGGATGATGGAGACTCGGT   | down | 0.26  | -1.96 | 2.51E-02 |
| hsa-miR-512-3p_R-2              | AAGTGCTGTCATAGCTGAGG     | down | -inf  | -inf  | 2.51E-02 |
| hsa-miR-6892-5p                 | GTAAGGGACCGGAGAGTAGGA    | up   | 11.01 | 3.46  | 2.52E-02 |
| hsa-miR-511-3p_R+2              | AATGTGTAGCAAAAAGACAGAAT  | down | -inf  | -inf  | 2.52E-02 |
| hsa-miR-30c-1-3p_R-2            | CTGGGAGAGGGTTGTTACT      | up   | 3.23  | 1.69  | 2.52E-02 |
| PC-5p-173008_55                 | CAGACACAGGTATGGCTGGCTCC  | up   | inf   | inf   | 2.53E-02 |
| hsa-miR-148b-3p                 | TCAGTGCATCACAGAACTTTGT   | up   | 1.56  | 0.65  | 2.53E-02 |
| hsa-miR-5090_L+1R-4             | CCCGGGGCAGATTGGTGTAG     | down | -inf  | -inf  | 2.53E-02 |
| oga-miR-100_R+2                 | AACCCGTAGATCCGAACTTGTGAA | down | -inf  | -inf  | 2.54E-02 |
| hsa-miR-4717-3p                 | ACACATGGGTGGCTGTGGCCT    | down | 0.05  | -4.26 | 2.55E-02 |

|                       |                               |      |      |       |          |
|-----------------------|-------------------------------|------|------|-------|----------|
| hsa-miR-652-5p_L+1R-1 | ACAACCCTAGGAGAGGGTGCCATT<br>C | up   | 3.47 | 1.79  | 2.60E-02 |
| PC-5p-127847_78       | ATTGGCACTGCACATGATTG          | down | -inf | -inf  | 2.60E-02 |
| PC-3p-164451_58       | TTGGTCAATGTATTGGTCTGCAT       | up   | 5.79 | 2.53  | 2.60E-02 |
| PC-5p-299757_33       | CACACTGACACAGAGAGAGAGA        | down | -inf | -inf  | 2.60E-02 |
| hsa-miR-548am-3p_R-2  | CAAAAACCTGCAGTTACTTTT         | down | 0.09 | -3.54 | 2.61E-02 |
| hsa-miR-4479_R-1      | CGCGCGGCCGTGCTCGGAGCA         | down | 0.17 | -2.58 | 2.61E-02 |
| PC-5p-232230_41       | TAGGACAAAGGGCCCCGGGTGC        | down | 0.04 | -4.61 | 2.62E-02 |
| hsa-miR-210-3p        | CTGTGCGTGTGACAGCGGCTGA        | down | 0.61 | -0.72 | 2.63E-02 |
| hsa-miR-629-3p        | GTTCTCCCAACGTAAGCCCAGC        | down | 0.25 | -2.01 | 2.63E-02 |
| hsa-miR-758-5p_L-1R+1 | ATGGTTGACCAGAGAGCACACG        | up   | 5.10 | 2.35  | 2.63E-02 |
| PC-5p-373569_25       | TTGGGAAAATGGTAGTGAAGGA        | down | -inf | -inf  | 2.64E-02 |
| hsa-miR-210-5p        | AGCCCCTGCCACCGCACACTG         | up   | inf  | inf   | 2.65E-02 |
| PC-5p-180544_52       | TAACTCTTAGAATCCCCAAAG         | down | -inf | -inf  | 2.65E-02 |
| hsa-let-7g-3p         | CTGTACAGGCCACTGCCTTGC         | down | 0.19 | -2.43 | 2.66E-02 |
| hsa-miR-4635_R-1      | TCTTGAAGTCAGAACCCGCA          | down | -inf | -inf  | 2.67E-02 |
| hsa-miR-4467_R-1      | TGGCGGCGGTAGTTATGGGCT         | down | 0.14 | -2.85 | 2.68E-02 |
| hsa-miR-548s_R-1      | ATGGCCAAAACCTGCAGTTATTT       | down | 0.07 | -3.77 | 2.71E-02 |
| hsa-miR-6813-5p       | CAGGGGCTGGGGTTTCAGGTTCT       | up   | 2.56 | 1.36  | 2.75E-02 |
| hsa-miR-369-3p        | AATAATACATGGTTGATCTTT         | up   | 2.90 | 1.54  | 2.76E-02 |
| hsa-miR-146b-5p_R+1   | TGAGAACTGAATTCCATAGGCTGT      | up   | 1.34 | 0.42  | 2.77E-02 |
| PC-5p-311599_32       | ACTGCTGCAGATGGAAAAGTTC        | down | -inf | -inf  | 2.77E-02 |
| PC-5p-310574_32       | TTTGAGAGAACTTCGCCCTTGT        | down | -inf | -inf  | 2.78E-02 |
| hsa-miR-548ba         | AAAGGTAACCTGTGATTTTGTCT       | up   | inf  | inf   | 2.78E-02 |
| hsa-miR-377-5p        | AGAGGTTGCCCTTGGTGAATTC        | up   | 5.06 | 2.34  | 2.79E-02 |

|                           |                            |      |       |       |          |
|---------------------------|----------------------------|------|-------|-------|----------|
| mdo-miR-26-5p_R+1_1ss10TC | TTCAAGTAACCCAGGATAGGCT     | up   | 1.95  | 0.96  | 2.80E-02 |
| hsa-miR-548at-3p_L+1      | CCAAAACCGCAGTAACTTTTGT     | down | 0.04  | -4.73 | 2.81E-02 |
| mdo-miR-181b-5p_R+3       | AACATTCATTGCTGTCCGGTGGGTTG | up   | 5.83  | 2.54  | 2.82E-02 |
|                           | T                          |      |       |       |          |
| hsa-miR-379-3p_R-1        | TATGTAACATGGTCCACTAAC      | up   | 2.78  | 1.48  | 2.84E-02 |
| hsa-miR-5009-5p_L-1       | TGGACTTTTTTCAGATTTGGGGAT   | down | -inf  | -inf  | 2.85E-02 |
| hsa-mir-1302-1-p5_1ss9AG  | GAATTCAGGTAAACAATGAAT      | up   | 3.17  | 1.66  | 2.86E-02 |
| hsa-miR-429               | TAATACTGTCTGGTAAAACCGT     | down | 0.25  | -1.98 | 2.87E-02 |
| hsa-miR-33a-3p_R-1        | CAATGTTTCCACAGTGCATCA      | up   | 4.74  | 2.24  | 2.91E-02 |
| hsa-miR-497-5p            | CAGCAGCACACTGTGGTTTGT      | down | 0.58  | -0.78 | 2.92E-02 |
| hsa-miR-149-5p_R-3        | TCTGGCTCCGTGTCTTCACT       | down | 0.23  | -2.14 | 2.92E-02 |
| hsa-miR-4638-5p           | ACTCGGCTGCGGTGGACAAGT      | up   | 3.96  | 1.99  | 2.96E-02 |
| hsa-miR-361-3p_R+1        | TCCCCAGGTGTGATTCTGATTG     | down | 0.72  | -0.48 | 2.96E-02 |
| hsa-miR-376a-3p           | ATCATAGAGGAAAATCCACGT      | up   | 3.30  | 1.72  | 2.97E-02 |
| mdo-miR-152-3p_R+3        | TCAGTGCATGACAGAACTTGGGTTT  | up   | 16.94 | 4.08  | 2.98E-02 |
| mmu-mir-6240-p5_1ss21GT   | TTTCTGCCAGTGCTCTGAATGTC    | down | 0.38  | -1.38 | 2.99E-02 |
| hsa-miR-25-5p_R+2         | AGGCGGAGACTTGGGCAATTGCT    | down | 0.58  | -0.79 | 3.02E-02 |
| hsa-mir-6820-p5           | TCTGCGGCAGAGCTGGGGT        | down | -inf  | -inf  | 3.02E-02 |
| hsa-miR-216b-5p           | AAATCTCTGCAGGCAAATGTGA     | down | -inf  | -inf  | 3.05E-02 |
| hsa-miR-3139_R-1          | TAGGAGCTCAACAGATGCCTGT     | down | 0.04  | -4.53 | 3.06E-02 |
| hsa-miR-382-3p_R+1        | AATCATTACGGACAACACTTT      | up   | 2.60  | 1.38  | 3.07E-02 |
| PC-5p-153646_63           | GCCATCGGGGCGAGTGCG         | down | 0.05  | -4.46 | 3.07E-02 |
| hsa-miR-490-5p            | CCATGGATCTCCAGGTGGGT       | up   | 8.84  | 3.14  | 3.10E-02 |
| mmu-miR-431-5p_R-1        | TGCTTGCAGGCCGTCATGC        | up   | 2.85  | 1.51  | 3.11E-02 |
| efu-miR-9226_L-2_1ss22GA  | AAGTCCCTGTTCGGGCGCCA       | down | 0.24  | -2.08 | 3.14E-02 |



|                          |                         |      |      |       |          |
|--------------------------|-------------------------|------|------|-------|----------|
| PC-5p-224252_43          | GTGGGACAAAAGCGTG        | down | 0.11 | -3.17 | 3.15E-02 |
| hsa-miR-130b-3p          | CAGTGCAATGATGAAAGGGCAT  | down | 0.62 | -0.70 | 3.17E-02 |
| hsa-miR-494-5p_R-1       | AGGTTGTCCGTGTTGTCTTCTC  | up   | inf  | inf   | 3.18E-02 |
| hsa-miR-6500-3p          | ACACTTGTGGGATGACCTGC    | down | 0.38 | -1.39 | 3.19E-02 |
| hsa-miR-1249-3p          | ACGCCCTTCCCCCCTTCTTCA   | up   | 3.84 | 1.94  | 3.20E-02 |
| hsa-miR-433-5p           | TACGGTGAGCCTGTCATTATTC  | up   | inf  | inf   | 3.21E-02 |
| pal-miR-9993b-3p_1ss1AT  | TTCTCGCTGGGGCCTCCA      | down | 0.50 | -1.01 | 3.22E-02 |
| PC-3p-403857_23          | TGGCCCAAGACCTCAGACCACT  | down | 0.03 | -4.87 | 3.23E-02 |
| hsa-miR-3179_L+1R-1      | TAGAAGGGGTGAAATTTAAACG  | down | 0.11 | -3.25 | 3.25E-02 |
| hsa-miR-135a-5p          | TATGGCTTTTTATTCCTATGTGA | up   | 2.94 | 1.56  | 3.26E-02 |
| hsa-miR-1910-3p          | GAGGCAGAAGCAGGATGACA    | down | -inf | -inf  | 3.27E-02 |
| chi-miR-16b-5p           | TAGCAGCACGTAAATATTGGGG  | down | -inf | -inf  | 3.31E-02 |
| hsa-miR-141-3p_R-1       | TAACACTGTCTGGTAAAGATG   | down | 0.05 | -4.36 | 3.31E-02 |
| pal-miR-339b-5p_R+1      | TCCCTGTCCTCCAGGAGCTT    | down | 0.23 | -2.14 | 3.35E-02 |
| hsa-miR-143-5p_R-1       | GGTGCAGTGCTGCATCTCTGG   | up   | 3.97 | 1.99  | 3.35E-02 |
| hsa-miR-4743-5p          | TGGCCGGATGGGACAGGAGGCAT | up   | 4.11 | 2.04  | 3.40E-02 |
| hsa-miR-146a-3p_L+1R-2   | ACCTCTGAAATTCAGTTCTTC   | up   | 3.16 | 1.66  | 3.43E-02 |
| hsa-miR-6837-3p          | CCTTCACTGTGACTCTGCTGCAG | up   | 2.25 | 1.17  | 3.47E-02 |
| hsa-miR-539-3p           | ATCATACAAGGACAATTTCTTT  | up   | 2.76 | 1.46  | 3.50E-02 |
| hsa-miR-3174_R-1         | TAGTGAGTTAGAGATGCAGAGC  | up   | 3.73 | 1.90  | 3.53E-02 |
| PC-3p-248853_39          | TGCCCATGAGCTCCACCTGCCT  | down | 0.05 | -4.47 | 3.55E-02 |
| cgr-miR-1260_R+4         | ATCCCACCGCTGCCACCAAAAA  | up   | 2.96 | 1.56  | 3.55E-02 |
| hsa-miR-3064-5p          | TCTGGCTGTTGTGGTGTGCAA   | up   | 2.07 | 1.05  | 3.56E-02 |
| mmu-miR-5100_R-1_1ss15TG | TCGAATCCCAGCGGGGCCTC    | down | -inf | -inf  | 3.63E-02 |
| hsa-miR-299-3p           | TATGTGGGATGGTAAACCGCTT  | up   | 2.24 | 1.17  | 3.66E-02 |

|                         |                          |      |      |       |          |
|-------------------------|--------------------------|------|------|-------|----------|
| efu-miR-9226_L-1R-1     | CAAGTCCCTGTTCCGGGCGCC    | down | -inf | -inf  | 3.67E-02 |
| PC-5p-73128_158         | GGCGGGCCATCACTGTTGGAG    | down | 0.32 | -1.63 | 3.70E-02 |
| rno-miR-3590-3p_R+1     | TAGCACAATGTGAAAAGAGCTCT  | down | -inf | -inf  | 3.71E-02 |
| hsa-miR-152-5p          | AGGTTCTGTGATACTCCGACT    | up   | 2.84 | 1.50  | 3.75E-02 |
| PC-5p-292156_34         | TTGTGTCCAGTTGTTGGGGGAA   | down | -inf | -inf  | 3.76E-02 |
| PC-5p-140549_70         | TCTGGGAGAGAGCTACCGCT     | down | -inf | -inf  | 3.77E-02 |
| hsa-miR-4727-3p         | ATAGTGGGAAGCTGGCAGATTC   | down | -inf | -inf  | 3.79E-02 |
| PC-3p-43735_309         | CCCGCCCCTCCGCGCCCCCAT    | up   | 4.35 | 2.12  | 3.80E-02 |
| hsa-miR-4485-5p_L+1R+2  | CACCGCCTGCCAGTGACA       | up   | 7.80 | 2.96  | 3.81E-02 |
| PC-5p-224026_43         | GTTGGAGGTTGGAGGTTGA      | down | -inf | -inf  | 3.82E-02 |
| hsa-miR-6721-5p_R+1     | TGGGCAGGGGCTTATTGTAGGAGT | up   | 8.62 | 3.11  | 3.86E-02 |
| hsa-miR-378i_R+1_1ss9AT | ACTGGACTTGGAGTCAGAAAGGT  | down | 0.18 | -2.47 | 3.86E-02 |
| hsa-miR-616-3p_L+1R-3   | AAGTCATTGGAGGGTTTGAG     | down | 0.47 | -1.09 | 3.86E-02 |
| hsa-miR-6736-5p         | CTGGGTGAGGGCATCTGTGGT    | up   | 6.45 | 2.69  | 3.88E-02 |
| hsa-miR-147b-5p_R-2     | TGGA AACATTTCTGCACAAA    | down | -inf | -inf  | 3.89E-02 |
| hsa-miR-26a-1-3p        | CCTATTCTTGTTACTTGCACG    | up   | 7.99 | 3.00  | 3.90E-02 |
| PC-3p-392001_24         | TGCAGAGGGACTGGCAGGAAG    | down | -inf | -inf  | 3.91E-02 |
| PC-5p-494846_15         | ATCTGAAATCTGATGAGAAAT    | down | -inf | -inf  | 3.93E-02 |
| PC-3p-264097_37         | ATGCTCTCGGCCTATTCTCA     | down | -inf | -inf  | 3.95E-02 |
| PC-5p-270602_36         | TGCACAGTTCTGGGAGAGAC     | down | 0.10 | -3.35 | 3.97E-02 |
| hsa-miR-186-3p_L-2R+1   | CCAAAGGTGAATTTTTTGGGA    | down | 0.06 | -4.05 | 3.99E-02 |
| PC-3p-656119_10         | TCACCGCCCTTCCCGCCCGCG    | down | -inf | -inf  | 3.99E-02 |
| bta-miR-185_L+2         | TCTGGAGAGAAAGGCAGTTCCTGA | down | -inf | -inf  | 3.99E-02 |
| PC-3p-367049_26         | ATATAGATATCATCAGAGCTGT   | down | -inf | -inf  | 4.03E-02 |
| hsa-miR-4690-3p_R-1     | GCAGCCCAGCTGAGGCCTCT     | down | 0.04 | -4.66 | 4.07E-02 |
| hsa-miR-4435            | ATGGCCAGAGCTCACACAGAGG   | up   | 1.98 | 0.99  | 4.09E-02 |

|                          |                          |      |      |       |          |
|--------------------------|--------------------------|------|------|-------|----------|
| hsa-miR-496_L-2R+1       | AGTATTACATGGCCAATCTCT    | up   | 2.63 | 1.40  | 4.09E-02 |
| hsa-miR-548n             | CAAAAGTAATTGTGGATTTTGT   | up   | 1.82 | 0.86  | 4.11E-02 |
| PC-3p-114333_89          | TACTGGGATATTTGGAGCTTCT   | up   | 4.46 | 2.16  | 4.11E-02 |
| hsa-mir-4473-p5          | CACTTGTAATGGAGAACACT     | down | 0.13 | -2.99 | 4.12E-02 |
| bta-miR-1260b_1ss9AG     | ATCCCACCGCTGCCACCA       | up   | 6.56 | 2.71  | 4.13E-02 |
| cgr-miR-1260             | ATCCCACCGCTGCCACCA       | up   | 6.56 | 2.71  | 4.13E-02 |
| PC-5p-131452_76          | AGATGGGGGAGAACTCAATCCT   | up   | 5.46 | 2.45  | 4.14E-02 |
| PC-5p-335457_29          | GTCGGCGGGGGCCCCGGGA      | down | -inf | -inf  | 4.16E-02 |
| PC-5p-255905_38          | ACACTCATCAACTGTGCCTGA    | down | -inf | -inf  | 4.16E-02 |
| hsa-mir-497-p3_1ss5CA    | AGAGAGAGGGTGGGGGAG       | down | -inf | -inf  | 4.18E-02 |
| hsa-miR-4686_R-4         | TATCTGCTGGGCTTTCTGG      | down | -inf | -inf  | 4.19E-02 |
| ptr-miR-6131_R-1_1ss15GT | GGCTGGTCGGATGGTAGT       | down | -inf | -inf  | 4.20E-02 |
| hsa-miR-103a-2-5p_R+1    | AGCTTCTTTACAGTGCTGCCTTGT | up   | 2.45 | 1.29  | 4.22E-02 |
| PC-3p-400812_23          | AGTCTAAACAAACCTGGAA      | down | -inf | -inf  | 4.22E-02 |
| hsa-miR-29c-5p_R-1       | TGACCGATTTCTCCTGGTGTT    | up   | 1.92 | 0.94  | 4.23E-02 |
| hsa-miR-552-3p           | AACAGGTGACTGGTTAGACAA    | up   | inf  | inf   | 4.24E-02 |
| hsa-miR-6858-5p_L-1      | TGAGGAGGGGCTGGCAGGGAC    | down | -inf | -inf  | 4.25E-02 |
| PC-5p-358054_27          | TTGGAGAACTCTCCTTCCCGG    | down | -inf | -inf  | 4.28E-02 |
| hsa-mir-7851-p5_1ss12AT  | AGTAGCTGGGATTACAGG       | down | 0.04 | -4.73 | 4.30E-02 |
| sha-mir-199a-p5          | CCCAGTGTTACAGACTACCTGTCC | up   | 3.05 | 1.61  | 4.33E-02 |
| hsa-miR-495-3p           | AAACAAACATGGTGCATTCTT    | up   | 1.77 | 0.82  | 4.34E-02 |
| hsa-miR-642b-3p_R-3      | AGACACATTTGGAGAGGGGA     | down | -inf | -inf  | 4.35E-02 |
| hsa-miR-138-5p           | AGCTGGTGTTGTGAATCAGGCCG  | down | -inf | -inf  | 4.41E-02 |
| PC-3p-154505_62          | CTTGACTGGAGGATTCGT       | down | -inf | -inf  | 4.42E-02 |
| hsa-miR-3158-5p_R-1      | CCTGCAGAGAGGAAGCCCTT     | down | -inf | -inf  | 4.46E-02 |

|                              |                          |      |      |       |          |
|------------------------------|--------------------------|------|------|-------|----------|
| hsa-miR-548ar-5p_R-1_1ss10TC | AAAAGTAATCGCAGTTTTTG     | down | 0.28 | -1.85 | 4.46E-02 |
| hsa-miR-548x-5p_L-3_1ss13TC  | AAAAGTAATCGCAGTTTTTG     | down | 0.28 | -1.85 | 4.46E-02 |
| hsa-miR-548h-5p_R-2_1ss13GA  | AAAAGTAATCGCAGTTTTTG     | down | 0.28 | -1.85 | 4.46E-02 |
| hsa-mir-548f-1-p5_1ss11AG    | AAAAGTAATCGCAGTTTTTG     | down | 0.28 | -1.85 | 4.46E-02 |
| hsa-miR-505-3p_R+2           | CGTCAACACTTGCTGGTTTCCTCT | up   | 1.51 | 0.59  | 4.47E-02 |
| ssc-miR-339_R+1_1ss21AT      | TCCCTGTCCTCCAGGAGCTCTT   | up   | 8.56 | 3.10  | 4.48E-02 |
| PC-3p-151959_63              | CCTACAGGCTGGAATGGGCTCAT  | up   | 6.37 | 2.67  | 4.49E-02 |
| PC-5p-469533_17              | CTGCCGGAAGATTTAAATGA     | down | -inf | -inf  | 4.50E-02 |
| hsa-miR-1255b-5p             | CGGATGAGCAAAGAAAGTGGTT   | down | 0.33 | -1.61 | 4.51E-02 |
| PC-3p-84661_130              | CTTCTGGGGTAGAGCACT       | down | -inf | -inf  | 4.51E-02 |
| PC-3p-42568_319              | CTGGCGGCTGTGTCTTCACAGT   | up   | 2.45 | 1.29  | 4.54E-02 |
| hsa-miR-7856-5p              | TTTTAAGGACACTGAGGGATC    | up   | 7.05 | 2.82  | 4.54E-02 |
| mmu-miR-3963_L-1_1ss3TA      | GAATCCCACTTCTGACAC       | down | -inf | -inf  | 4.55E-02 |
| PC-3p-855779_7               | CCTCACTCCTGCCACACCCCTC   | down | -inf | -inf  | 4.56E-02 |
| hsa-miR-30d-5p_R+2           | TGTAAACATCCCCGACTGGAAGCT | down | 0.79 | -0.35 | 4.56E-02 |
| hsa-miR-3160-3p_R-2          | AGAGCTGAGACTAGAAAGCC     | down | -inf | -inf  | 4.57E-02 |
| PC-3p-227929_42              | GGTTAGAGCACTGTCATGG      | down | -inf | -inf  | 4.57E-02 |
| hsa-miR-144-5p               | GGATATCATCATATACTGTAAG   | down | 0.04 | -4.52 | 4.60E-02 |
| PC-3p-259469_38              | TTCCTGTTTGGGCTCTGCTAC    | up   | inf  | inf   | 4.60E-02 |
| PC-5p-318577_31              | TTTGTCTGGGGCCTGGTGAGT    | down | -inf | -inf  | 4.66E-02 |
| hsa-miR-891a-5p              | TGCAACGAACCTGAGCCACTGA   | up   | inf  | inf   | 4.68E-02 |
| PC-5p-132114_75              | AAAAAGATTGAGGCCATGGTAG   | down | -inf | -inf  | 4.69E-02 |
| bta-miR-2478_1ss2TG          | GGATCCCACTTCTGACACCA     | down | 0.17 | -2.53 | 4.70E-02 |

|                          |                         |      |      |       |          |
|--------------------------|-------------------------|------|------|-------|----------|
| hsa-miR-6787-5p_1ss22CT  | TGGCGGGGGTAGAGCTGGCTGT  | down | -inf | -inf  | 4.70E-02 |
| hsa-mir-548ak-p3_1ss12TG | AAAACCGCAATGACTTTTG     | down | -inf | -inf  | 4.70E-02 |
| hsa-miR-1287-5p          | TGCTGGATCAGTGGTTCGAGTC  | up   | 1.55 | 0.63  | 4.72E-02 |
| hsa-miR-6852-3p_L+4R+1   | CTGATGTCCTCTGTTCCCTCAGA | up   | inf  | inf   | 4.74E-02 |
| hsa-miR-7852-3p_R-1      | TATGTAGTAGTCAAAGGCATT   | up   | inf  | inf   | 4.76E-02 |
| hsa-miR-7855-5p          | TTGGTGAGGACCCCAAGCTCGG  | down | 0.25 | -2.00 | 4.79E-02 |
| hsa-miR-337-3p_L-1       | TCCTATATGATGCCTTTCTTC   | up   | 2.65 | 1.41  | 4.81E-02 |
| hsa-miR-5188_L-1R+1      | ATCGGACCCATTTAAACCGGAGA | down | -inf | -inf  | 4.83E-02 |
| PC-5p-226840_42          | GTTGATAGGCCGGGTGTG      | down | 0.10 | -3.38 | 4.87E-02 |
| hsa-miR-1908-3p_R+1      | CCGCCC GCCGGCTCCGCCCGT  | up   | 8.11 | 3.02  | 4.88E-02 |
| hsa-miR-590-5p           | GAGCTTATTCATAAAAAGTGCAG | up   | 4.53 | 2.18  | 4.88E-02 |
| hsa-miR-4700-5p          | TCTGGGGATGAGGACAGTGTGT  | down | -inf | -inf  | 4.90E-02 |
| hsa-miR-330-5p_R-2       | TCTCTGGGCCTGTGTCTTAG    | up   | 1.85 | 0.89  | 4.95E-02 |
| PC-3p-167202_57          | CTCTGAGGGTTGGGCCTAGG    | down | 0.02 | -5.62 | 4.95E-02 |
| hsa-miR-372-3p_R-1       | AAAGTGCTGCGACATTTGAGCG  | down | -inf | -inf  | 4.96E-02 |
| hsa-miR-192-5p           | CTGACCTATGAATTGACAGCC   | down | 0.03 | -5.15 | 4.97E-02 |
| PC-3p-836782_7           | CAGCCTCTGCAGCTCCCCGG    | down | -inf | -inf  | 4.99E-02 |
| hsa-miR-889-3p           | TTAATATCGGACAACCATTGT   | up   | 1.89 | 0.92  | 4.99E-02 |

---

#### Supplementary Material 4. The target genes of indemnified DE miRNAs

| non-smoking IA vs ctrl | smoking IA vs ctrl | smoking IA vs non-smoking IA |
|------------------------|--------------------|------------------------------|
| ARF5                   | ARF5               | ARF5                         |
| M6PR                   | M6PR               | M6PR                         |
| ESRRA                  | ESRRA              | ESRRA                        |
| FKBP4                  | FKBP4              | FKBP4                        |
| CYP26B1                | CYP26B1            | CYP26B1                      |
| NDUFAF7                | NDUFAF7            | NDUFAF7                      |
| FUCA2                  | FUCA2              | FUCA2                        |
| DBNDD1                 | DBNDD1             | DBNDD1                       |
| HS3ST1                 | HS3ST1             | HS3ST1                       |
| SEMA3F                 | SEMA3F             | SEMA3F                       |
| CFTR                   | CFTR               | CFTR                         |
| CYP51A1                | CYP51A1            | CYP51A1                      |
| USP28                  | USP28              | USP28                        |
| STPG1                  | STPG1              | STPG1                        |
| NIPAL3                 | NIPAL3             | NIPAL3                       |
| TMEM176A               | TMEM176A           | TMEM176A                     |
| SLC7A2                 | SLC7A2             | SLC7A2                       |
| HSPB6                  | HSPB6              | HSPB6                        |
| ZNF195                 | ZNF195             | PDK4                         |
| PDK4                   | PDK4               | CCL26                        |
| CCL26                  | CCL26              | USH1C                        |
| USH1C                  | USH1C              | RALA                         |
| RALA                   | RALA               | BCAP29                       |
| BCAP29                 | BCAP29             | BAIAP2L1                     |
| BAIAP2L1               | BAIAP2L1           | CACNG3                       |
| CACNG3                 | CACNG3             | TMEM132A                     |
| TMEM132A               | TMEM132A           | DVL2                         |
| DVL2                   | DVL2               | GGCT                         |
| GGCT                   | GGCT               | RPAP3                        |
| RPAP3                  | RPAP3              | UPP2                         |
| UPP2                   | UPP2               | PRSS21                       |
| PRSS21                 | PRSS21             | HOXA11                       |
| HOXA11                 | HOXA11             | CX3CL1                       |
| CX3CL1                 | CX3CL1             | PRR5                         |
| PRR5                   | PRR5               | TRAPPC6A                     |
| TRAPPC6A               | TRAPPC6A           | SPATA20                      |
| SPATA20                | SPATA20            | CEACAM7                      |
| CEACAM7                | CEACAM7            | CD79B                        |
| CD79B                  | CD79B              | RHBDD2                       |
| RHBDD2                 | RHBDD2             | RPUSD1                       |

|          |          |          |
|----------|----------|----------|
| RPUSD1   | RPUSD1   | TSR3     |
| TSR3     | TSR3     | OSBPL7   |
| OSBPL7   | OSBPL7   | ARHGAP33 |
| ARHGAP33 | ARHGAP33 | NDUFAB1  |
| NDUFAB1  | NDUFAB1  | YBX2     |
| YBX2     | YBX2     | PDK2     |
| PDK2     | PDK2     | ITGA3    |
| ITGA3    | ITGA3    | LRRC23   |
| LRRC23   | LRRC23   | IL32     |
| IL32     | IL32     | TFAP2D   |
| TFAP2D   | TFAP2D   | SPRTN    |
| SPRTN    | SPRTN    | CRY1     |
| CRY1     | CRY1     | PGLYRP1  |
| PGLYRP1  | PGLYRP1  | STARD3NL |
| STARD3NL | STARD3NL | CAMK1G   |
| CAMK1G   | CAMK1G   | CD9      |
| CD9      | CD9      | CD74     |
| CD74     | CD74     | RPS20    |
| RPS20    | DYRK4    | DYRK4    |
| DYRK4    | MGST1    | MGST1    |
| MGST1    | CPA1     | CPA1     |
| CPA1     | SYPL1    | SYPL1    |
| SYPL1    | RANBP9   | RANBP9   |
| RANBP9   | CD4      | CD4      |
| CD4      | PLEKHG6  | PLEKHG6  |
| PLEKHG6  | SS18L2   | SS18L2   |
| SS18L2   | VPS13D   | VPS13D   |
| VPS13D   | TSPAN9   | TSPAN9   |
| TSPAN9   | CYP4F2   | CYP4F2   |
| CYP4F2   | QPCTL    | QPCTL    |
| QPCTL    | HIVEP2   | HIVEP2   |
| HIVEP2   | PPP5C    | PPP5C    |
| PPP5C    | NME1     | NME1     |
| NME1     | UBR7     | UBR7     |
| UBR7     | MAP4K5   | MAP4K5   |
| MAP4K5   | INMT     | INMT     |
| INMT     | ABHD5    | ERCC1    |
| ERCC1    | GPRC5A   | ABHD5    |
| ABHD5    | HEBP1    | GPRC5A   |
| GPRC5A   | DNASE1L1 | HEBP1    |
| HEBP1    | COX15    | DNASE1L1 |
| DNASE1L1 | MS4A12   | COX15    |
| COX15    | RGPD5    | MS4A12   |
| MS4A12   | XYLT2    | RGPD5    |

|           |           |           |
|-----------|-----------|-----------|
| RGPD5     | FTSJ1     | XYLT2     |
| XYLT2     | SCTR      | FTSJ1     |
| FTSJ1     | RALBP1    | SCTR      |
| SCTR      | PSD       | RALBP1    |
| RALBP1    | SYT13     | PSD       |
| PSD       | SNAI2     | SYT13     |
| SYT13     | VDAC3     | SNAI2     |
| SNAI2     | GABRA1    | VDAC3     |
| VDAC3     | RTF2      | SLC7A9    |
| SLC7A9    | SLC45A4   | GABRA1    |
| GABRA1    | RB1CC1    | RTF2      |
| RTF2      | AKAP11    | SLC45A4   |
| SLC45A4   | STRAP     | RB1CC1    |
| RB1CC1    | PIGQ      | AKAP11    |
| AKAP11    | CDH17     | STRAP     |
| STRAP     | RNASET2   | PIGQ      |
| PIGQ      | B4GALT7   | CDH17     |
| CDH17     | SLC39A9   | RNASET2   |
| RNASET2   | FAM13B    | B4GALT7   |
| B4GALT7   | RANBP3    | SLC39A9   |
| SLC39A9   | CHPF2     | FAM13B    |
| FAM13B    | GABARAPL2 | RANBP3    |
| RANBP3    | MYOC      | CHPF2     |
| CHPF2     | FAM136A   | GABARAPL2 |
| GABARAPL2 | NSMAF     | MYOC      |
| MYOC      | OTC       | FAM136A   |
| FAM136A   | TTC17     | NSMAF     |
| NSMAF     | HOXC8     | OTC       |
| OTC       | MRI1      | TTC17     |
| TTC17     | BOD1L1    | HOXC8     |
| HOXC8     | TARBP1    | MRI1      |
| MRI1      | RIPOR1    | BOD1L1    |
| BOD1L1    | BEST2     | TARBP1    |
| TARBP1    | RTN4R     | RIPOR1    |
| RIPOR1    | PSMA4     | BEST2     |
| BEST2     | RIPOR3    | RTN4R     |
| RTN4R     | ZPBP      | PSMA4     |
| PSMA4     | CTNS      | RIPOR3    |
| RIPOR3    | LCP2      | ZPBP      |
| ZPBP      | GOPC      | CTNS      |
| CTNS      | DCN       | LCP2      |
| LCP2      | TNFRSF17  | GOPC      |
| GOPC      | MRPS10    | DCN       |
| DCN       | GRN       | TNFRSF17  |



|          |         |         |
|----------|---------|---------|
| TNFRSF17 | THAP3   | MRPS10  |
| MRPS10   | VAMP3   | GRN     |
| GRN      | RCN1    | THAP3   |
| THAP3    | RFC2    | VAMP3   |
| VAMP3    | PPP1R3F | RCN1    |
| RCN1     | NEXMIF  | RFC2    |
| RFC2     | ARHGEF5 | PPP1R3F |
| PPP1R3F  | NFE2L3  | NEXMIF  |
| NEXMIF   | TNIP3   | ARHGEF5 |
| ARHGEF5  | SIKE1   | NFE2L3  |
| NFE2L3   | TLL1    | TNIP3   |
| TNIP3    | CBLN4   | SIKE1   |
| SIKE1    | CLDN11  | TLL1    |
| TLL1     | FAM168A | CBLN4   |
| CBLN4    | RELT    | CLDN11  |
| CLDN11   | CDC27   | FAM168A |
| FAM168A  | PKP2    | RELT    |
| RELT     | IL1RAP  | CDC27   |
| CDC27    | YIPF1   | PKP2    |
| PKP2     | ADCK2   | IL1RAP  |
| IL1RAP   | INPP4A  | YIPF1   |
| YIPF1    | SLC2A3  | ADCK2   |
| ADCK2    | ENPP2   | INPP4A  |
| INPP4A   | CTDP1   | SLC2A3  |
| SLC2A3   | STYK1   | ENPP2   |
| ENPP2    | GNA11   | CTDP1   |
| CTDP1    | CREB3L3 | STYK1   |
| STYK1    | PIGV    | GNA11   |
| GNA11    | HDAC7   | CREB3L3 |
| CREB3L3  | MRPS35  | PIGV    |
| PIGV     | APPBP2  | HDAC7   |
| HDAC7    | CA11    | MRPS35  |
| MRPS35   | ISOC2   | APPBP2  |
| APPBP2   | EPN1    | CA11    |
| CA11     | CD22    | ISOC2   |
| ISOC2    | GSC2    | EPN1    |
| EPN1     | ZFY     | CD22    |
| CD22     | HDHD5   | GSC2    |
| GSC2     | KCNQ1   | ZFY     |
| ZFY      | TRPM5   | HDHD5   |
| HDHD5    | TRIB2   | KCNQ1   |
| KCNQ1    | OTUD5   | TRPM5   |
| TRPM5    | GPKOW   | TRIB2   |
| TRIB2    | AQR     | OTUD5   |

|            |            |            |
|------------|------------|------------|
| OTUD5      | KLK13      | GPKOW      |
| GPKOW      | ST6GALNAC1 | AQR        |
| AQR        | MBD3       | KLK13      |
| KLK13      | LMCD1      | ST6GALNAC1 |
| ST6GALNAC1 | PSMC4      | MBD3       |
| MBD3       | FNDC8      | LMCD1      |
| LMCD1      | CAMKK1     | PSMC4      |
| PSMC4      | DERL2      | FNDC8      |
| FNDC8      | NOX3       | CAMKK1     |
| CAMKK1     | ANO8       | ACAP1      |
| ACAP1      | KDM4B      | DERL2      |
| DERL2      | PANX2      | NOX3       |
| NOX3       | CAMSAP3    | ANO8       |
| ANO8       | CTTNBP2    | KDM4B      |
| KDM4B      | ACTL6B     | PANX2      |
| PANX2      | CIC        | ICAM3      |
| ICAM3      | KIF22      | CAMSAP3    |
| CAMSAP3    | PRSS22     | CTTNBP2    |
| CTTNBP2    | CEACAM1    | ACTL6B     |
| ACTL6B     | YTHDC2     | CIC        |
| CIC        | TMEM161A   | KIF22      |
| KIF22      | BCAR1      | PRSS22     |
| PRSS22     | FOXJ2      | CEACAM1    |
| CEACAM1    | TNFRSF1A   | YTHDC2     |
| YTHDC2     | GOLGA5     | TMEM161A   |
| TMEM161A   | METTL22    | BCAR1      |
| BCAR1      | CELSR3     | FOXJ2      |
| FOXJ2      | PPP2R5B    | TNFRSF1A   |
| TNFRSF1A   | PYGM       | GOLGA5     |
| GOLGA5     | BCL3       | METTL22    |
| METTL22    | KCNAB2     | CELSR3     |
| CELSR3     | PIGB       | PPP2R5B    |
| PPP2R5B    | PDZD4      | PYGM       |
| PYGM       | REEP1      | BCL3       |
| BCL3       | FSTL3      | KCNAB2     |
| KCNAB2     | EPHA8      | PIGB       |
| PIGB       | TRIP13     | PDZD4      |
| PDZD4      | P4HA2      | REEP1      |
| REEP1      | VASH1      | FSTL3      |
| FSTL3      | PDCD2      | EPHA8      |
| EPHA8      | LLGL2      | TRIP13     |
| TRIP13     | KRT14      | P4HA2      |
| P4HA2      | KRT20      | VASH1      |
| VASH1      | ARHGEF10L  | PDCD2      |

|           |          |           |
|-----------|----------|-----------|
| PDCD2     | SPP2     | LLGL2     |
| LLGL2     | HSD17B10 | KRT14     |
| KRT14     | FGF4     | KRT20     |
| KRT20     | RGS11    | ARHGEF10L |
| ARHGEF10L | NMRK2    | SPP2      |
| SPP2      | MASP1    | HSD17B10  |
| HSD17B10  | ST6GAL1  | FGF4      |
| FGF4      | TIMM21   | RGS11     |
| RGS11     | BPIFB2   | NMRK2     |
| NMRK2     | REXO1    | MASP1     |
| MASP1     | MKRN2    | ST6GAL1   |
| ST6GAL1   | GPATCH1  | TIMM21    |
| TIMM21    | IL4R     | BPIFB2    |
| BPIFB2    | KEAP1    | REXO1     |
| REXO1     | P2RY10   | MKRN2     |
| MKRN2     | TNS1     | GPATCH1   |
| GPATCH1   | NGFR     | IL4R      |
| IL4R      | NEB      | KEAP1     |
| KEAP1     | NTN1     | P2RY10    |
| P2RY10    | ISOC1    | TNS1      |
| TNS1      | TRO      | NGFR      |
| NGFR      | MNT      | NEB       |
| NEB       | AP3M2    | NTN1      |
| NTN1      | LAPTM4A  | ISOC1     |
| ISOC1     | ADAM7    | TRO       |
| TRO       | ASNS     | MNT       |
| MNT       | PTPN18   | AP3M2     |
| AP3M2     | DRD4     | LAPTM4A   |
| LAPTM4A   | ALDH3A2  | ADAM7     |
| ADAM7     | STK10    | ASNS      |
| ASNS      | ALPK1    | PTPN18    |
| PTPN18    | TBX21    | DRD4      |
| DRD4      | MRPS34   | SCT       |
| SCT       | CA12     | ALDH3A2   |
| ALDH3A2   | MAP2K5   | STK10     |
| STK10     | TIGAR    | ALPK1     |
| ALPK1     | FGF20    | TBX21     |
| TBX21     | MTMR7    | MRPS34    |
| MRPS34    | CPB2     | CA12      |
| CA12      | FAM107B  | MAP2K5    |
| MAP2K5    | CDK13    | TIGAR     |
| TIGAR     | TSPAN32  | FGF20     |
| FGF20     | FAR2     | MTMR7     |
| MTMR7     | TRAM2    | CPB2      |

|          |          |          |
|----------|----------|----------|
| CPB2     | CLDN18   | FAM107B  |
| FAM107B  | ROPN1    | CDK13    |
| CDK13    | NDUFB4   | TSPAN32  |
| TSPAN32  | HEATR6   | FAR2     |
| FAR2     | ERLEC1   | TRAM2    |
| TRAM2    | CLIC5    | CLDN18   |
| CLDN18   | TMEM131  | ROPN1    |
| ROPN1    | ARPP21   | NDUFB4   |
| NDUFB4   | CEACAM21 | HEATR6   |
| HEATR6   | TMEM38A  | ERLEC1   |
| ERLEC1   | PVR      | CLIC5    |
| CLIC5    | PSG6     | TMEM131  |
| TMEM131  | ACTR6    | ARPP21   |
| ARPP21   | SLC25A3  | CEACAM21 |
| CEACAM21 | NR1H4    | TMEM38A  |
| TMEM38A  | FAP      | PVR      |
| PVR      | NFKB2    | PSG6     |
| ZNF222   | DMRT3    | ACTR6    |
| PSG6     | OSBPL6   | SLC25A3  |
| ACTR6    | CCN5     | NR1H4    |
| SLC25A3  | CTSA     | FAP      |
| NR1H4    | UHRF1BP1 | NFKB2    |
| FAP      | OSTM1    | DMRT3    |
| NFKB2    | IMPG2    | OSBPL6   |
| DMRT3    | ACTN1    | CCN5     |
| OSBPL6   | NAIP     | CTSA     |
| CCN5     | DELE1    | ANKRD16  |
| CTSA     | SLC13A1  | GAL3ST2  |
| ANKRD16  | PCDHB4   | UHRF1BP1 |
| GAL3ST2  | PCDHB2   | OSTM1    |
| UHRF1BP1 | HSPB11   | IMPG2    |
| OSTM1    | STRADB   | ACTN1    |
| IMPG2    | FAM135A  | NAIP     |
| ACTN1    | DLG3     | DELE1    |
| NAIP     | SEMA5B   | SLC13A1  |
| DELE1    | SNAP91   | PCDHB4   |
| SLC13A1  | PLOD1    | PCDHB2   |
| PCDHB4   | TDRD3    | HSPB11   |
| PCDHB2   | OXCT1    | STRADB   |
| HSPB11   | ZNF324   | FAM135A  |
| STRADB   | ZNF416   | DLG3     |
| FAM135A  | RPS5     | SEMA5B   |
| DLG3     | FAM234B  | SNAP91   |
| SEMA5B   | PILRA    | PLOD1    |

|          |          |          |
|----------|----------|----------|
| SNAP91   | RRN3     | TDRD3    |
| PLOD1    | MOGAT2   | OXCT1    |
| TDRD3    | CHERP    | ZNF324   |
| OXCT1    | AQP2     | ZNF416   |
| ZNF324   | DIMT1    | RPS5     |
| ZNF416   | EIF2AK1  | FAM234B  |
| RPS5     | NME8     | PILRA    |
| FAM234B  | EPDR1    | RRN3     |
| PILRA    | MRPL28   | MOGAT2   |
| RRN3     | CEACAM6  | CHERP    |
| MOGAT2   | RBM22    | AQP2     |
| CHERP    | MAP2     | DIMT1    |
| AQP2     | ZW10     | EIF2AK1  |
| DIMT1    | ITGB4    | NME8     |
| EIF2AK1  | TRIP6    | EPDR1    |
| NME8     | ADAM11   | MRPL28   |
| EPDR1    | LAMP2    | HBQ1     |
| MRPL28   | SLC22A4  | CEACAM6  |
| HBQ1     | CETP     | RBM22    |
| CEACAM6  | MT3      | HSD17B2  |
| RBM22    | PTHLH    | MAP2     |
| HSD17B2  | TFAP2C   | ZW10     |
| MAP2     | EPS8L1   | ITGB4    |
| ZW10     | NOL4L    | TRIP6    |
| ITGB4    | DNMT3B   | ADAM11   |
| TRIP6    | REM1     | LAMP2    |
| ADAM11   | PDRG1    | SLC22A4  |
| LAMP2    | EPB41L1  | CETP     |
| SLC22A4  | PPP1R13B | MT3      |
| CETP     | RALGAPA2 | PTHLH    |
| MT3      | ESF1     | TFAP2C   |
| PTHLH    | SLC8B1   | EPS8L1   |
| TFAP2C   | TMEM230  | NOL4L    |
| EPS8L1   | OAS1     | DNMT3B   |
| NOL4L    | SIRT4    | REM1     |
| DNMT3B   | TRMT6    | PDRG1    |
| REM1     | HAUS5    | EPB41L1  |
| PDRG1    | UQCRC1   | PPP1R13B |
| EPB41L1  | GMIP     | TGM6     |
| PPP1R13B | LAG3     | RALGAPA2 |
| TGM6     | MLF2     | ESF1     |
| RALGAPA2 | OTUB2    | SLC8B1   |
| ESF1     | LTBP4    | TMEM230  |
| SLC8B1   | TFAP4    | OAS1     |

|         |         |         |
|---------|---------|---------|
| TMEM230 | PDCD7   | SIRT4   |
| OAS1    | SPG21   | TRMT6   |
| SIRT4   | CHR1    | HAUS5   |
| TRMT6   | FLT3LG  | UQCRC1  |
| HAUS5   | GNPTG   | GMIP    |
| UQCRC1  | GOLGA3  | LAG3    |
| GMIP    | EFNB1   | MLF2    |
| LAG3    | GLG1    | OTUB2   |
| MLF2    | PLEKHG2 | LTBP4   |
| OTUB2   | DLL3    | TFAP4   |
| LTBP4   | NAT14   | PDCD7   |
| TFAP4   | AASDH   | SPG21   |
| PDCD7   | LAMB4   | CHR1    |
| SPG21   | DLD     | FLT3LG  |
| CHR1    | ABCC6   | GNPTG   |
| FLT3LG  | CMTM6   | GOLGA3  |
| GNPTG   | APOH    | EFNB1   |
| GOLGA3  | SPAG7   | GLG1    |
| EFNB1   | ESR1    | PLEKHG2 |
| GLG1    | RGS17   | DLL3    |
| PLEKHG2 | TMEM101 | NAT14   |
| DLL3    | CCDC80  | AASDH   |
| NAT14   | PSME1   | LAMB4   |
| AASDH   | HAUS4   | DLD     |
| LAMB4   | CEBPE   | ABCC6   |
| DLD     | OSGEP   | CMTM6   |
| ABCC6   | G2E3    | APOH    |
| CMTM6   | TGM1    | SPAG7   |
| APOH    | TBX15   | ESR1    |
| SPAG7   | UNC13D  | RGS17   |
| ESR1    | COMT    | TMEM101 |
| RGS17   | XYLB    | CCDC80  |
| TMEM101 | ADH7    | PSME1   |
| CCDC80  | ADH1A   | HAUS4   |
| PSME1   | KRT23   | CEBPE   |
| HAUS4   | CDC6    | OSGEP   |
| CEBPE   | CBX5    | G2E3    |
| OSGEP   | KLHL20  | TGM1    |
| G2E3    | FMO2    | TBX15   |
| TGM1    | DHPS    | TEKT2   |
| TBX15   | RAB26   | UNC13D  |
| TEKT2   | PSMD5   | COMT    |
| UNC13D  | SEMA4G  | XYLB    |
| COMT    | TPSD1   | OR111   |

|         |          |         |
|---------|----------|---------|
| XYLB    | GSTA3    | ADH7    |
| OR11I   | MAPK13   | ADH1A   |
| ADH7    | TMEM14A  | KRT23   |
| ADH1A   | BAG6     | CDC6    |
| KRT23   | PRRT1    | CBX5    |
| CDC6    | LST1     | KLHL20  |
| CBX5    | ZNF184   | FMO2    |
| KLHL20  | VCL      | DHPS    |
| FMO2    | SIRT1    | RAB26   |
| DHPS    | TGFBR3   | PSMD5   |
| RAB26   | TMED1    | SEMA4G  |
| PSMD5   | MZF1     | TPSD1   |
| SEMA4G  | OCEL1    | MAPK13  |
| TPSD1   | PSMD8    | TMEM14A |
| GSTA3   | STX1B    | BAG6    |
| MAPK13  | EFNA2    | PRRT1   |
| TMEM14A | PCDH11Y  | LST1    |
| BAG6    | AMELY    | ZNF184  |
| PRRT1   | FGF22    | VCL     |
| LST1    | SMIM24   | SIRT1   |
| ZNF184  | MARCHF2  | TGFBR3  |
| VCL     | NDUFB7   | TMED1   |
| SIRT1   | TECR     | MZF1    |
| TGFBR3  | TIMM13   | OCEL1   |
| TMED1   | CDC34    | PSMD8   |
| MZF1    | MISP     | STX1B   |
| OCEL1   | POLR2E   | BCL7C   |
| PSMD8   | GADD45B  | EFNA2   |
| STX1B   | MADCAM1  | ATP5F1D |
| BCL7C   | MAPK12   | PCDH11Y |
| EFNA2   | SERPIND1 | AMELY   |
| ATP5F1D | SNAP29   | FGF22   |
| PCDH11Y | THAP7    | SMIM24  |
| AMELY   | MMP11    | IGFALS  |
| FGF22   | MIF      | MARCHF2 |
| SMIM24  | DDTL     | NDUFB7  |
| IGFALS  | OSM      | TECR    |
| MARCHF2 | TBC1D10A | TIMM13  |
| NDUFB7  | SF3A1    | CDC34   |
| TECR    | USP18    | MISP    |
| TIMM13  | RNF215   | POLR2E  |
| CDC34   | SEC14L3  | GADD45B |
| MISP    | SNRPD3   | MADCAM1 |
| POLR2E  | MAPK1    | MAPK12  |

|          |          |          |
|----------|----------|----------|
| GADD45B  | TCN2     | SERPIND1 |
| MADCAM1  | CRYBB3   | SNAP29   |
| MAPK12   | MORC2    | THAP7    |
| SERPIND1 | SLC25A1  | MMP11    |
| SNAP29   | PLA2G3   | MIF      |
| THAP7    | PDXP     | DDTL     |
| MMP11    | ASPHD2   | OSM      |
| MIF      | LGALS1   | TBC1D10A |
| DDTL     | PIK3IP1  | SF3A1    |
| OSM      | SRRD     | USP18    |
| TBC1D10A | PATZ1    | RNF215   |
| SF3A1    | ANKRD54  | SEC14L3  |
| USP18    | SNU13    | SNRPD3   |
| RNF215   | MICALL1  | MAPK1    |
| SEC14L3  | CENPM    | TCN2     |
| SNRPD3   | KDEL3    | CRYBB3   |
| MAPK1    | DMC1     | MORC2    |
| TCN2     | HSCB     | SLC25A1  |
| CRYBB3   | CBY1     | PLA2G3   |
| MORC2    | TOMM22   | PDXP     |
| SLC25A1  | XBP1     | ASPHD2   |
| PLA2G3   | RTCB     | LGALS1   |
| PDXP     | JOSD1    | PIK3IP1  |
| ASPHD2   | GTPBP1   | SRRD     |
| LGALS1   | PPP6R2   | PATZ1    |
| PIK3IP1  | DNAL4    | ANKRD54  |
| SRRD     | C22orf31 | SNU13    |
| PATZ1    | MIOX     | MICALL1  |
| ANKRD54  | LMF2     | CENPM    |
| SNU13    | CBX6     | KDEL3    |
| MICALL1  | RHBDD3   | DMC1     |
| CENPM    | APOBEC3D | HSCB     |
| KDEL3    | RASL10A  | CBY1     |
| DMC1     | HMGXB4   | TOMM22   |
| HSCB     | BIK      | RSPH14   |
| CBY1     | HMOX1    | XBP1     |
| TOMM22   | NIPSNAP1 | RTCB     |
| RSPH14   | MCM5     | JOSD1    |
| XBP1     | ARSA     | GTPBP1   |
| RTCB     | RASD2    | PPP6R2   |
| JOSD1    | TTLL12   | DNAL4    |
| GTPBP1   | CBX7     | C22orf31 |
| PPP6R2   | ACR      | MIOX     |
| DNAL4    | CABP7    | LMF2     |



|          |          |          |
|----------|----------|----------|
| C22orf31 | RPL3     | CBX6     |
| MIOX     | SYNGR1   | RHBDD3   |
| LMF2     | TAB1     | APOBEC3D |
| CBX6     | PNPLA5   | RASL10A  |
| RHBDD3   | PNPLA3   | HMGXB4   |
| APOBEC3D | MYH9     | BIK      |
| RASL10A  | TXN2     | HMOX1    |
| HMGXB4   | FOXRED2  | NIPSNAP1 |
| BIK      | EIF3D    | MCM5     |
| HMOX1    | PVALB    | ARSA     |
| NIPSNAP1 | UPK3A    | RASD2    |
| MCM5     | FAM118A  | TTL12    |
| ARSA     | ST13     | CBX7     |
| RASD2    | IL2RB    | ACR      |
| TTL12    | RBX1     | CABP7    |
| CBX7     | L3MBTL2  | RPL3     |
| ACR      | CHADL    | SYNGR1   |
| CABP7    | PHF5A    | TAB1     |
| RPL3     | ACO2     | PNPLA5   |
| SYNGR1   | PMM1     | PNPLA3   |
| TAB1     | CERK     | MYH9     |
| PNPLA5   | BRD1     | TXN2     |
| PNPLA3   | ZBED4    | FOXRED2  |
| MYH9     | HDAC10   | EIF3D    |
| TXN2     | RIPK3    | ADSL     |
| FOXRED2  | PAPOLA   | PVALB    |
| EIF3D    | HSP90AA1 | UPK3A    |
| ADSL     | NID2     | FAM118A  |
| PVALB    | MARK3    | ST13     |
| UPK3A    | SNAPC1   | IL2RB    |
| FAM118A  | SUPT16H  | RBX1     |
| ST13     | ABHD4    | L3MBTL2  |
| IL2RB    | FKBP3    | CHADL    |
| RBX1     | GZMH     | PHF5A    |
| L3MBTL2  | GZMB     | ACO2     |
| CHADL    | PRMT5    | PMM1     |
| PHF5A    | COCH     | CERK     |
| ACO2     | AP4S1    | BRD1     |
| PMM1     | POLE2    | ZBED4    |
| CERK     | SOS2     | HDAC10   |
| BRD1     | CDKL1    | RIPK3    |
| ZBED4    | PYGL     | PAPOLA   |
| HDAC10   | GNPNAT1  | HSP90AA1 |
| RIPK3    | CNIH1    | NID2     |

|          |         |         |
|----------|---------|---------|
| PAPOLA   | CGRRF1  | MARK3   |
| HSP90AA1 | ATP6V1D | SNAPC1  |
| NID2     | CCDC198 | SUPT16H |
| MARK3    | PLEK2   | ABHD4   |
| SNAPC1   | LRRC74A | FKBP3   |
| SUPT16H  | PIGH    | CTSG    |
| ABHD4    | PSMA3   | GZMH    |
| FKBP3    | VTI1B   | GZMB    |
| CTSG     | GSTZ1   | PRMT5   |
| GZMH     | TMED8   | COCH    |
| GZMB     | SAMD15  | AP4S1   |
| PRMT5    | AHSA1   | POLE2   |
| COCH     | ISM2    | SOS2    |
| AP4S1    | SPTLC2  | CDKL1   |
| POLE2    | RIN3    | PYGL    |
| SOS2     | ALKBH1  | GNPNAT1 |
| CDKL1    | CHGA    | CNIH1   |
| PYGL     | DHRS7   | CGRRF1  |
| GNPNAT1  | SIX4    | ATP6V1D |
| CNIH1    | SLC10A1 | CCDC198 |
| CGRRF1   | EIF5    | PLEK2   |
| ATP6V1D  | SLC8A3  | LRRC74A |
| CCDC198  | ZFYVE21 | PIGH    |
| PLEK2    | VRK1    | PSMA3   |
| LRRC74A  | PAPLN   | VTI1B   |
| PIGH     | APEX1   | GSTZ1   |
| PSMA3    | PABPN1  | TMED8   |
| VTI1B    | EFS     | SAMD15  |
| GSTZ1    | CINP    | AHSA1   |
| TMED8    | SRP54   | ISM2    |
| SAMD15   | PCK2    | SPTLC2  |
| AHSA1    | NFKBIA  | RIN3    |
| ISM2     | BRMS1L  | ALKBH1  |
| SPTLC2   | PNN     | CHGA    |
| RIN3     | CYP24A1 | DHRS7   |
| ALKBH1   | PTPRA   | SIX4    |
| CHGA     | NSFL1C  | SLC10A1 |
| DHRS7    | ZFP64   | EIF5    |
| SIX4     | PYGB    | SLC8A3  |
| SLC10A1  | PROCR   | ZFYVE21 |
| EIF5     | MYBL2   | VRK1    |
| SLC8A3   | R3HDML  | PAPLN   |
| ZFYVE21  | PABPC1L | APEX1   |
| VRK1     | SALL4   | PABPN1  |

|          |          |          |
|----------|----------|----------|
| PAPLN    | CSTF1    | EFS      |
| APEX1    | TPD52L2  | CINP     |
| PABPN1   | CTSZ     | SRP54    |
| EFS      | TUBB1    | PCK2     |
| CINP     | SLCO4A1  | NFKBIA   |
| SRP54    | TCFL5    | EMC9     |
| PCK2     | BIRC7    | BRMS1L   |
| NFKBIA   | UBOX5    | PNN      |
| EMC9     | EEF1A2   | RABGGTA  |
| PSME2    | PTK6     | CYP24A1  |
| BRMS1L   | C20orf27 | PTPRA    |
| PNN      | TRIB3    | NSFL1C   |
| RABGGTA  | CSNK2A1  | ZFP64    |
| CYP24A1  | MACROD2  | PYGB     |
| PTPRA    | SLC52A3  | PROCR    |
| NSFL1C   | RSPO4    | MYBL2    |
| ZFP64    | FERMT1   | R3HDML   |
| PYGB     | PDYN     | PABPC1L  |
| PROCR    | TM9SF4   | SALL4    |
| MYBL2    | TLDC2    | CSTF1    |
| R3HDML   | SNTA1    | TPD52L2  |
| PABPC1L  | OXT      | CTSZ     |
| SALL4    | PXMP4    | TUBB1    |
| CSTF1    | CHMP4B   | SLCO4A1  |
| TPD52L2  | LBP      | TCFL5    |
| CTSZ     | SLC32A1  | BIRC7    |
| TUBB1    | CST4     | UBOX5    |
| SLCO4A1  | AHCY     | EEF1A2   |
| TCFL5    | SPINT3   | PTK6     |
| BIRC7    | PIGU     | C20orf27 |
| UBOX5    | ACOT8    | TRIB3    |
| EEF1A2   | APMAP    | CSNK2A1  |
| PTK6     | TXNL1    | MACROD2  |
| C20orf27 | MYL12A   | SLC52A3  |
| TRIB3    | RNF125   | RSPO4    |
| CSNK2A1  | POLI     | FERMT1   |
| MACROD2  | NOX1     | PDYN     |
| SLC52A3  | TAF9     | TM9SF4   |
| RSPO4    | IDH3G    | TLDC2    |
| FERMT1   | SLC25A43 | SNTA1    |
| PDYN     | H2BW1    | OXT      |
| TM9SF4   | MXRA5    | PXMP4    |
| TLDC2    | VSIG1    | CHMP4B   |
| SNTA1    | PSMD10   | LBP      |

|          |          |          |
|----------|----------|----------|
| OXT      | STS      | SLC32A1  |
| PXMP4    | PGRMC1   | CST4     |
| CHMP4B   | RHOXF1   | AHCY     |
| LBP      | NXT2     | SPINT3   |
| SLC32A1  | ATP1B4   | PIGU     |
| CST4     | TLR8     | ACOT8    |
| AHCY     | WDR13    | APMAP    |
| SPINT3   | PAGE4    | TXNL1    |
| PIGU     | GLRA2    | MYL12A   |
| ACOT8    | STAG2    | RNF125   |
| APMAP    | F9       | POLI     |
| TXNL1    | ABCD1    | NOX1     |
| MYL12A   | BCORL1   | TAF9     |
| RNF125   | KCND1    | IDH3G    |
| POLI     | SLC25A14 | SLC25A43 |
| NOX1     | FMR1     | H2BW1    |
| TAF9     | PQBP1    | MXRA5    |
| IDH3G    | PCSK1N   | VSIG1    |
| SLC25A43 | RAB40AL  | PSMD10   |
| H2BW1    | RP2      | STS      |
| MXRA5    | USP11    | PGRMC1   |
| VSIG1    | HTATSF1  | RHOXF1   |
| PSMD10   | TIMP1    | NXT2     |
| STS      | PIN4     | GUCY2F   |
| PGRMC1   | ITIH6    | ATP1B4   |
| RHOXF1   | ATP12A   | TLR8     |
| NXT2     | NDFIP2   | WDR13    |
| GUCY2F   | ACP5     | PAGE4    |
| ATP1B4   | ARHGEF7  | GLRA2    |
| TLR8     | SGCG     | STAG2    |
| WDR13    | DHRS12   | F9       |
| PAGE4    | OLFM4    | ABCD1    |
| GLRA2    | ACSM2A   | BCORL1   |
| STAG2    | NTHL1    | KCND1    |
| F9       | ZNF263   | SLC25A14 |
| ABCD1    | MMP2     | FMR1     |
| BCORL1   | ZNF205   | PQBP1    |
| KCND1    | ORC6     | PCSK1N   |
| SLC25A14 | C16orf70 | RAB40AL  |
| FMR1     | CORO1A   | RP2      |
| PQBP1    | LYRM1    | USP11    |
| PCSK1N   | NUTF2    | HTATSF1  |
| RAB40AL  | CBLN1    | TIMP1    |
| RP2      | ARL2BP   | PIN4     |

|          |         |          |
|----------|---------|----------|
| USP11    | PLLP    | ITIH6    |
| HTATSF1  | CCL22   | ATP12A   |
| TIMP1    | DHODH   | NDFIP2   |
| PIN4     | CCL17   | ACP5     |
| ITIH6    | ACD     | ARHGEF7  |
| ATP12A   | POLR2C  | SGCG     |
| NDFIP2   | PARD6A  | DHRS12   |
| ACP5     | MMP15   | OLFM4    |
| ARHGEF7  | USB1    | ACSM2A   |
| SGCG     | CCDC113 | NTHL1    |
| DHRS12   | PRSS54  | ZNF263   |
| OLFM4    | NME3    | MMP2     |
| ACSM2A   | PSMD7   | ZNF205   |
| NTHL1    | SETD6   | ORC6     |
| ZNF263   | SLC38A7 | C16orf70 |
| MMP2     | HAS3    | CORO1A   |
| ZNF205   | SMPD3   | LYRM1    |
| ORC6     | SLC7A6  | NUTF2    |
| C16orf70 | PLA2G15 | CBLN1    |
| CORO1A   | FA2H    | ARL2BP   |
| LYRM1    | CMC2    | PLLP     |
| NUTF2    | PDIA2   | CCL22    |
| CBLN1    | ARHGDIG | DHODH    |
| ARL2BP   | HSDL1   | CCL17    |
| PLLP     | WFDC1   | ACD      |
| CCL22    | USP10   | POLR2C   |
| DHODH    | TSC2    | PARD6A   |
| CCL17    | ZNF500  | MMP15    |
| ACD      | NME4    | USB1     |
| POLR2C   | DECR2   | CCDC113  |
| PARD6A   | METRN   | PRSS54   |
| MMP15    | STUB1   | NME3     |
| USB1     | RHBDL1  | PSMD7    |
| CCDC113  | MEFV    | SETD6    |
| PRSS54   | CRYM    | SLC38A7  |
| NME3     | CAPN15  | HAS3     |
| PSMD7    | AQP8    | SMPD3    |
| SETD6    | USP31   | SLC7A6   |
| SLC38A7  | HMOX2   | PLA2G15  |
| HAS3     | TOX3    | FA2H     |
| SMPD3    | MAZ     | CMC2     |
| SLC7A6   | CDIPT   | PDIA2    |
| PLA2G15  | BCKDK   | ARHGDIG  |
| FA2H     | TMC5    | MPG      |

|         |         |         |
|---------|---------|---------|
| CMC2    | SLC6A2  | HSDL1   |
| PDIA2   | KNOP1   | WFDC1   |
| ARHGDIG | MGA     | USP10   |
| MPG     | AQP9    | TSC2    |
| HSDL1   | CSK     | ZNF500  |
| WFDC1   | MTFMT   | NME4    |
| USP10   | RASL12  | DECR2   |
| TSC2    | CTSH    | METRN   |
| ZNF500  | CEMIP   | STUB1   |
| NME4    | EHD4    | RHBDL1  |
| DECR2   | TGM5    | MEFV    |
| METRN   | GABPB1  | CRYM    |
| STUB1   | SCG3    | CAPN15  |
| RHBDL1  | DNAJC17 | AQP8    |
| MEFV    | RHOV    | USP31   |
| CRYM    | VPS18   | HMOX2   |
| CAPN15  | OIP5    | TOX3    |
| AQP8    | BLOC1S6 | MAZ     |
| USP31   | EXTL3   | CDIPT   |
| HMOX2   | FDFT1   | BCKDK   |
| TOX3    | AGO2    | KAT8    |
| MAZ     | PAG1    | TMC5    |
| CDIPT   | TG      | SLC6A2  |
| BCKDK   | BRF2    | KNOP1   |
| KAT8    | ZFAND1  | MGA     |
| TMC5    | RP1     | AQP9    |
| SLC6A2  | RIPK2   | CSK     |
| KNOP1   | CPQ     | MTFMT   |
| MGA     | DECR1   | RASL12  |
| AQP9    | SFRP1   | CTSH    |
| CSK     | PLAT    | CEMIP   |
| MTFMT   | GDAP1   | EHD4    |
| RASL12  | EIF3E   | TGM5    |
| CTSH    | EMC2    | GABPB1  |
| CEMIP   | CCN4    | SCG3    |
| EHD4    | STMN2   | DNAJC17 |
| TGM5    | TRPS1   | RHOV    |
| GABPB1  | CHRA1   | VPS18   |
| SCG3    | NCALD   | OIP5    |
| DNAJC17 | GML     | BLOC1S6 |
| RHOV    | UBR5    | EXTL3   |
| VPS18   | PYCR3   | FDFT1   |
| OIP5    | MTMR9   | AGO2    |
| BLOC1S6 | DCTN6   | PAG1    |

|           |           |           |
|-----------|-----------|-----------|
| EXTL3     | GSR       | TG        |
| FDFT1     | TNFRSF10A | BRF2      |
| AGO2      | PPP2CB    | ZFAND1    |
| PAG1      | NEFM      | RP1       |
| TG        | KCTD9     | RIPK2     |
| BRF2      | HOMER3    | CPQ       |
| ZFAND1    | CNOT3     | DECR1     |
| RP1       | EXOSC5    | SFRP1     |
| RIPK2     | PNPLA6    | PLAT      |
| CPQ       | PLAUR     | GDAP1     |
| DECR1     | PAF1      | EIF3E     |
| SFRP1     | CYP4F3    | EMC2      |
| PLAT      | ZNF432    | CCN4      |
| GDAP1     | ZNF180    | STMN2     |
| EIF3E     | ZNF780B   | TRPS1     |
| EMC2      | MAN2B1    | CHRAC1    |
| CCN4      | TULP2     | NCALD     |
| STMN2     | RUVBL2    | GML       |
| TRPS1     | ECH1      | UBR5      |
| CHRAC1    | HNRNPL    | PYCR3     |
| NCALD     | SARS2     | MTMR9     |
| GML       | KCNA7     | DCTN6     |
| UBR5      | SNRNP70   | GSR       |
| PYCR3     | RELB      | TNFRSF10A |
| MTMR9     | CLASRP    | PPP2CB    |
| DCTN6     | LIN7B     | NEFM      |
| GSR       | PPP1R37   | KCTD9     |
| TNFRSF10A | FCGRT     | HOMER3    |
| PPP2CB    | CKM       | CNOT3     |
| NEFM      | PEX11G    | EXOSC5    |
| KCTD9     | SLC17A7   | PNPLA6    |
| HOMER3    | RNASEH2A  | PLAUR     |
| CNOT3     | SF3A2     | PAF1      |
| EXOSC5    | DKKL1     | STXBP2    |
| PNPLA6    | RSPH6A    | CYP4F3    |
| PLAUR     | TBC1D17   | ZNF432    |
| PAF1      | CCDC130   | ZNF180    |
| STXBP2    | TLE5      | ZNF780B   |
| CYP4F3    | SGTA      | MAN2B1    |
| ZNF432    | SNAPC2    | TULP2     |
| ZNF180    | C19orf53  | RUVBL2    |
| ZNF780B   | FIZ1      | ECH1      |
| MAN2B1    | C19orf44  | HNRNPL    |
| TULP2     | EPHX3     | SARS2     |

|          |         |          |
|----------|---------|----------|
| RUVBL2   | ZNF419  | KCNA7    |
| ECH1     | POP4    | SNRNP70  |
| HNRNPL   | PDCD5   | RELB     |
| SARS2    | LGALS13 | CLASRP   |
| KCNA7    | CLC     | LIN7B    |
| SNRNP70  | CCNP    | PPP1R37  |
| RELB     | EBI3    | FCGRT    |
| CLASRP   | TBCB    | CKM      |
| LIN7B    | FSD1    | PEX11G   |
| PPP1R37  | APLP1   | SLC17A7  |
| FCGRT    | CACTIN  | RNASEH2A |
| CKM      | CCDC9   | SF3A2    |
| PEX11G   | TGFB1   | AMH      |
| SLC17A7  | DMAC2   | DKKL1    |
| RNASEH2A | CEACAM4 | RETN     |
| SF3A2    | PLIN3   | RSPH6A   |
| AMH      | CD79A   | TBC1D17  |
| DKKL1    | LIM2    | CCDC130  |
| RETN     | NKG7    | TLE5     |
| RSPH6A   | ICAM5   | SGTA     |
| TBC1D17  | CEACAM5 | SNAPC2   |
| CCDC130  | CRX     | C19orf53 |
| TLE5     | SULT2A1 | FIZ1     |
| SGTA     | CDC37   | C19orf44 |
| SNAPC2   | RABAC1  | EPHX3    |
| C19orf53 | CNFN    | ZNF419   |
| FIZ1     | ZNRF4   | POP4     |
| C19orf44 | HAS1    | PDCD5    |
| EPHX3    | RAB3D   | LGALS13  |
| ZNF419   | DBP     | FBL      |
| POP4     | EPOR    | CLC      |
| PDCD5    | RASIP1  | CCNP     |
| LGALS13  | FGF21   | EBI3     |
| FBL      | WDR83OS | TBCB     |
| CLC      | CACNG7  | FSD1     |
| CCNP     | GCDH    | APLP1    |
| EBI3     | DNASE2  | CACTIN   |
| TBCB     | LENG1   | CCDC9    |
| FSD1     | SLC5A5  | TGFB1    |
| APLP1    | KCNN1   | DMAC2    |
| CACTIN   | ARRDC2  | CEACAM4  |
| CCDC9    | PIK3R2  | PLIN3    |
| TGFB1    | RAB3A   | CD79A    |
| DMAC2    | PSENEN  | LIM2     |



|         |             |             |
|---------|-------------|-------------|
| CEACAM4 | COMP        | NKG7        |
| PLIN3   | UPK1A       | ICAM5       |
| CD79A   | TMEM147     | CEACAM5     |
| LIM2    | HAMP        | CRX         |
| NKG7    | USF2        | SULT2A1     |
| ICAM5   | KXD1        | CDC37       |
| CEACAM5 | FKBP8       | RABAC1      |
| CRX     | ERF         | CNFN        |
| SULT2A1 | GSK3A       | ZNRF4       |
| CDC37   | ZNF574      | HAS1        |
| RABAC1  | SIPA1L3     | RAB3D       |
| CNFN    | CADM4       | DBP         |
| ZNRF4   | PON1        | EPOR        |
| HAS1    | ABCF2-H2BE1 | RASIP1      |
| RAB3D   | HGF         | FGF21       |
| DBP     | LAMB1       | WDR83OS     |
| EPOR    | UBE2D4      | CACNG7      |
| RASIP1  | WNT16       | GCDH        |
| FGF21   | CPA4        | DNASE2      |
| WDR83OS | GTPBP10     | LENG1       |
| CACNG7  | TFPI2       | RPL18A      |
| GCDH    | BET1        | SLC5A5      |
| DNASE2  | NAMPT       | KCNN1       |
| LENG1   | TWISTNB     | ARRDC2      |
| RPL18A  | PON2        | PIK3R2      |
| SLC5A5  | ITGB8       | RAB3A       |
| KCNN1   | HBP1        | PSENE1      |
| ARRDC2  | SP4         | COMP        |
| PIK3R2  | CBLL1       | UPK1A       |
| RAB3A   | MPP6        | TMEM147     |
| PSENE1  | OGDH        | GAPDHS      |
| COMP    | NPVF        | HAMP        |
| UPK1A   | H2AZ2       | USF2        |
| TMEM147 | CAV2        | KXD1        |
| GAPDHS  | HOXA2       | FKBP8       |
| HAMP    | LFNG        | ERF         |
| USF2    | HOXA5       | GSK3A       |
| KXD1    | HOXA6       | ZNF574      |
| FKBP8   | TSPAN12     | SIPA1L3     |
| ERF     | EVX1        | CADM4       |
| GSK3A   | CHN2        | PON1        |
| ZNF574  | ABHD11      | ABCF2-H2BE1 |
| SIPA1L3 | FKBP14      | HGF         |
| CADM4   | STX1A       | LAMB1       |

|             |          |          |
|-------------|----------|----------|
| PON1        | NOD1     | UBE2D4   |
| ABCF2-H2BE1 | CCL24    | WNT16    |
| HGF         | BUD31    | CPA4     |
| LAMB1       | CYP3A5   | GTPBP10  |
| UBE2D4      | SNX8     | TFPI2    |
| WNT16       | WASL     | BET1     |
| CPA4        | HYAL4    | NAMPT    |
| GTPBP10     | SPAM1    | TWISTNB  |
| TFPI2       | AIMP2    | PON2     |
| BET1        | TFR2     | ITGB8    |
| NAMPT       | MOSPD3   | HBP1     |
| TWISTNB     | PCOLCE   | SP4      |
| PON2        | RBM28    | CBLL1    |
| ITGB8       | LSM5     | MPP6     |
| HBP1        | SERPINE1 | OGDH     |
| SP4         | MOGAT3   | NPVF     |
| CBLL1       | C1GALT1  | H2AZ2    |
| MPP6        | PLOD3    | CAV2     |
| OGDH        | RPA3     | HOXA2    |
| NPVF        | FIS1     | LFNG     |
| H2AZ2       | GLCCI1   | HOXA5    |
| CAV2        | MYL10    | HOXA6    |
| HOXA2       | NRF1     | TSPAN12  |
| LFNG        | CEP41    | EVX1     |
| HOXA5       | ZNF862   | CHN2     |
| HOXA6       | MEST     | ABHD11   |
| TSPAN12     | RARRES2  | FKBP14   |
| EVX1        | YAE1     | STX1A    |
| CHN2        | GIMAP2   | NOD1     |
| ABHD11      | PSMA2    | CCL24    |
| FKBP14      | MRPL32   | BUD31    |
| STX1A       | COA1     | CYP3A5   |
| NOD1        | AEBP1    | SNX8     |
| CCL24       | BCL7B    | WASL     |
| BUD31       | YKT6     | HYAL4    |
| CYP3A5      | CLIP2    | SPAM1    |
| SNX8        | PTGS1    | AIMP2    |
| WASL        | ZNF510   | TFR2     |
| HYAL4       | ZNF688   | MOSPD3   |
| SPAM1       | CHMP5    | PCOLCE   |
| AIMP2       | FKTN     | RBM28    |
| TFR2        | PRUNE2   | LSM5     |
| MOSPD3      | SEC61B   | SERPINE1 |
| PCOLCE      | C5       | MOGAT3   |

|          |            |         |
|----------|------------|---------|
| RBM28    | AKNA       | C1GALT1 |
| LSM5     | TNFSF8     | PLOD3   |
| SERPINE1 | RLN1       | RPA3    |
| MOGAT3   | PLGRKT     | FIS1    |
| C1GALT1  | TBC1D13    | GLCCI1  |
| PLOD3    | ELAVL2     | MYL10   |
| RPA3     | EDF1       | NRF1    |
| FIS1     | SETX       | CEP41   |
| GLCCI1   | VIM        | ZNF862  |
| MYL10    | BLNK       | MEST    |
| NRF1     | CYP26A1    | RARRES2 |
| CEP41    | ATE1       | YAE1    |
| ZNF862   | CDH23      | GIMAP2  |
| MEST     | CCSER2     | PSMA2   |
| RARRES2  | ACTA2      | MRPL32  |
| YAE1     | SFXN3      | COA1    |
| GIMAP2   | FBXL15     | AEBP1   |
| PSMA2    | PITRM1     | POLD2   |
| MRPL32   | STN1       | MYL7    |
| COA1     | DNAJC12    | BCL7B   |
| AEBP1    | PPIF       | YKT6    |
| POLD2    | TBC1D12    | CLIP2   |
| MYL7     | MPO        | PTGS1   |
| BCL7B    | ST6GALNAC2 | ZNF510  |
| YKT6     | DHX33      | ZNF688  |
| CLIP2    | UTP18      | CHMP5   |
| PTGS1    | SLC25A39   | FKTN    |
| ZNF510   | P2RX5      | PRUNE2  |
| ZNF688   | EPX        | SEC61B  |
| CHMP5    | CRYBA1     | C5      |
| FKTN     | NUFIP2     | AKNA    |
| PRUNE2   | GIT1       | TNFSF8  |
| SEC61B   | RUNDC3A    | RLN1    |
| C5       | CSF3       | PLGRKT  |
| AKNA     | SUPT4H1    | TBC1D13 |
| TNFSF8   | WNT3       | ELAVL2  |
| RLN1     | SHPK       | EDF1    |
| PLGRKT   | TAX1BP3    | SETX    |
| TBC1D13  | P2RX1      | VIM     |
| ELAVL2   | KRT37      | BLNK    |
| EDF1     | GOSR2      | CYP26A1 |
| SETX     | PNPO       | ATE1    |
| VIM      | TVP23C     | CDH23   |
| BLNK     | RPS6KB1    | CCSER2  |

|            |          |            |
|------------|----------|------------|
| CYP26A1    | CBX1     | ACTA2      |
| ATE1       | PIGL     | SFXN3      |
| CDH23      | GALK1    | FBXL15     |
| CCSER2     | HOXB6    | PITRM1     |
| ACTA2      | PFN1     | STN1       |
| SFXN3      | SLC25A11 | DNAJC12    |
| FBXL15     | RASD1    | PPIF       |
| PITRM1     | NUP88    | TBC1D12    |
| STN1       | C1QBP    | MPO        |
| DNAJC12    | CPD      | ST6GALNAC2 |
| PPIF       | GOSR1    | DHX33      |
| TBC1D12    | CCDC47   | UTP18      |
| MPO        | MED31    | SLC25A39   |
| ST6GALNAC2 | DRG2     | P2RX5      |
| DHX33      | AKAP10   | EPX        |
| UTP18      | ALDH3A1  | CRYBA1     |
| SLC25A39   | SMARCD2  | NUFIP2     |
| P2RX5      | SYNGR2   | GIT1       |
| EPX        | DDX5     | RPL19      |
| CRYBA1     | C17orf75 | RUNDC3A    |
| NUFIP2     | ASIC2    | CSF3       |
| GIT1       | CCL2     | SUPT4H1    |
| RPL19      | CCL1     | WNT3       |
| RUNDC3A    | CCL13    | SHPK       |
| CSF3       | PEX12    | TAX1BP3    |
| SUPT4H1    | KRT32    | P2RX1      |
| WNT3       | KAT2A    | KRT37      |
| SHPK       | NAGLU    | GOSR2      |
| TAX1BP3    | HSD17B1  | PNPO       |
| P2RX1      | ABI3     | TVP23C     |
| KRT37      | COL1A1   | RPS6KB1    |
| GOSR2      | MRPL27   | CBX1       |
| PNPO       | LRRC59   | PIGL       |
| TVP23C     | HDAC5    | GALK1      |
| RPS6KB1    | PPY      | HOXB6      |
| CBX1       | DUSP3    | PFN1       |
| PIGL       | CACNG1   | SLC25A11   |
| GALK1      | HLF      | RASD1      |
| HOXB6      | EFNB3    | NUP88      |
| PFN1       | RANGRF   | C1QBP      |
| SLC25A11   | RCVRN    | CPD        |
| RASD1      | MYH1     | GOSR1      |
| NUP88      | VTN      | CCDC47     |
| C1QBP      | TNFAIP1  | MED31      |

|          |         |          |
|----------|---------|----------|
| CPD      | TMEM97  | DRG2     |
| GOSR1    | FOXN1   | AKAP10   |
| CCDC47   | ALDOC   | ALDH3A1  |
| MED31    | CD38    | SMARCD2  |
| DRG2     | IBSP    | SYNGR2   |
| AKAP10   | LAP3    | DDX5     |
| ALDH3A1  | CXCL6   | C17orf75 |
| SMARCD2  | JADE1   | ASIC2    |
| SYNGR2   | RUFY3   | CCL2     |
| DDX5     | AFM     | CCL1     |
| C17orf75 | PHOX2B  | CCL13    |
| ASIC2    | GNRHR   | PEX12    |
| CCL2     | CWH43   | KRT32    |
| CCL1     | SULT1E1 | KAT2A    |
| CCL13    | SMR3A   | NAGLU    |
| PEX12    | LAMTOR3 | HSD17B1  |
| KRT32    | PF4V1   | ABI3     |
| KAT2A    | NFKB1   | COL1A1   |
| NAGLU    | KLHL2   | MRPL27   |
| HSD17B1  | IL2     | LRRC59   |
| ABI3     | WFS1    | HDAC5    |
| COL1A1   | GAR1    | PPY      |
| MRPL27   | CLNK    | DUSP3    |
| LRRC59   | FAM149A | CACNG1   |
| HDAC5    | SPA17   | HLF      |
| PPY      | CD82    | EFNB3    |
| DUSP3    | LDHA    | RANGRF   |
| CACNG1   | SPI1    | RCVRN    |
| HLF      | PLEKHB1 | MYH1     |
| EFNB3    | CRYAB   | VTN      |
| RANGRF   | CTSC    | TNFAIP1  |
| RCVRN    | ZPR1    | TMEM97   |
| MYH1     | CRTAM   | FOXN1    |
| VTN      | JHY     | ALDOC    |
| TNFAIP1  | HSPA8   | CD38     |
| TMEM97   | DTX4    | IBSP     |
| FOXN1    | UNC93B1 | LAP3     |
| ALDOC    | PUS3    | CXCL6    |
| CD38     | ST3GAL4 | JADE1    |
| IBSP     | SF1     | RUFY3    |
| LAP3     | CCND1   | AFM      |
| CXCL6    | CCDC86  | PHOX2B   |
| JADE1    | PRPF19  | GNRHR    |
| RUFY3    | TMEM109 | CWH43    |

|         |          |          |
|---------|----------|----------|
| AFM     | ANAPC15  | SULT1E1  |
| PHOX2B  | PANX1    | SMR3A    |
| GNRHR   | APOA5    | LAMTOR3  |
| CWH43   | APOC3    | PF4V1    |
| SULT1E1 | IL10RA   | NFKB1    |
| SMR3A   | GALNT18  | KLHL2    |
| LAMTOR3 | BIRC2    | IL2      |
| PF4V1   | PDHX     | WFS1     |
| NFKB1   | SLC15A3  | GAR1     |
| KLHL2   | SCGB2A2  | FRG1     |
| IL2     | DGAT2    | CLNK     |
| WFS1    | C11orf58 | FAM149A  |
| GAR1    | YBX3     | SPA17    |
| FRG1    | DDX11    | CD82     |
| CLNK    | SART3    | LDHA     |
| FAM149A | ZNF268   | SPI1     |
| SPA17   | RPLP0    | PLEKHB1  |
| CD82    | PXN      | CRYAB    |
| LDHA    | POLR3B   | CTSC     |
| SPI1    | PPFIBP1  | ZPR1     |
| PLEKHB1 | CD69     | CRTAM    |
| CRYAB   | PRDM4    | JHY      |
| CTSC    | CLEC2B   | HSPA8    |
| ZPR1    | SELPLG   | DTX4     |
| CRTAM   | ASIC1    | UNC93B1  |
| JHY     | DAO      | PUS3     |
| HSPA8   | KCTD10   | ST3GAL4  |
| DTX4    | MLEC     | SF1      |
| UNC93B1 | MVK      | CCND1    |
| PUS3    | CSRNP2   | CCDC86   |
| ST3GAL4 | IL23A    | PRPF19   |
| SF1     | SYT10    | TMEM109  |
| CCND1   | CYP27B1  | ANAPC15  |
| CCDC86  | MYF6     | PANX1    |
| PRPF19  | MYF5     | APOA5    |
| TMEM109 | GLI1     | APOC3    |
| ANAPC15 | PPM1H    | IL10RA   |
| PANX1   | LTA4H    | GALNT18  |
| APOA5   | ELK3     | BIRC2    |
| APOC3   | ITFG2    | PDHX     |
| IL10RA  | PRR4     | SLC15A3  |
| GALNT18 | PARP11   | SCGB2A2  |
| BIRC2   | ARPC3    | DGAT2    |
| PDHX    | GPN3     | C11orf58 |

|          |          |          |
|----------|----------|----------|
| SLC15A3  | FGF6     | YBX3     |
| SCGB2A2  | MYL2     | DDX11    |
| DGAT2    | RAD51AP1 | SART3    |
| C11orf58 | AKAP3    | ZNF268   |
| YBX3     | DUSP16   | RPLP0    |
| DDX11    | CREBL2   | PXN      |
| SART3    | CDKN1B   | POLR3B   |
| ZNF268   | SCNN1A   | PPFIBP1  |
| RPLP0    | LTBR     | CD69     |
| PXN      | OGFOD2   | PRDM4    |
| POLR3B   | OAS3     | CLEC2B   |
| PPFIBP1  | ART4     | SELPLG   |
| CD69     | MGP      | ASIC1    |
| PRDM4    | ARHGDIB  | DAO      |
| CLEC2B   | GTF2H3   | KCTD10   |
| SELPLG   | RERGL    | MLEC     |
| ASIC1    | ENDOU    | MVK      |
| DAO      | VDR      | CSRNP2   |
| KCTD10   | FZD10    | IL23A    |
| MLEC     | IL26     | SYT10    |
| MVK      | IFNG     | CYP27B1  |
| CSRNP2   | NUP107   | MYF6     |
| IL23A    | CNOT2    | MYF5     |
| SYT10    | TIMELESS | GLI1     |
| CYP27B1  | KRR1     | PPM1H    |
| MYF6     | MRPL51   | LTA4H    |
| MYF5     | GAPDH    | ELK3     |
| GLI1     | ACRBP    | ITFG2    |
| PPM1H    | COPS7A   | PRR4     |
| LTA4H    | GNB3     | PARP11   |
| ELK3     | CDCA3    | ARPC3    |
| ITFG2    | CHPT1    | GPN3     |
| PRR4     | USP5     | FGF6     |
| PARP11   | TPI1     | MYL2     |
| ARPC3    | ENO2     | RAD51AP1 |
| GPN3     | C12orf57 | AKAP3    |
| FGF6     | APOBEC1  | DUSP16   |
| MYL2     | NANOG    | CREBL2   |
| RAD51AP1 | GOLT1B   | CDKN1B   |
| AKAP3    | PRKAB1   | SCNN1A   |
| DUSP16   | CMAS     | LTBR     |
| CREBL2   | HCFC2    | OGFOD2   |
| CDKN1B   | CLEC4A   | OAS3     |
| SCNN1A   | AICDA    | ART4     |

|          |          |          |
|----------|----------|----------|
| LTBR     | RAB35    | MGP      |
| OGFOD2   | COX6A1   | ARHGDIB  |
| OAS3     | RFX4     | GTF2H3   |
| ART4     | SRSF9    | RERGL    |
| MGP      | FGFR1OP2 | ENDOU    |
| ARHGDIB  | KLRB1    | VDR      |
| GTF2H3   | ZNF76    | FZD10    |
| RERGL    | IYD      | IL26     |
| ENDOU    | FYN      | IFNG     |
| VDR      | RSPH4A   | NUP107   |
| FZD10    | TMEM14C  | CNOT2    |
| IL26     | SMIM8    | TIMELESS |
| IFNG     | ADTRP    | KRR1     |
| NUP107   | ASF1A    | MRPL51   |
| CNOT2    | HINT3    | GAPDH    |
| TIMELESS | NCOA7    | ACRBP    |
| KRR1     | ULBP1    | COPS7A   |
| MRPL51   | SLC44A4  | GNB3     |
| GAPDH    | FBXO5    | CDCA3    |
| ACRBP    | OPRM1    | CHPT1    |
| COPS7A   | FANCE    | USP5     |
| GNB3     | TULP1    | TPI1     |
| CDCA3    | MAPK14   | ENO2     |
| CHPT1    | STK38    | C12orf57 |
| USP5     | HLA-DOA  | APOBEC1  |
| TPI1     | MCM3     | NANOG    |
| ENO2     | RNF8     | GOLT1B   |
| C12orf57 | SAYSD1   | PRKAB1   |
| APOBEC1  | KIF6     | CMAS     |
| NANOG    | CAP2     | HCFC2    |
| GOLT1B   | GPR63    | CLEC4A   |
| PRKAB1   | FBXL4    | AICDA    |
| CMAS     | GPLD1    | RAB35    |
| HCFC2    | ACOT13   | COX6A1   |
| CLEC4A   | B3GAT2   | RFX4     |
| AICDA    | GMNN     | SRSF9    |
| RAB35    | SNX3     | FGFR1OP2 |
| COX6A1   | ZBTB24   | KLRB1    |
| RFX4     | FIG4     | ZNF76    |
| SRSF9    | ADGRG6   | IYD      |
| FGFR1OP2 | UNC93A   | FYN      |
| KLRB1    | C6orf118 | RSPH4A   |
| ZNF76    | MDFI     | TMEM14C  |
| IYD      | TFEB     | SMIM8    |



|          |         |          |
|----------|---------|----------|
| FYN      | BYSL    | ADTRP    |
| RSPH4A   | TBP     | ASF1A    |
| TMEM14C  | GUCA1B  | HINT3    |
| SMIM8    | PRPH2   | NCOA7    |
| ADTRP    | PPP2R5D | ULBP1    |
| ASF1A    | PTK7    | SLC44A4  |
| HINT3    | DNPH1   | FBXO5    |
| NCOA7    | EXOC2   | OPRM1    |
| ULBP1    | TMEM30A | FANCE    |
| SLC44A4  | VEGFA   | TULP1    |
| FBXO5    | TTK     | MAPK14   |
| OPRM1    | LAMA4   | STK38    |
| FANCE    | ENPP5   | HLA-DOA  |
| TULP1    | LY86    | MCM3     |
| MAPK14   | PRSS16  | RNF8     |
| STK38    | MEP1A   | SAYSD1   |
| HLA-DOA  | MTREX   | KIF6     |
| MCM3     | ISL1    | CAP2     |
| RNF8     | SLC6A7  | GPR63    |
| SAYSD1   | HARS2   | FBXL4    |
| KIF6     | NUDT12  | GPLD1    |
| CAP2     | TENT4A  | ACOT13   |
| GPR63    | GHR     | B3GAT2   |
| FBXL4    | DAP     | GMNN     |
| GPLD1    | BRD8    | SNX3     |
| ACOT13   | HBEGF   | ZBTB24   |
| B3GAT2   | LOX     | FIG4     |
| GMNN     | GZMK    | ADGRG6   |
| SNX3     | CDH9    | UNC93A   |
| ZBTB24   | SPARC   | C6orf118 |
| FIG4     | HAND1   | MDFI     |
| ADGRG6   | PCDHB3  | TFEB     |
| UNC93A   | PCDHB5  | BYSL     |
| C6orf118 | PCDHB6  | TBP      |
| MDFI     | PCDHB7  | GUCA1B   |
| TFEB     | PCDHB15 | PRPH2    |
| BYSL     | GRM6    | PPP2R5D  |
| TBP      | THG1L   | MRPL2    |
| GUCA1B   | IL12B   | PTK7     |
| PRPH2    | BTNL8   | DNPH1    |
| PPP2R5D  | TTC1    | EXOC2    |
| MRPL2    | C1QTNF3 | TMEM30A  |
| PTK7     | IRX4    | VEGFA    |
| DNPH1    | LNPEP   | TTK      |

|         |          |         |
|---------|----------|---------|
| EXOC2   | AGXT2    | CCN6    |
| TMEM30A | PRLR     | LAMA4   |
| VEGFA   | IL4      | ENPP5   |
| TTK     | IL5      | LY86    |
| CCN6    | ST8SIA4  | PRSS16  |
| LAMA4   | PCDH12   | MEP1A   |
| ENPP5   | NUP155   | MTREX   |
| LY86    | NR3C1    | ISL1    |
| PRSS16  | C5orf15  | SLC6A7  |
| MEP1A   | TRIM23   | HARS2   |
| MTREX   | TRAPPC13 | NUDT12  |
| ISL1    | RARS1    | TENT4A  |
| SLC6A7  | CDX1     | GHR     |
| HARS2   | BNIP1    | DAP     |
| NUDT12  | SLC7A14  | BRD8    |
| TENT4A  | SEMA3G   | HBEGF   |
| GHR     | ZMYND10  | LOX     |
| DAP     | LTF      | GZMK    |
| BRD8    | MLH1     | CDH9    |
| HBEGF   | EHHADH   | SPARC   |
| LOX     | CRBN     | HAND1   |
| GZMK    | HRG      | PCDHB3  |
| CDH9    | BCL6     | PCDHB5  |
| SPARC   | FAM162A  | PCDHB6  |
| HAND1   | RBP2     | PCDHB7  |
| PCDHB3  | RBP1     | PCDHB15 |
| PCDHB5  | PFKFB4   | GRM6    |
| PCDHB6  | HES1     | THG1L   |
| PCDHB7  | ECT2     | IL12B   |
| PCDHB15 | GNAT1    | BTNL8   |
| GRM6    | TUSC2    | TTC1    |
| THG1L   | NPRL2    | C1QTNF3 |
| IL12B   | CYB561D2 | IRX4    |
| BTNL8   | C3orf14  | LNPEP   |
| TTC1    | GNB4     | AGXT2   |
| C1QTNF3 | MORC1    | PRLR    |
| IRX4    | UMPS     | IL4     |
| LNPEP   | ABTB1    | IL5     |
| AGXT2   | KLHL18   | ST8SIA4 |
| PRLR    | HEMK1    | PCDH12  |
| IL4     | AADAC    | NUP155  |
| IL5     | EIF1B    | NR3C1   |
| ST8SIA4 | ZBTB47   | C5orf15 |
| PCDH12  | TNNC1    | TRIM23  |

|          |         |          |
|----------|---------|----------|
| NUP155   | NKTR    | TRAPPC13 |
| NR3C1    | SPCS1   | RARS1    |
| C5orf15  | NEK4    | CDX1     |
| TRIM23   | TMEM159 | BNIP1    |
| TRAPPC13 | WDFY1   | SLC7A14  |
| RARS1    | EIF2AK2 | SEMA3G   |
| CDX1     | CPS1    | ZMYND10  |
| BNIP1    | DAZAP1  | LTF      |
| SLC7A14  | DDX1    | MLH1     |
| SEMA3G   | FKBP7   | EHHADH   |
| ZMYND10  | HEATR5B | CRBN     |
| LTF      | MDH1    | HRG      |
| MLH1     | MAPRE3  | BCL6     |
| EHHADH   | TMSB10  | FAM162A  |
| CRBN     | MSH2    | RBP2     |
| HRG      | NCK2    | RBP1     |
| BCL6     | TFPI    | PFKFB4   |
| FAM162A  | NDUFS1  | HES1     |
| RBP2     | SLC11A1 | ECT2     |
| RBP1     | APOB    | GNAT1    |
| PFKFB4   | RTKN    | TUSC2    |
| HES1     | INO80B  | NPRL2    |
| ECT2     | TTL     | CYB561D2 |
| GNAT1    | FAHD2A  | C3orf14  |
| TUSC2    | SF3B6   | GNB4     |
| NPRL2    | CENPA   | MORC1    |
| CYB561D2 | SLC30A3 | UMPS     |
| C3orf14  | MPV17   | ABTB1    |
| GNB4     | NRBP1   | KLHL18   |
| MORC1    | SNX17   | HEMK1    |
| UMPS     | REEP6   | RRP9     |
| ABTB1    | APC2    | AADAC    |
| KLHL18   | RPS15   | EIF1B    |
| HEMK1    | GCA     | ZBTB47   |
| RRP9     | WBP1    | TNNC1    |
| AADAC    | TTC31   | NKTR     |
| EIF1B    | NDUFS7  | SPCS1    |
| ZBTB47   | PCGF1   | NEK4     |
| TNNC1    | TLX2    | TMEM159  |
| NKTR     | DOK1    | WDFY1    |
| SPCS1    | ACADL   | EIF2AK2  |
| NEK4     | EVA1A   | CPS1     |
| TMEM159  | LANCL1  | DAZAP1   |
| WDFY1    | REG1A   | DDX1     |

|         |          |         |
|---------|----------|---------|
| EIF2AK2 | FANCL    | FKBP7   |
| CPS1    | IGFBP2   | HEATR5B |
| DAZAP1  | IGFBP5   | MDH1    |
| DDX1    | KCNJ13   | MAPRE3  |
| FKBP7   | GGCX     | TMSB10  |
| HEATR5B | MOB4     | MSH2    |
| MDH1    | HSPE1    | NCK2    |
| MAPRE3  | PRKAG3   | TFPI    |
| TMSB10  | WNT6     | NDUFS1  |
| MSH2    | IL1RL1   | SLC11A1 |
| NCK2    | IL18R1   | APOB    |
| TFPI    | SLC9A2   | RTKN    |
| NDUFS1  | AZU1     | INO80B  |
| SLC11A1 | PPP1R7   | TTL     |
| APOB    | PASK     | FAHD2A  |
| RTKN    | PROC     | SF3B6   |
| INO80B  | ID2      | CENPA   |
| TTL     | ODC1     | SLC30A3 |
| FAHD2A  | PLEKHB2  | MPV17   |
| SF3B6   | GREB1    | NRBP1   |
| CENPA   | GORASP2  | SNX17   |
| SLC30A3 | CEBPZ    | REEP6   |
| MPV17   | PRKD3    | APC2    |
| NRBP1   | RMDN2    | RPS15   |
| SNX17   | DLX2     | GCA     |
| REEP6   | SLC1A4   | WBP1    |
| APC2    | ORC2     | TTC31   |
| GCA     | COX7A2L  | NDUFS7  |
| WBP1    | PPP3R1   | PCGF1   |
| TTC31   | PLEK     | TLX2    |
| NDUFS7  | PRTN3    | DOK1    |
| PCGF1   | KISS1R   | ACADL   |
| TLX2    | GRIN3B   | EVA1A   |
| DOK1    | VAX2     | LANCL1  |
| ACADL   | ATP6V1B1 | REG1A   |
| EVA1A   | MSH6     | FANCL   |
| LANCL1  | PLEKHA3  | IGFBP2  |
| REG1A   | SPR      | IGFBP5  |
| FANCL   | ENO1     | KCNJ13  |
| IGFBP2  | CDC7     | GGCX    |
| IGFBP5  | SARS1    | MOB4    |
| KCNJ13  | CLCA1    | HSPE1   |
| GGCX    | BCL9     | PRKAG3  |
| MOB4    | TPSG1    | WNT6    |

|          |          |          |
|----------|----------|----------|
| HSPE1    | ANGPTL1  | IL1RL1   |
| PRKAG3   | TCEANC2  | IL18R1   |
| WNT6     | TMEM59   | SLC9A2   |
| IL1RL1   | RPL22    | AZU1     |
| IL18R1   | OPRD1    | PPP1R7   |
| SLC9A2   | WDR77    | PASK     |
| AZU1     | RNF19B   | PROC     |
| PPP1R7   | DLGAP3   | ID2      |
| PASK     | C1orf21  | ODC1     |
| PROC     | MAD2L2   | PLEKHB2  |
| ID2      | MFN2     | GREB1    |
| ODC1     | MIIP     | GORASP2  |
| PLEKHB2  | SLC35D1  | PRKD3    |
| GREB1    | PRAMEF4  | RMDN2    |
| GORASP2  | PRDM2    | DLX2     |
| CEBPZ    | RGS2     | SLC1A4   |
| PRKD3    | DENND1B  | ORC2     |
| RMDN2    | WARS2    | COX7A2L  |
| DLX2     | OSCP1    | PPP3R1   |
| SLC1A4   | AKR7A2   | PLEK     |
| ORC2     | GBP3     | PRTN3    |
| COX7A2L  | RAB29    | KISS1R   |
| PPP3R1   | CD160    | GRIN3B   |
| PLEK     | HMGCL    | VAX2     |
| PRTN3    | P3H1     | ATP6V1B1 |
| KISS1R   | EBNA1BP2 | MSH6     |
| GRIN3B   | ATP6V0B  | PLEKHA3  |
| VAX2     | SLC19A2  | SPR      |
| ATP6V1B1 | SELL     | ENO1     |
| MSH6     | VAMP4    | CDC7     |
| PLEKHA3  | SYF2     | SARS1    |
| SPR      | DHDDS    | CLCA1    |
| ENO1     | PPP1R8   | BCL9     |
| CDC7     | SLC5A9   | TPSG1    |
| SARS1    | CTSD     | ANGPTL1  |
| CLCA1    | COLEC11  | TCEANC2  |
| BCL9     | STAG1    | TMEM59   |
| TPSG1    | A4GNT    | RPL22    |
| ANGPTL1  | MMP8     | OPRD1    |
| TCEANC2  | APOA1    | WDR77    |
| TMEM59   | SLC8A2   | RNF19B   |
| RPL22    | NR5A2    | DLGAP3   |
| OPRD1    | TNNT2    | C1orf21  |
| WDR77    | CAMSAP2  | MAD2L2   |

|          |          |          |
|----------|----------|----------|
| RNF19B   | FCGR2B   | MFN2     |
| DLGAP3   | FCRLA    | MIIP     |
| C1orf21  | EEF1B2   | SLC35D1  |
| MAD2L2   | ATIC     | PRAMEF4  |
| MFN2     | TNP1     | PRDM2    |
| MIIP     | FASTKD2  | RGS2     |
| SLC35D1  | TTR      | DENND1B  |
| PRAMEF4  | B4GALT6  | WARS2    |
| PRDM2    | DOP1A    | OSCP1    |
| RGS2     | FILIP1   | SLAMF1   |
| DENND1B  | UBE3D    | AKR7A2   |
| WARS2    | SPACA1   | GBP3     |
| OSCP1    | SGIP1    | RAB29    |
| SLAMF1   | TBPL1    | CD160    |
| AKR7A2   | FBXO30   | HMGCL    |
| GBP3     | ADAT2    | P3H1     |
| RAB29    | TNFAIP3  | EBNA1BP2 |
| CD160    | SGK1     | ATP6V0B  |
| HMGCL    | TCF21    | SLC19A2  |
| P3H1     | PMFBP1   | SELL     |
| EBNA1BP2 | MED28    | VAMP4    |
| ATP6V0B  | RNF103   | SYF2     |
| SLC19A2  | MYL12B   | DHDDS    |
| SELL     | GHRH     | PPP1R8   |
| VAMP4    | RPN2     | SLC5A9   |
| SYF2     | SOGA1    | CTSD     |
| DHDDS    | PKD2     | COLEC11  |
| PPP1R8   | ABCG2    | STAG1    |
| SLC5A9   | SPP1     | A4GNT    |
| CTSD     | STBD1    | MMP8     |
| COLEC11  | ADH6     | APOA1    |
| STAG1    | CCNI     | SLC8A2   |
| A4GNT    | RARRES1  | NR5A2    |
| MMP8     | LDAH     | TNNT2    |
| APOA1    | FGF23    | CAMSAP2  |
| SLC8A2   | ELL2     | FCGR2B   |
| NR5A2    | GLRX     | FCRLA    |
| TNNT2    | NDUFB3   | EEF1B2   |
| CAMSAP2  | ZFAND5   | ATIC     |
| FCGR2B   | GDA      | TNP1     |
| FCRLA    | ECRG4    | FASTKD2  |
| ATIC     | YWHAQ    | TTR      |
| TNP1     | ITGB1BP1 | B4GALT6  |
| FASTKD2  | CPSF3    | DOP1A    |

|          |           |           |
|----------|-----------|-----------|
| TTR      | DDX55     | FILIP1    |
| B4GALT6  | CCDC92    | UBE3D     |
| DOP1A    | FKBP15    | SPACA1    |
| FILIP1   | CNTRL     | SGIP1     |
| UBE3D    | HDHD3     | TBPL1     |
| SPACA1   | ALG2      | ZC2HC1B   |
| SGIP1    | VPS4B     | FBXO30    |
| TBPL1    | SERPINB10 | ADAT2     |
| ZC2HC1B  | GSC       | TNFAIP3   |
| FBXO30   | ADCK1     | SGK1      |
| ADAT2    | PGF       | TCF21     |
| TNFAIP3  | NEK9      | PMFBP1    |
| SGK1     | ACYPI     | MED28     |
| TCF21    | IFT43     | RNF103    |
| PMFBP1   | NPC2      | MYL12B    |
| MED28    | IRF2BPL   | GHRH      |
| RNF103   | ACOT2     | RPN2      |
| MYL12B   | FLVCR2    | SOGA1     |
| GHRH     | DLST      | PKD2      |
| RPN2     | TGFB3     | ABCG2     |
| SOGA1    | ZC2HC1C   | SPP1      |
| PKD2     | PAPOLG    | STBD1     |
| ABCG2    | TP53I3    | ADH6      |
| SPP1     | RHOQ      | CCNI      |
| STBD1    | TMEM214   | RARRES1   |
| ADH6     | ATAD2B    | LDAH      |
| CCNI     | FAM98A    | FGF23     |
| RARRES1  | YIPF4     | ELL2      |
| LDAH     | AFTPH     | GLRX      |
| FGF23    | LGALSL    | NDUFB3    |
| ELL2     | CRIPT     | ZFAND5    |
| GLRX     | ADGRB3    | GDA       |
| NDUFB3   | MFSD13A   | ECRG4     |
| ZFAND5   | SLF2      | YWHAQ     |
| GDA      | PPP1R3C   | ITGB1BP1  |
| ECRG4    | MXI1      | CPSF3     |
| YWHAQ    | HELLS     | DDX55     |
| ITGB1BP1 | PRLHR     | CCDC92    |
| CPSF3    | HOXB8     | FKBP15    |
| DDX55    | HOXB5     | CNTRL     |
| CCDC92   | HOXB7     | HDHD3     |
| FKBP15   | HOXB1     | ALG2      |
| CNTRL    | DUSP1     | VPS4B     |
| HDHD3    | PANK3     | SERPINB10 |

|           |          |         |
|-----------|----------|---------|
| ALG2      | MSX2     | GSC     |
| VPS4B     | INSL4    | ADCK1   |
| SERPINB10 | IFNA7    | PGF     |
| GSC       | LRP11    | NEK9    |
| ADCK1     | CCDC170  | ACYP1   |
| PGF       | ARAP3    | IFT43   |
| NEK9      | PCDHB8   | NPC2    |
| ACYP1     | PCDHB10  | IRF2BPL |
| IFT43     | PCDHB14  | ACOT2   |
| NPC2      | PCDHB12  | FLVCR2  |
| IRF2BPL   | SLC25A2  | DLST    |
| ACOT2     | PRRX1    | TGFB3   |
| FLVCR2    | TNN      | ZC2HC1C |
| DLST      | TLL2     | SLIRP   |
| TGFB3     | MSANTD2  | PAPOLG  |
| ZC2HC1C   | PDZD11   | TP53I3  |
| PAPOLG    | NUDCD1   | RHOQ    |
| TP53I3    | CCDC77   | TMEM214 |
| RHOQ      | MTRF1    | ATAD2B  |
| TMEM214   | CCDC169  | FAM98A  |
| ATAD2B    | UFM1     | YIPF4   |
| FAM98A    | ELF1     | AFTPH   |
| YIPF4     | EXOSC8   | LGALSL  |
| AFTPH     | FAM53C   | CRIP1   |
| LGALSL    | MYOT     | ADGRB3  |
| CRIP1     | EGR1     | MFSD13A |
| ADGRB3    | PFN2     | SLF2    |
| MFSD13A   | SERP1    | PPP1R3C |
| SLF2      | MTERF2   | MXI1    |
| LIPF      | NFYB     | HELLS   |
| PPP1R3C   | WASHC3   | PRLHR   |
| MXI1      | FZD3     | HOXB8   |
| HELLS     | SLC39A14 | HOXB5   |
| PRLHR     | DUSP4    | HOXB7   |
| HOXB8     | SORBS3   | HOXB1   |
| HOXB5     | PPP3CC   | DUSP1   |
| HOXB7     | RNF170   | PANK3   |
| HOXB1     | TARDBP   | MSX2    |
| DUSP1     | PRAMEF2  | INSL4   |
| PANK3     | RDH10    | IFNA7   |
| MSX2      | LUC7L3   | LRP11   |
| INSL4     | DLX4     | CCDC170 |
| IFNA7     | COIL     | ARAP3   |
| LRP11     | TBX2     | PCDHB8  |



|          |          |          |
|----------|----------|----------|
| CCDC170  | SLC35B1  | PCDHB10  |
| ARAP3    | TBX4     | PCDHB14  |
| PCDHB8   | TEX14    | PCDHB12  |
| PCDHB10  | FAM117A  | SLC25A2  |
| PCDHB14  | NCAPH    | PRRX1    |
| PCDHB12  | TMEM131L | TNN      |
| SLC25A2  | MND1     | TTLL2    |
| PRRX1    | ZNF141   | MSANTD2  |
| TNN      | TSHZ3    | PDZD11   |
| TTLL2    | PLBD1    | NUDCD1   |
| MSANTD2  | KLRK1    | CCDC77   |
| PDZD11   | PRB1     | MTRF1    |
| NUDCD1   | PYROXD1  | CCDC169  |
| CCDC77   | IAPP     | UFM1     |
| MTRF1    | KCNJ8    | ELF1     |
| CCDC169  | ZNF549   | ALG5     |
| UFM1     | ZSCAN18  | EXOSC8   |
| ELF1     | ZNF211   | FAM53C   |
| ALG5     | TFG      | MYOT     |
| EXOSC8   | KALRN    | EGR1     |
| FAM53C   | NAA50    | PFN2     |
| MYOT     | MAPK8IP1 | SERP1    |
| EGR1     | PEX16    | MTERF2   |
| PFN2     | DEPDC7   | NFYB     |
| SERP1    | CAT      | WASHC3   |
| MTERF2   | ACHE     | FZD3     |
| NFYB     | FBXO24   | DUSP4    |
| WASHC3   | GJB6     | SORBS3   |
| FZD3     | GJA3     | PPP3CC   |
| SLC39A14 | GHSR     | RNF170   |
| DUSP4    | TNFSF10  | TARDBP   |
| SORBS3   | SLITRK3  | PRAMEF2  |
| PPP3CC   | CPXM2    | RDH10    |
| RNF170   | CSMD2    | LUC7L3   |
| TARDBP   | GSTM2    | DLX4     |
| PRAMEF2  | ADORA3   | COIL     |
| RDH10    | GTDC1    | TBX2     |
| LUC7L3   | CXCR4    | SLC35B1  |
| DLX4     | ACVR2A   | TBX4     |
| COIL     | POLK     | TEX14    |
| TBX2     | FLT3     | FAM117A  |
| SLC35B1  | RASL11A  | NCAPH    |
| TBX4     | FYTTD1   | TMEM131L |
| TEX14    | MTERF4   | MND1     |

|          |          |          |
|----------|----------|----------|
| FAM117A  | MRPS2    | ZNF141   |
| NCAPH    | MYOG     | TSHZ3    |
| TMEM131L | COPA     | KLRK1    |
| MND1     | PRM2     | PRB1     |
| ZNF141   | OPN4     | PYROXD1  |
| TSHZ3    | AHR      | IAPP     |
| PLBD1    | SCRN1    | KCNJ8    |
| KLRK1    | ETV1     | TAS2R7   |
| PRB1     | BBS9     | TAS2R9   |
| PYROXD1  | OCM      | ZNF549   |
| IAPP     | EEPDI    | ZSCAN18  |
| KCNJ8    | WIPF3    | ZNF211   |
| TAS2R7   | NPY      | TFG      |
| TAS2R9   | HOXA7    | KALRN    |
| ZNF549   | INHBA    | NAA50    |
| ZSCAN18  | FKBP9    | MAPK8IP1 |
| ZNF211   | POLM     | PEX16    |
| TFG      | RAMP3    | DEPDC7   |
| KALRN    | MRM2     | CAT      |
| NAA50    | TWIST1   | ACHE     |
| MAPK8IP1 | SLC25A51 | FBXO24   |
| PEX16    | CLTA     | GJB6     |
| DEPDC7   | TAF1L    | GJA3     |
| CAT      | PHF24    | GHSR     |
| ACHE     | DNAI1    | TNFSF10  |
| FBXO24   | DCAF10   | SLITRK3  |
| GJB6     | ZC3HAV1  | CPXM2    |
| GJA3     | AKR1D1   | CSMD2    |
| GHSR     | NEUROG3  | GSTM2    |
| TNFSF10  | SRGN     | ADORA3   |
| SLITRK3  | EGR2     | GTDC1    |
| CPXM2    | FAM149B1 | CXCR4    |
| CSMD2    | UNG      | ACVR2A   |
| GSTM2    | DYNLL1   | POLK     |
| ADORA3   | IFT81    | FLT3     |
| GTDC1    | ACADS    | RASL11A  |
| CXCR4    | HVCN1    | FYTTD1   |
| ACVR2A   | RNF11    | MTERF4   |
| POLK     | BHLHE41  | MRPS2    |
| FLT3     | SSPN     | MYOG     |
| RASL11A  | STX10    | COPA     |
| FYTTD1   | DDX39A   | PRM2     |
| MTERF4   | PKN1     | OPN4     |
| MRPS2    | TRIR     | AHR      |

|          |          |          |
|----------|----------|----------|
| MYOG     | ADGRE5   | SCRN1    |
| COPA     | ZNF442   | ETV1     |
| PRM2     | KLHL24   | BBS9     |
| OPN4     | CCDC70   | OCM      |
| AHR      | EBPL     | EEPD1    |
| SCRN1    | ATP7B    | WIPF3    |
| ETV1     | ZC3H13   | NPY      |
| BBS9     | CENPK    | HOXA7    |
| OCM      | NEUROD4  | INHBA    |
| EEPD1    | PFDN5    | FKBP9    |
| WIPF3    | ORMDL2   | POLM     |
| NPY      | NR4A1    | RAMP3    |
| HOXA7    | PDE1B    | MRM2     |
| INHBA    | HOXC13   | TWIST1   |
| FKBP9    | LRP1     | SLC25A51 |
| POLM     | HOXC11   | CLTA     |
| RAMP3    | HOXC12   | TAF1L    |
| MRM2     | HOXC6    | PHF24    |
| TWIST1   | FAAH     | DNAI1    |
| SLC25A51 | RSRP1    | DCAF10   |
| CLTA     | IL13RA2  | ZC3HAV1  |
| TAF1L    | COL10A1  | AKR1D1   |
| PHF24    | SEC61A1  | NEUROG3  |
| DNAI1    | TCEAL3   | SRGN     |
| DCAF10   | RAB9B    | EGR2     |
| ZC3HAV1  | NRK      | FAM149B1 |
| AKR1D1   | MAGEA9   | UNG      |
| NEUROG3  | RIF1     | DYNLL1   |
| SRGN     | TTC21B   | IFT81    |
| EGR2     | NMI      | ACADS    |
| FAM149B1 | TNFAIP6  | HVCN1    |
| UNG      | ACVR1C   | RNF11    |
| DYNLL1   | SLC36A1  | BHLHE41  |
| IFT81    | BATF3    | SSPN     |
| ACADS    | KCNJ2    | ITPR2    |
| HVCN1    | EXOSC9   | STX10    |
| RNF11    | PLA2G12A | DDX39A   |
| BHLHE41  | SNRPA    | PKN1     |
| SSPN     | B9D2     | TRIR     |
| ITPR2    | COQ8B    | ADGRE5   |
| STX10    | ZNF468   | ZNF442   |
| DDX39A   | ZNF415   | KLHL24   |
| PKN1     | ZNF350   | CCDC70   |
| TRIR     | RAB38    | EBPL     |

|          |           |          |
|----------|-----------|----------|
| ADGRE5   | GPR83     | ATP7B    |
| ZNF442   | HAUS3     | ZC3H13   |
| KLHL24   | CHPF      | CENPK    |
| CCDC70   | INHA      | NEUROD4  |
| EBPL     | FAM124B   | PFDN5    |
| ATP7B    | SP140L    | ORMDL2   |
| ZC3H13   | ENKD1     | NR4A1    |
| CENPK    | UBE2C     | PDE1B    |
| NEUROD4  | SLC35C2   | HOXC13   |
| PFDN5    | ACTR5     | LRP1     |
| ORMDL2   | CTCFL     | HOXC11   |
| NR4A1    | SYS1      | HOXC12   |
| PDE1B    | PI3       | HOXC6    |
| HOXC13   | WFDC3     | FAAH     |
| LRP1     | SLC12A5   | RSRP1    |
| HOXC11   | ATP5F1E   | IL13RA2  |
| HOXC12   | PLCG1     | COL10A1  |
| HOXC6    | SRSF6     | SEC61A1  |
| FAAH     | RAB22A    | TCEAL3   |
| RSRP1    | PTGIS     | RAB9B    |
| IL13RA2  | CDH26     | NRK      |
| COL10A1  | SNAI1     | MAGEA9   |
| SEC61A1  | MOCS3     | RIF1     |
| TCEAL3   | RNF114    | TTC21B   |
| RAB9B    | MAGEA10   | NMI      |
| NRK      | PEPD      | TNFAIP6  |
| MAGEA9   | IL9R      | ACVR1C   |
| RIF1     | NAGK      | SLC36A1  |
| TTC21B   | MCEE      | BATF3    |
| NMI      | PAIP2B    | KCNJ2    |
| TNFAIP6  | SNRNP27   | EXOSC9   |
| ACVR1C   | MPHOSPH10 | PLA2G12A |
| SLC36A1  | IL17C     | SNRPA    |
| BATF3    | LIPE      | B9D2     |
| KCNJ2    | PSG9      | COQ8B    |
| EXOSC9   | PSG4      | ZNF468   |
| PLA2G12A | PSG1      | ZNF415   |
| SNRPA    | HIF3A     | ZNF350   |
| B9D2     | IRGC      | RAB38    |
| COQ8B    | LYPD3     | GPR83    |
| ZNF468   | CEACAM8   | HAUS3    |
| ZNF415   | RNF39     | CHPF     |
| ZNF350   | DST       | INHA     |
| RAB38    | FBXO9     | FAM124B  |

|           |         |           |
|-----------|---------|-----------|
| GPR83     | PACSIN1 | SP140L    |
| HAUS3     | RRP36   | ENKD1     |
| CHPF      | BTN1A1  | UBE2C     |
| INHA      | BTN3A3  | SLC35C2   |
| FAM124B   | SNRPC   | ACTR5     |
| SP140L    | SLC17A1 | GCNT7     |
| ENKD1     | ABCC10  | CTCFL     |
| UBE2C     | PEX6    | SYS1      |
| SLC35C2   | UNC5CL  | PI3       |
| ACTR5     | AARS2   | WFDC3     |
| GCNT7     | ZNF391  | SLC12A5   |
| CTCFL     | TCP11   | ATP5F1E   |
| SYS1      | APOBEC2 | PLCG1     |
| PI3       | KLHDC3  | SRSF6     |
| WFDC3     | TREM1   | RAB22A    |
| SLC12A5   | MEA1    | PTGIS     |
| ATP5F1E   | COL21A1 | CDH26     |
| PLCG1     | CDKN1A  | SNAI1     |
| SRSF6     | SOX4    | MOCS3     |
| RAB22A    | CPNE5   | RNF114    |
| PTGIS     | SSR1    | MAGEA10   |
| CDH26     | NRN1    | PEPD      |
| SNAI1     | ATXN1   | IL9R      |
| MOCS3     | DEK     | NAGK      |
| RNF114    | BLOC1S5 | MCEE      |
| MAGEA10   | LRRFIP1 | PAIP2B    |
| PEPD      | EREG    | SNRNP27   |
| IL9R      | TRIM51  | MPHOSPH10 |
| NAGK      | SCGB1D2 | IL17C     |
| MCEE      | SCGB2A1 | LIPE      |
| PAIP2B    | EMC3    | PSG9      |
| SNRNP27   | SH3TC1  | PSG4      |
| MPHOSPH10 | KATNAL2 | PSG1      |
| IL17C     | BBS2    | HIF3A     |
| LIPE      | MT2A    | IRGC      |
| PSG9      | GOT2    | LYPD3     |
| PSG4      | SPHK2   | CEACAM8   |
| PSG1      | PIWIL1  | RNF39     |
| HIF3A     | RAP2A   | DST       |
| IRGC      | SLC10A2 | FBXO9     |
| LYPD3     | HROB    | PACSIN1   |
| CEACAM8   | SLC22A5 | RRP36     |
| RNF39     | IRF1    | BTN1A1    |
| DST       | NIN     | BTN3A3    |

|         |         |         |
|---------|---------|---------|
| FBXO9   | DMAC2L  | SNRPC   |
| PACSIN1 | BMP4    | SLC17A1 |
| RRP36   | PTGER2  | ABCC10  |
| BTN1A1  | RPS29   | H1-3    |
| BTN3A3  | SOX9    | H4C6    |
| SNRPC   | MYH2    | PEX6    |
| SLC17A1 | MRPS7   | UNC5CL  |
| ABCC10  | ARMC7   | AARS2   |
| H1-3    | MIF4GD  | H1-1    |
| H4C6    | NT5C    | ZNF391  |
| PEX6    | MSTO1   | TCP11   |
| UNC5CL  | MBOAT7  | APOBEC2 |
| AARS2   | LILRB3  | KLHDC3  |
| H1-1    | ZBTB46  | TREM1   |
| ZNF391  | SLC35F5 | MEA1    |
| TCP11   | INSIG2  | COL21A1 |
| APOBEC2 | PSD4    | CDKN1A  |
| KLHDC3  | ALKBH7  | SOX4    |
| TREM1   | CLPP    | CPNE5   |
| MEA1    | TNFSF9  | SSR1    |
| COL21A1 | THOC2   | NRN1    |
| CDKN1A  | RPL23   | ATXN1   |
| SOX4    | STRADA  | DEK     |
| CPNE5   | CD70    | BLOC1S5 |
| SSR1    | C3      | LRRFIP1 |
| NRN1    | SH2D3A  | EREG    |
| ATXN1   | TNFSF14 | TRIM51  |
| DEK     | RTN2    | SCGB1D2 |
| BLOC1S5 | EML2    | SCGB2A1 |
| LRRFIP1 | VASP    | EMC3    |
| EREG    | SYMPK   | SH3TC1  |
| TRIM51  | CFAP61  | KATNAL2 |
| SCGB1D2 | CDC25B  | BBS2    |
| SCGB2A1 | CD93    | MT2A    |
| EMC3    | CST8    | GOT2    |
| SH3TC1  | PSMF1   | SPHK2   |
| KATNAL2 | CSTL1   | PIWIL1  |
| BBS2    | TMX4    | RAP2A   |
| MT2A    | AP5S1   | SLC10A2 |
| GOT2    | RRBP1   | HROB    |
| SPHK2   | DSTN    | SLC22A5 |
| PIWIL1  | LAMP5   | IRF1    |
| RAP2A   | SNRPB2  | NIN     |
| SLC10A2 | TCF15   | DMAC2L  |

|         |           |         |
|---------|-----------|---------|
| HROB    | OTOR      | BMP4    |
| SLC22A5 | FAM110A   | PTGER2  |
| IRF1    | SCRT2     | RPS29   |
| NIN     | DEFB129   | SOX9    |
| DMAC2L  | TLE6      | MYH2    |
| BMP4    | S1PR4     | MRPS7   |
| PTGER2  | NCLN      | ARMC7   |
| RPS29   | CITED1    | MIF4GD  |
| SOX9    | PITHD1    | NT5C    |
| MYH2    | MAX       | MSTO1   |
| MRPS7   | FNTB      | MBOAT7  |
| ARMC7   | ARMCX5    | LILRB3  |
| MIF4GD  | MMP24     | ZBTB46  |
| NT5C    | NECAB3    | SLC35F5 |
| MSTO1   | RALY      | INSIG2  |
| MBOAT7  | C20orf173 | PSD4    |
| LILRB3  | PLAGL2    | ALKBH7  |
| ZBTB46  | AGO3      | CLPP    |
| SLC35F5 | KLC1      | TNFSF9  |
| INSIG2  | PCID2     | THOC2   |
| PSD4    | SLURP1    | RPL23   |
| ALKBH7  | LRFN3     | STRADA  |
| CLPP    | IGFLR1    | CD70    |
| TNFSF9  | CAPNS1    | C3      |
| THOC2   | PDCD2L    | SH2D3A  |
| RPL23   | UBA2      | TNFSF14 |
| STRADA  | FFAR2     | RTN2    |
| CD70    | HCST      | EML2    |
| C3      | FFAR1     | VASP    |
| SH2D3A  | KRT13     | SYMPK   |
| TNFSF14 | KRT35     | CFAP61  |
| RTN2    | KRT38     | CDC25B  |
| EML2    | CCR7      | CD93    |
| VASP    | KRT9      | CST8    |
| SYMPK   | NR1D1     | PSMF1   |
| CFAP61  | ARL2      | CSTL1   |
| CDC25B  | BCL2L12   | TMX4    |
| CD93    | RRAS      | AP5S1   |
| CST8    | PRRG2     | RRBP1   |
| PSMF1   | FLRT1     | DSTN    |
| CSTL1   | SBDS      | LAMP5   |
| TMX4    | CSN1S1    | SNRPB2  |
| AP5S1   | STATH     | TCF15   |
| RRBP1   | HTN1      | OTOR    |

|           |         |           |
|-----------|---------|-----------|
| DSTN      | MLX     | BANF2     |
| LAMP5     | WNK4    | FAM110A   |
| SNRPB2    | DNASE1  | SCRT2     |
| TCF15     | TRAP1   | DEFB129   |
| OTOR      | SUGP1   | TLE6      |
| BANF2     | DDX49   | S1PR4     |
| FAM110A   | SDF2    | NCLN      |
| SCRT2     | NSRP1   | CITED1    |
| DEFB129   | AHDC1   | PITHD1    |
| TLE6      | SLC35A2 | MAX       |
| S1PR4     | CFP     | FNTB      |
| NCLN      | ELK1    | ARMCX5    |
| CITED1    | ATG14   | MMP24     |
| PITHD1    | DLGAP5  | NECAB3    |
| MAX       | L3HYPDH | RALY      |
| FNTB      | HSPA2   | C20orf173 |
| ARMCX5    | TBPL2   | PLAGL2    |
| MMP24     | SGPP1   | AGO3      |
| NECAB3    | PLEKHG3 | UROD      |
| RALY      | EVI2A   | KLC1      |
| C20orf173 | OMG     | PCID2     |
| PLAGL2    | AIF1L   | SLURP1    |
| AGO3      | CTAG2   | LRFN3     |
| UROD      | MAGEC2  | IGFLR1    |
| KLC1      | CANX    | CAPNS1    |
| PCID2     | PYCARD  | PDCD2L    |
| SLURP1    | COX7C   | UBA2      |
| LRFN3     | PHPT1   | FFAR2     |
| IGFLR1    | TRAF2   | HCST      |
| CAPNS1    | ABHD8   | FFAR1     |
| PDCD2L    | COL14A1 | KRT13     |
| UBA2      | HELB    | KRT35     |
| FFAR2     | TSPAN8  | KRT38     |
| HCST      | RAB3IP  | CCR7      |
| FFAR1     | YEATS4  | KRT9      |
| KRT13     | TAS2R3  | NR1D1     |
| KRT35     | TAS2R4  | ARL2      |
| KRT38     | TAS2R5  | BCL2L12   |
| CCR7      | ZNF777  | RRAS      |
| KRT9      | IDUA    | PRRG2     |
| NR1D1     | ZNF317  | FLRT1     |
| ARL2      | PIN1    | SBDS      |
| BCL2L12   | FBXL12  | CSN1S1    |
| RRAS      | KIF17   | STATH     |



|         |          |         |
|---------|----------|---------|
| PRRG2   | CYP4F11  | HTN1    |
| FLRT1   | SIN3B    | MLX     |
| SBDS    | EPS15L1  | WNK4    |
| CSN1S1  | KLF2     | DNASE1  |
| STATH   | F2RL3    | TRAP1   |
| HTN1    | HCFC1R1  | SUGP1   |
| MLX     | JPT2     | DDX49   |
| WNK4    | UNKL     | SDF2    |
| DNASE1  | GFER     | NSRP1   |
| TRAP1   | SYNGR3   | AHDC1   |
| SUGP1   | RAB40C   | SLC35A2 |
| DDX49   | GNG13    | CFP     |
| SDF2    | ZNF10    | ELK1    |
| NSRP1   | CLEC4M   | ATG14   |
| AHDC1   | TICAM1   | DLGAP5  |
| SLC35A2 | MON1B    | L3HYPDH |
| CFP     | METTL25  | HSPA2   |
| ELK1    | EMC6     | TBPL2   |
| ATG14   | TUBA4A   | SGPP1   |
| DLGAP5  | VIL1     | PLEKHG3 |
| L3HYPDH | AAMP     | EVI2A   |
| HSPA2   | PNKD     | OMG     |
| TBPL2   | TNFRSF19 | AIF1L   |
| SGPP1   | PHTF2    | CTAG2   |
| PLEKHG3 | HSPB1    | MAGEC2  |
| EVI2A   | GNG11    | CANX    |
| OMG     | SEM1     | PYCARD  |
| AIF1L   | GNGT1    | COX7C   |
| CTAG2   | PTPN12   | PHPT1   |
| MAGEC2  | FGL2     | TRAF2   |
| CANX    | STYXL1   | ABHD8   |
| PYCARD  | PEX1     | COL14A1 |
| COX7C   | LRFN1    | HELB    |
| PHPT1   | SPINK2   | TSPAN8  |
| TRAF2   | RASL11B  | RAB3IP  |
| ABHD8   | DGCR6L   | YEATS4  |
| COL14A1 | NCF4     | NDUFB2  |
| HELB    | CYTH4    | TAS2R3  |
| TSPAN8  | GCAT     | TAS2R4  |
| RAB3IP  | SGSM3    | TAS2R5  |
| YEATS4  | SEZ6L    | ZNF777  |
| NDUFB2  | VPREB3   | IDUA    |
| TAS2R3  | YWHAH    | ZNF317  |
| TAS2R4  | RFPL2    | PIN1    |

|          |          |          |
|----------|----------|----------|
| TAS2R5   | A4GALT   | FBXL12   |
| ZNF777   | RFPL3    | KIF17    |
| IDUA     | CDC42EP1 | CYP4F11  |
| ZNF317   | MCHR1    | SIN3B    |
| PIN1     | TST      | EPS15L1  |
| FBXL12   | APOL5    | KLF2     |
| KIF17    | IPLL1    | F2RL3    |
| CYP4F11  | CCDC117  | HCFC1R1  |
| SIN3B    | APOL2    | JPT2     |
| EPS15L1  | RAC2     | UNKL     |
| KLF2     | LIF      | GFER     |
| F2RL3    | C22orf23 | SYNGR3   |
| HCFC1R1  | APOBEC3A | RAB40C   |
| JPT2     | EMC4     | GNG13    |
| UNKL     | PMPCB    | ZNF10    |
| GFER     | TAS2R16  | CLEC4M   |
| SYNGR3   | ATP6V1F  | TICAM1   |
| RAB40C   | LSM8     | MON1B    |
| GNG13    | VGFB     | METTL25  |
| ZNF10    | STRIP2   | EMC6     |
| CLEC4M   | DNAJB9   | TUBA4A   |
| TICAM1   | LRRC4    | VIL1     |
| MON1B    | CALU     | AAMP     |
| METTL25  | SMO      | PNKD     |
| EMC6     | IRF5     | TNFRSF19 |
| TUBA4A   | LRRC17   | PHTF2    |
| VIL1     | OPN1SW   | HSPB1    |
| AAMP     | SIRT2    | GNG11    |
| PNKD     | HOXD3    | SEM1     |
| TNFRSF19 | MTX2     | GNGT1    |
| PHTF2    | HOXD9    | PTPN12   |
| HSPB1    | HOXD10   | FGL2     |
| GNG11    | HOXD11   | STYXL1   |
| SEM1     | ARHGAP22 | PEX1     |
| GNGT1    | PIAS1    | LRFN1    |
| PTPN12   | SNAP23   | SPINK2   |
| FGL2     | TMOD2    | RASL11B  |
| STYXL1   | DLL4     | DGCR6L   |
| PEX1     | ALDH1A2  | NCF4     |
| LRFN1    | KNSTRN   | CYTH4    |
| SPINK2   | SERF2    | GCAT     |
| RASL11B  | CLN6     | SGSM3    |
| DGCR6L   | ARPP19   | SEZ6L    |
| NCF4     | VPS13C   | VPREB3   |

|          |            |          |
|----------|------------|----------|
| CYTH4    | ISLR       | SDF2L1   |
| GCAT     | THAP10     | YWHAH    |
| SGSM3    | AMOTL2     | RFPL2    |
| SEZ6L    | ACKR4      | A4GALT   |
| VPREB3   | MBD4       | RFPL3    |
| SDF2L1   | COPB1      | CDC42EP1 |
| YWHAH    | MYOD1      | MCHR1    |
| RFPL2    | TPH1       | TST      |
| A4GALT   | E2F8       | APOL5    |
| RFPL3    | SOX15      | IGLL1    |
| CDC42EP1 | PIMREG     | CCDC117  |
| MCHR1    | USP6       | APOL2    |
| TST      | ZNF232     | RAC2     |
| APOL5    | AIPL1      | LIF      |
| IGLL1    | CD68       | C22orf23 |
| CCDC117  | TXNDC17    | APOBEC3A |
| APOL2    | ATP1B2     | EMC4     |
| RAC2     | FXR2       | PMPCB    |
| LIF      | MPDU1      | TAS2R16  |
| C22orf23 | LRRC6      | ATP6V1F  |
| APOBEC3A | QTRT1      | LSM8     |
| EMC4     | ILF3       | VGf      |
| PMPCB    | AP1M2      | STRIP2   |
| DNAJC2   | ERI1       | DNAJB9   |
| TAS2R16  | CLEC11A    | LRRC4    |
| ATP6V1F  | SIGLEC9    | CALU     |
| LSM8     | AC011473.4 | SMO      |
| VGf      | NFATC4     | IRF5     |
| STRIP2   | PRORP      | LRRC17   |
| DNAJB9   | CMA1       | SIRT2    |
| LRRC4    | GEMIN2     | HOXD3    |
| CALU     | DHRS2      | MTX2     |
| SMO      | BCL2L2     | HOXD9    |
| IRF5     | PARP2      | HOXD10   |
| LRRC17   | FOXA1      | HOXD11   |
| OPN1SW   | EAPP       | ARHGAP22 |
| SIRT2    | EGLN3      | PIAS1    |
| HOXD3    | PIP4P1     | SNAP23   |
| MTX2     | NEDD8      | TMOD2    |
| HOXD9    | DAD1       | DLL4     |
| HOXD10   | CDO1       | ALDH1A2  |
| HOXD11   | RAP1B      | KNSTRN   |
| ARHGAP22 | ADGRE1     | SERF2    |
| PIAS1    | AANAT      | CLN6     |

|            |          |            |
|------------|----------|------------|
| SNAP23     | ARHGEF6  | ARPP19     |
| TMOD2      | ART1     | VPS13C     |
| DLL4       | CHRNA10  | ISLR       |
| ALDH1A2    | RPS4Y1   | THAP10     |
| KNSTRN     | VCY1B    | AMOTL2     |
| SERF2      | VCY      | ACKR4      |
| CLN6       | RBMY1J   | MBD4       |
| ARPP19     | DAZL     | COPB1      |
| VPS13C     | MAPK8IP3 | MYOD1      |
| ISLR       | MKNK2    | TPH1       |
| THAP10     | KLF16    | E2F8       |
| AMOTL2     | PGAP6    | SOX15      |
| ACKR4      | INS      | PIMREG     |
| MBD4       | ABHD17A  | USP6       |
| COPB1      | SALL1    | ZNF232     |
| MYOD1      | ZC3H14   | AIPL1      |
| TPH1       | MYO16    | CD68       |
| E2F8       | LMAN1    | TXNDC17    |
| SOX15      | NUP37    | ATP1B2     |
| PIMREG     | DMXL2    | FXR2       |
| USP6       | DSC2     | MPDU1      |
| ZNF232     | ANGEL1   | LRRC6      |
| AIPL1      | SAMD4A   | QTRT1      |
| CD68       | CNGB1    | ILF3       |
| TXNDC17    | CDADC1   | AP1M2      |
| ATP1B2     | NALCN    | ERI1       |
| FXR2       | VPS35L   | CLEC11A    |
| MPDU1      | DOCK7    | SIGLEC9    |
| LRRC6      | CORO7    | AC011473.4 |
| QTRT1      | SEC14L5  | NFATC4     |
| ILF3       | CLSPN    | PRORP      |
| AP1M2      | PBX4     | CMA1       |
| ERI1       | DHX40    | GEMIN2     |
| CLEC11A    | DTWD1    | DHRS2      |
| SIGLEC9    | MEGF8    | BCL2L2     |
| AC011473.4 | ZNF221   | PARP2      |
| NFATC4     | HCN2     | FOXA1      |
| PRORP      | WDR18    | EAPP       |
| CMA1       | IGSF21   | EGLN3      |
| GEMIN2     | SLX1A    | PIP4P1     |
| DHRS2      | INTS2    | NEDD8      |
| BCL2L2     | KHNYN    | DAD1       |
| PARP2      | CERS4    | CDO1       |
| FOXA1      | LILRA1   | RAP1B      |

|          |          |          |
|----------|----------|----------|
| EAPP     | LILRA2   | ADGRE1   |
| EGLN3    | TUBG2    | AANAT    |
| PIP4P1   | TUBG1    | ARHGEF6  |
| NEDD8    | CFHR4    | ART1     |
| DAD1     | RPS16    | CHRNA10  |
| CDO1     | MAST1    | RPS4Y1   |
| RAP1B    | PLPPR2   | VCY1B    |
| ADGRE1   | SULT1C2  | VCY      |
| AANAT    | NCAPG    | RBMY1J   |
| ARHGEF6  | RABGAP1L | DAZL     |
| ART1     | ESYT2    | MAPK8IP3 |
| CHRNA10  | ALOX12   | MKNK2    |
| RPS4Y1   | FBXO44   | KLF16    |
| VCY1B    | UGT2A3   | PGAP6    |
| VCY      | ADAMTS2  | INS      |
| RBMY1J   | CIAO3    | ABHD17A  |
| DAZL     | HBA2     | SALL1    |
| MAPK8IP3 | TRNT1    | ZC3H14   |
| MKNK2    | PDGFRL   | MYO16    |
| KLF16    | DHX29    | LMAN1    |
| PGAP6    | DHX58    | NUP37    |
| INS      | KRT12    | DMXL2    |
| ABHD17A  | KRT31    | DSC2     |
| SALL1    | KRT33B   | ANGEL1   |
| ZC3H14   | PCCB     | SAMD4A   |
| MYO16    | ARFGEF3  | CNGB1    |
| LMAN1    | USP40    | CDADC1   |
| NUP37    | SNX4     | NALCN    |
| DMXL2    | ROPN1B   | VPS35L   |
| DSC2     | SPAG1    | DOCK7    |
| ANGEL1   | RRM2B    | CORO7    |
| SAMD4A   | RHOBTB2  | SEC14L5  |
| CNGB1    | RAF1     | CLSPN    |
| CDADC1   | TDRD1    | PBX4     |
| NALCN    | MED17    | DHX40    |
| VPS35L   | RIC1     | DTWD1    |
| DOCK7    | SCML2    | MEGF8    |
| CORO7    | NXPE1    | ZNF221   |
| SEC14L5  | ALG13    | HCN2     |
| CLSPN    | TSG101   | WDR18    |
| PBX4     | CARD10   | IGSF21   |
| DHX40    | KIAA0930 | SLX1A    |
| DTWD1    | DHX35    | INTS2    |
| MEGF8    | TRPC4AP  | KHNYN    |

|          |           |          |
|----------|-----------|----------|
| ZNF221   | C20orf194 | CERS4    |
| HCN2     | ELN       | LILRA1   |
| WDR18    | FKBP6     | LILRA2   |
| IGSF21   | CUL9      | TUBG2    |
| SLX1A    | ACTR3C    | TUBG1    |
| INTS2    | PCDHGA12  | CFHR4    |
| KHNYN    | PCDHGC5   | RPS16    |
| CERS4    | TMCO6     | MAST1    |
| LILRA1   | NDUFA2    | PLPPR2   |
| LILRA2   | UBE4A     | SULT1C2  |
| TUBG2    | POLDIP3   | NCAPG    |
| TUBG1    | TRMT2A    | RABGAP1L |
| CFHR4    | ESS2      | ESYT2    |
| RPS16    | MYH13     | ALOX12   |
| MAST1    | ZSCAN9    | FBXO44   |
| PLPPR2   | ZKSCAN3   | UGT2A3   |
| SULT1C2  | MICB      | ADAMTS2  |
| NCAPG    | KRT5      | CIAO3    |
| RABGAP1L | KRT1      | HBA2     |
| ESYT2    | KRT75     | TRNT1    |
| ALOX12   | KRT6C     | PDGFRL   |
| FBXO44   | KRT6B     | DHX29    |
| UGT2A3   | DPF2      | DHX58    |
| ADAMTS2  | GAMT      | KRT12    |
| CIAO3    | KCNA5     | KRT31    |
| HBA2     | CRACR2A   | KRT33B   |
| TRNT1    | PSMG3     | PCCB     |
| PDGFRL   | STARD8    | ARFGEF3  |
| DHX29    | FAM155B   | USP40    |
| DHX58    | ECSIT     | VPS50    |
| KRT12    | LDLR      | SNX4     |
| KRT31    | ELOF1     | ROPN1B   |
| KRT33B   | ANGPTL8   | SPAG1    |
| PCCB     | CNN1      | RRM2B    |
| ARFGEF3  | CDC16     | RHOBTB2  |
| USP40    | ZSCAN10   | RAF1     |
| VPS50    | NECTIN2   | TDRD1    |
| SNX4     | TOMM40    | MED17    |
| ROPN1B   | APOC2     | RIC1     |
| SPAG1    | ALLC      | SCML2    |
| RRM2B    | GADD45G   | NXPE1    |
| RHOBTB2  | XPO7      | ALG13    |
| RAF1     | ACE2      | TSG101   |
| TDRD1    | INF2      | CARD10   |

|           |          |           |
|-----------|----------|-----------|
| MED17     | FAM98C   | KIAA0930  |
| RIC1      | SAFB2    | DHX35     |
| SCML2     | NCAN     | TRPC4AP   |
| NXPE1     | PLVAP    | C20orf194 |
| ALG13     | BST2     | ELN       |
| TSG101    | NSUN5    | FKBP6     |
| CARD10    | SLC27A1  | CUL9      |
| KIAA0930  | USHBP1   | ACTR3C    |
| DHX35     | COLGALT1 | PCDHGA12  |
| TRPC4AP   | MRPL34   | PCDHGC5   |
| C20orf194 | PGLS     | TMCO6     |
| ELN       | RSPH3    | NDUFA2    |
| FKBP6     | MAS1     | UBE4A     |
| CUL9      | MLLT1    | POLDIP3   |
| ACTR3C    | FUT5     | TRMT2A    |
| PCDHGA12  | ACTN4    | ESS2      |
| PCDHGC5   | NDUFA10  | MYH13     |
| TMCO6     | ZNF655   | ZSCAN9    |
| NDUFA2    | EPO      | ZKSCAN3   |
| UBE4A     | CACNG6   | MICB      |
| POLDIP3   | ZSWIM6   | KRT5      |
| TRMT2A    | FCHO1    | KRT1      |
| ESS2      | ZNF764   | KRT75     |
| MYH13     | ZNF747   | KRT6C     |
| ZSCAN9    | PXDN     | KRT6B     |
| ZKSCAN3   | GDF15    | DPF2      |
| MICB      | PGPEP1   | GAMT      |
| KRT5      | LSM4     | GALNT8    |
| KRT1      | JUND     | KCNA5     |
| KRT75     | HRC      | CRACR2A   |
| KRT6C     | TRPM4    | PSMG3     |
| KRT6B     | ZNF557   | STARD8    |
| DPF2      | OLFM1    | FAM155B   |
| GAMT      | NUMBL    | ECSIT     |
| GALNT8    | TNNI2    | LDLR      |
| KCNA5     | ATXN10   | ELOF1     |
| CRACR2A   | TUBGCP2  | ANGPTL8   |
| PSMG3     | CALY     | CNN1      |
| STARD8    | CYP2E1   | CDC16     |
| FAM155B   | HBZ      | ZSCAN10   |
| ECSIT     | MNX1     | NECTIN2   |
| LDLR      | ZNF337   | APOE      |
| ELOF1     | ALKBH6   | TOMM40    |
| ANGPTL8   | CEP85    | APOC2     |

|          |          |          |
|----------|----------|----------|
| CNN1     | TAF4     | ALLC     |
| CDC16    | GATA5    | GADD45G  |
| ZSCAN10  | RBBP8NL  | XPO7     |
| NECTIN2  | LAMA5    | ACE2     |
| APOE     | ADRM1    | INF2     |
| TOMM40   | PRDM12   | FAM98C   |
| APOC2    | UBE2M    | SAFB2    |
| ALLC     | TRIM28   | NCAN     |
| GADD45G  | YIPF2    | PLVAP    |
| XPO7     | EIF2S3   | BST2     |
| ACE2     | TMEM160  | NSUN5    |
| INF2     | ZC3H4    | SLC27A1  |
| FAM98C   | MAP3K10  | USHBP1   |
| SAFB2    | SESN2    | COLGALT1 |
| NCAN     | CCDC62   | MRPL34   |
| PLVAP    | HIP1R    | PGLS     |
| BST2     | MRPL4    | LSM7     |
| NSUN5    | PPAN     | RSPH3    |
| SLC27A1  | ANGPTL6  | MAS1     |
| USHBP1   | SHFL     | MLLT1    |
| COLGALT1 | ZNF426   | FUT5     |
| MRPL34   | SLC6A8   | BMP15    |
| PGLS     | ZNF331   | ACTN4    |
| LSM7     | ZNF236   | NDUFA10  |
| RSPH3    | SLC7A10  | ZNF655   |
| MAS1     | LRP3     | EPO      |
| MLLT1    | C12orf65 | CACNG6   |
| FUT5     | GRWD1    | ZSWIM6   |
| BMP15    | NOL11    | FCHO1    |
| ACTN4    | UBE4B    | ZNF764   |
| NDUFA10  | PKDREJ   | ZNF747   |
| ZNF655   | NUTM2F   | PXDN     |
| EPO      | SLC35D2  | GDF15    |
| CACNG6   | PPIL4    | PGPEP1   |
| ZSWIM6   | AKAP12   | LSM4     |
| FCHO1    | LATS1    | JUND     |
| ZNF764   | BPIFB1   | HRC      |
| ZNF747   | BPIFA2   | TRPM4    |
| PXDN     | RBM39    | ZNF557   |
| GDF15    | DEFB118  | OLFM1    |
| PGPEP1   | ACSS2    | NUMBL    |
| LSM4     | ARHGEF9  | TNNI2    |
| JUND     | C1QL1    | ATXN10   |
| HRC      | GFAP     | TUBGCP2  |



|          |          |          |
|----------|----------|----------|
| TRPM4    | HIGD1B   | CALY     |
| ZNF557   | ATP6V1E1 | CYP2E1   |
| OLFM1    | CCL25    | HBZ      |
| NUMBL    | COX4I1   | MNX1     |
| TNNI2    | EMC8     | ZNF337   |
| ATXN10   | GSE1     | ALKBH6   |
| TUBGCP2  | C16orf95 | CEP85    |
| CALY     | GINS2    | TAF4     |
| CYP2E1   | FAM153B  | GATA5    |
| HBZ      | F12      | RBBP8NL  |
| MNX1     | NFATC1   | LAMA5    |
| ZNF337   | IDO1     | ADRM1    |
| ALKBH6   | ABCB7    | PRDM12   |
| CEP85    | HAUS8    | UBE2M    |
| TAF4     | ADGRE3   | TRIM28   |
| GATA5    | MRPS25   | YIPF2    |
| RBBP8NL  | TBC1D5   | EIF2S3   |
| LAMA5    | CAPN7    | TMEM160  |
| ADRM1    | C3orf20  | ZC3H4    |
| PRDM12   | RBSN     | GMFG     |
| UBE2M    | NAPSA    | MAP3K10  |
| TRIM28   | NR1H2    | SESN2    |
| YIPF2    | PDLIM4   | CCDC62   |
| EIF2S3   | GFPT2    | HIP1R    |
| TMEM160  | PSMC3IP  | MRPL4    |
| ZC3H4    | VPS25    | PPAN     |
| GMFG     | RAMP2    | EIF3G    |
| MAP3K10  | AOC2     | ANGPTL6  |
| SESN2    | G6PC     | SHFL     |
| CCDC62   | PCDHAC1  | ZNF426   |
| HIP1R    | DIAPH1   | SLC6A8   |
| MRPL4    | PCDHGA3  | ZNF331   |
| PPAN     | NDFIP1   | ZNF236   |
| EIF3G    | EXOC4    | SLC7A10  |
| ANGPTL6  | PPFIA1   | LRP3     |
| SHFL     | FLYWCH1  | C12orf65 |
| ZNF426   | TMEM204  | GRWD1    |
| SLC6A8   | THOC6    | NOL11    |
| ZNF331   | BARX1    | UBE4B    |
| ZNF236   | WDR44    | PKDREJ   |
| SLC7A10  | CKMT2    | NUTM2F   |
| LRP3     | ZCCHC9   | SLC35D2  |
| C12orf65 | KRT15    | PPIL4    |
| GRWD1    | TNS4     | AKAP12   |

|          |          |          |
|----------|----------|----------|
| NOL11    | RARA     | LATS1    |
| UBE4B    | KRTAP9-8 | BPIFB1   |
| PKDREJ   | PPP1R1B  | BPIFA2   |
| NUTM2F   | FMO5     | RBM39    |
| SLC35D2  | PRKAB2   | DEFB118  |
| PPIL4    | FUS      | ACSS2    |
| AKAP12   | FSHB     | ARHGEF9  |
| LATS1    | ZNF132   | C1QL1    |
| BPIFB1   | USP29    | GFAP     |
| BPIFA2   | CHSY1    | ATP6V1E1 |
| RBM39    | SNRPA1   | CCL25    |
| DEFB118  | NR0B2    | COX4I1   |
| ACSS2    | LIN28A   | EMC8     |
| ARHGEF9  | ADCY7    | GSE1     |
| C1QL1    | THAP1    | C16orf95 |
| GFAP     | RHPN2    | GIN2     |
| HIGD1B   | FAAP24   | FAM153B  |
| ATP6V1E1 | LRRC9    | F12      |
| CCL25    | ACTR10   | NFATC1   |
| COX4I1   | LGALS3   | IDO1     |
| EMC8     | PODNL1   | ABCB7    |
| GSE1     | ZNF700   | HAUS8    |
| C16orf95 | DNAJB1   | ADGRE3   |
| GIN2     | ZSWIM4   | MRPS25   |
| FAM153B  | RFX1     | TBC1D5   |
| F12      | DCAF15   | CAPN7    |
| NFATC1   | SDC1     | C3orf20  |
| IDO1     | TRIM21   | RBSN     |
| ABCB7    | WDR7     | NAPSA    |
| HAUS8    | SMARCC1  | NR1H2    |
| ADGRE3   | SLC6A11  | PDLIM4   |
| MRPS25   | NUP210   | GFPT2    |
| TBC1D5   | EMILIN2  | PSMC3IP  |
| CAPN7    | ARFIP2   | VPS25    |
| C3orf20  | RRP8     | RAMP2    |
| RBSN     | TIMM10B  | AOC2     |
| NAPSA    | EFR3A    | G6PC     |
| NR1H2    | OC90     | PCDHAC1  |
| PDLIM4   | PTCD3    | DIAPH1   |
| GFPT2    | IMMT     | PCDHGA3  |
| PSMC3IP  | MRPL35   | NDFIP1   |
| VPS25    | IQCA1    | EXOC4    |
| RAMP2    | ILKAP    | PPFIA1   |
| AOC2     | PER2     | FLYWCH1  |

|          |          |          |
|----------|----------|----------|
| G6PC     | RAMP1    | TMEM204  |
| PCDHAC1  | SCLY     | THOC6    |
| DIAPH1   | PTPRE    | BARX1    |
| PCDHGA3  | CARD6    | WDR44    |
| NDFIP1   | RAP1GAP2 | CKMT2    |
| EXOC4    | MYBBP1A  | ZCCHC9   |
| PPFIA1   | RPA1     | KRT15    |
| FLYWCH1  | SERPINF1 | TNS4     |
| TMEM204  | EEFSEC   | RARA     |
| THOC6    | TMEM128  | KRTAP9-8 |
| BARX1    | COQ3     | PPP1R1B  |
| WDR44    | POPDC3   | FMO5     |
| CKMT2    | LANCL2   | PRKAB2   |
| ZCCHC9   | GRSF1    | FUS      |
| KRT15    | JCHAIN   | FSHB     |
| TNS4     | UTP3     | ZNF132   |
| RARA     | WBP2     | USP29    |
| KRTAP9-8 | H3-3B    | CHSY1    |
| PPP1R1B  | TRIM47   | SNRPA1   |
| FMO5     | ZRANB2   | NR0B2    |
| PRKAB2   | KDM6B    | LIN28A   |
| FUS      | ASGR2    | ADCY7    |
| FSHB     | SLC52A1  | THAP1    |
| ZNF132   | GUCY2D   | RHPN2    |
| USP29    | CLEC10A  | FAAP24   |
| CHSY1    | RIDA     | LRRC9    |
| SNRPA1   | MATN2    | ACTR10   |
| NR0B2    | REEP2    | LGALS3   |
| LIN28A   | PCBD2    | PODNL1   |
| ADCY7    | ERAL1    | ZNF700   |
| THAP1    | NIP7     | DNAJB1   |
| RHPN2    | TERF2    | ZSWIM4   |
| FAAP24   | VPS4A    | RFX1     |
| LRRC9    | JAG1     | DCAF15   |
| ACTR10   | HSPA12B  | SDC1     |
| LGALS3   | SNAP25   | TRIM21   |
| PODNL1   | BTBD3    | WDR7     |
| ZNF700   | NXT1     | SMARCC1  |
| DNAJB1   | RIN2     | SLC6A11  |
| ZSWIM4   | SSTR4    | NUP210   |
| RFX1     | CRP      | HSD17B7  |
| DCAF15   | HAPLN2   | EMILIN2  |
| SDC1     | APCS     | ARFIP2   |
| TRIM21   | IGHMBP2  | RRP8     |

|          |          |          |
|----------|----------|----------|
| WDR7     | ACY3     | TIMM10B  |
| SMARCC1  | TESMIN   | EFR3A    |
| SLC6A11  | DPH2     | OC90     |
| NUP210   | ZSWIM3   | PTCD3    |
| HSD17B7  | OSER1    | IMMT     |
| EMILIN2  | SERINC3  | MRPL35   |
| ARFIP2   | DMGDH    | IQCA1    |
| RRP8     | BHMT2    | ILKAP    |
| TIMM10B  | AP3B1    | PER2     |
| EFR3A    | ZBED3    | RAMP1    |
| OC90     | SYT4     | SCLY     |
| PTCD3    | SLC14A2  | PTPRE    |
| IMMT     | NMUR2    | CARD6    |
| MRPL35   | PDE6A    | RAP1GAP2 |
| IQCA1    | ATP8A2   | MYBBP1A  |
| ILKAP    | USPL1    | RPA1     |
| PER2     | XPO4     | SERPINF1 |
| RAMP1    | TPTE2    | EEFSEC   |
| SCLY     | RNF17    | TMEM128  |
| PTPRE    | CHRM3    | COQ3     |
| CARD6    | MYH4     | POPDC3   |
| RAP1GAP2 | SCO1     | LANCL2   |
| MYBBP1A  | CHI3L1   | GRSF1    |
| RPA1     | MYBPH    | JCHAIN   |
| SERPINF1 | CHIT1    | UTP3     |
| EEFSEC   | LGR6     | WBP2     |
| TMEM128  | DCLK1    | H3-3B    |
| COQ3     | CCNA1    | TRIM47   |
| POPDC3   | RFXAP    | ZRANB2   |
| LANCL2   | STARD13  | KDM6B    |
| GRSF1    | MORC4    | ASGR2    |
| JCHAIN   | RNF128   | SLC52A1  |
| UTP3     | PCDH19   | GUCY2D   |
| WBP2     | C17orf80 | CLEC10A  |
| H3-3B    | SLC39A11 | RIDA     |
| TRIM47   | BTBD2    | MATN2    |
| ZRANB2   | KMT5C    | REEP2    |
| KDM6B    | ZNF414   | PCBD2    |
| ASGR2    | PDE6B    | ERAL1    |
| SLC52A1  | HSPBP1   | NIP7     |
| GUCY2D   | CSNK1G2  | TERF2    |
| CLEC10A  | RTTN     | VPS4A    |
| RIDA     | MACROD1  | JAG1     |
| MATN2    | LGALS12  | HSPA12B  |

|         |          |         |
|---------|----------|---------|
| REEP2   | PLAAT4   | SNAP25  |
| PCBD2   | PLAAT2   | BTBD3   |
| ERAL1   | CEP20    | NXT1    |
| NIP7    | MED10    | RIN2    |
| TERF2   | CCDC134  | SSTR4   |
| VPS4A   | SLC2A11  | CRP     |
| JAG1    | SEC14L4  | HAPLN2  |
| HSPA12B | PI4KA    | APCS    |
| SNAP25  | GIMAP4   | IGHMBP2 |
| BTBD3   | MKRN1    | ACY3    |
| NXT1    | ACTR3B   | TESMIN  |
| RIN2    | NTS      | DPH2    |
| SSTR4   | BTG1     | ZSWIM3  |
| CRP     | DYDC2    | OSER1   |
| HAPLN2  | TMTC1    | SERINC3 |
| APCS    | KRAS     | DMGDH   |
| IGHMBP2 | IPO8     | BHMT2   |
| ACY3    | SPINK5   | AP3B1   |
| TESMIN  | PMP2     | ZBED3   |
| DPH2    | FABP4    | SYT4    |
| ZSWIM3  | IMPA1    | SLC14A2 |
| OSER1   | E2F5     | NMUR2   |
| SERINC3 | CCDC59   | PDE6A   |
| DMGDH   | LYVE1    | ATP8A2  |
| BHMT2   | MICAL2   | USPL1   |
| AP3B1   | SBF2     | XPO4    |
| ZBED3   | RRAS2    | TPTE2   |
| SYT4    | TEX15    | RNF17   |
| SLC14A2 | SARAF    | CHRM3   |
| NMUR2   | RNF122   | MYH4    |
| PDE6A   | DUSP26   | PEMT    |
| ATP8A2  | ERG28    | SCO1    |
| USPL1   | DGLUCY   | CHI3L1  |
| XPO4    | UNC79    | MYBPH   |
| TPTE2   | CATSPERB | CHIT1   |
| RNF17   | VRTN     | LGR6    |
| CHRM3   | SYNJ2BP  | DCLK1   |
| MYH4    | TTC9     | CCNA1   |
| PEMT    | MED6     | RFXAP   |
| SCO1    | EIF2S1   | STARD13 |
| CHI3L1  | ADAM20   | MORC4   |
| MYBPH   | ELP3     | RNF128  |
| CHIT1   | ADAMDEC1 | PCDH19  |

---
